# Supplementary material for: Analysis of Liver Tumor-Prone Mouse Models of the Hippo Kinase Scaffold Proteins RASSF1A and SAV1
Source: Oxford University Press journal article supplement (doi:10.1158/0008-5472.can-15-3010), 2016-03-16
Supplement: 00085472can153010-sup-157627_1_supp_3311425_p0yp1m.xlsx [file 00085472can153010-sup-157627_1_supp_3311425_p0yp1m.xlsx]

## Sheet: up.RAvsWT
Table S2: Lists of genes differentially expressed between wildtype (WT), Rassf1a-/- Sav1+/+ (RA), Rassf1a+/+ Sav1+/- (SA) and Rassf1a-/- Sav1+/- (RA_SA) mouse livers
ID	RA.vs.WT.FC	RA.vs.WT.p	Gene.Symbol	mRNA.Accession	mRNA..Source	mRna...Description	mRNA...xhyb	GO.Biological.Process.ID	GO.Biological.Process.Term	GO.Cellular.Component.ID	GO.Cellular.Component.Term	GO.Molecular.Function.ID	GO.Molecular.Function.Term	Pathway.Source	Pathway.Name
10338246	1.25547	0.00248772	---	---	---	---	---	---	---	---	---	---	---	---	---
10338406	2.55695	0.00189598	---	---	---	---	---	---	---	---	---	---	---	---	---
10338473	3.18741	0.00104168	---	---	---	---	---	---	---	---	---	---	---	---	---
10338902	2.2405	0.00273149	---	---	---	---	---	---	---	---	---	---	---	---	---
10339499	1.84849	0.00149687	---	---	---	---	---	---	---	---	---	---	---	---	---
10341783	0.779189	0.00456289	---	---	---	---	---	---	---	---	---	---	---	---	---
10342026	1.27947	0.00389487	---	---	---	---	---	---	---	---	---	---	---	---	---
10342181	0.801535	0.000618386	---	---	---	---	---	---	---	---	---	---	---	---	---
10342507	1.07817	0.0015575	---	---	---	---	---	---	---	---	---	---	---	---	---
10342589	2.02075	0.000721471	---	---	---	---	---	---	---	---	---	---	---	---	---
10342772	0.720007	0.00333527	---	---	---	---	---	---	---	---	---	---	---	---	---
10344060	1.43165	0.0015056	---	---	---	---	---	---	---	---	---	---	---	---	---
10344063	1.87651	0.00482195	---	---	---	---	---	---	---	---	---	---	---	---	---
10345675	4.98786	4.19515e-11	Npas2	NM_008719	RefSeq	Mus musculus neuronal PAS domain protein 2 (Npas2), mRNA.	FALSE	GO:0006351 // GO:0006355 // GO:0007165 // GO:0042745 // GO:0045475 // GO:0045944 // GO:0048511	transcription, DNA-dependent // regulation of transcription, DNA-dependent // signal transduction // circadian sleep/wake cycle // locomotor rhythm // positive regulation of transcription from RNA polymerase II promoter // rhythmic process	GO:0005634 // GO:0005667 // GO:0005737	nucleus // transcription factor complex // cytoplasm	GO:0003677 // GO:0003700 // GO:0004871 // GO:0051879	DNA binding // sequence-specific DNA binding transcription factor activity // signal transducer activity // Hsp90 protein binding	---	---
10347310	0.925181	0.000326748	Pnkd	ENSMUST00000027370	ENSEMBL	cdna:known chromosome:NCBIM37:1:74331619:74400258:1 gene:ENSMUSG00000026179 gene_biotype:protein_coding transcript_biotype:protein_coding	FALSE	GO:0008150	biological_process	GO:0005634 // GO:0005737 // GO:0005739 // GO:0005739 // GO:0016020	nucleus // cytoplasm // mitochondrion // mitochondrion // membrane	GO:0003674 // GO:0004416 // GO:0008270 // GO:0016787 // GO:0046872	molecular_function // hydroxyacylglutathione hydrolase activity // zinc ion binding // hydrolase activity // metal ion binding	---	---
10352548	1.28285	2.51633e-05	Slc30a10	NM_001033286	RefSeq	Mus musculus solute carrier family 30, member 10 (Slc30a10), mRNA.	FALSE	GO:0006810 // GO:0006811 // GO:0006812 // GO:0006829 // GO:0008150 // GO:0055085	transport // ion transport // cation transport // zinc ion transport // biological_process // transmembrane transport	GO:0005575 // GO:0005886 // GO:0016020 // GO:0016021	cellular_component // plasma membrane // membrane // integral to membrane	GO:0003674 // GO:0008324	molecular_function // cation transmembrane transporter activity	---	---
10352815	0.883586	6.52531e-05	Irf6	NM_016851	RefSeq	Mus musculus interferon regulatory factor 6 (Irf6), mRNA.	FALSE	GO:0006351 // GO:0006355 // GO:0007050 // GO:0008285 // GO:0008285 // GO:0030154 // GO:0030216 // GO:0043588 // GO:0043588 // GO:0043616 // GO:0043616 // GO:0045893 // GO:0048468	transcription, DNA-dependent // regulation of transcription, DNA-dependent // cell cycle arrest // negative regulation of cell proliferation // negative regulation of cell proliferation // cell differentiation // keratinocyte differentiation // skin development // skin development // keratinocyte proliferation // keratinocyte proliferation // positive regulation of transcription, DNA-dependent //…	GO:0005634 // GO:0005737	nucleus // cytoplasm	GO:0000975 // GO:0003677 // GO:0003700	regulatory region DNA binding // DNA binding // sequence-specific DNA binding transcription factor activity	GenMAPP	Apoptosis
10354792	0.745205	0.00440333	1110034B05Rik	NR_004860	RefSeq	Mus musculus RIKEN cDNA 1110034B05 gene (1110034B05Rik), transcript variant 3, non-coding RNA.	FALSE	GO:0008033 // GO:0031591 // GO:0055114	tRNA processing // wybutosine biosynthetic process // oxidation-reduction process	GO:0005575	cellular_component	GO:0000049 // GO:0005506 // GO:0016491 // GO:0016702 // GO:0016706 // GO:0042803 // GO:0046872	tRNA binding // iron ion binding // oxidoreductase activity // oxidoreductase activity, acting on single donors with incorporation of molecular oxygen, incorporation of two atoms of oxygen // oxidoreductase activity, acting on paired donors, with incorporation or reduction of molecular oxygen, 2-oxoglutarate as one donor, and incorporation of one atom each of oxygen into both donors // protein ho…	---	---
10355456	0.784618	3.04149e-05	Mreg	NM_001005423	RefSeq	Mus musculus melanoregulin (Mreg), mRNA.	FALSE	GO:0030318 // GO:0042640 // GO:0043473 // GO:0048066	melanocyte differentiation // anagen // pigmentation // developmental pigmentation	GO:0005886 // GO:0016020	plasma membrane // membrane	---	---	---	---
10357280	0.922687	0.00371953	Insig2	NM_133748	RefSeq	Mus musculus insulin induced gene 2 (Insig2), transcript variant 1, mRNA.	FALSE	GO:0006629 // GO:0006641 // GO:0006695 // GO:0006991 // GO:0008202 // GO:0008203 // GO:0010894 // GO:0016126 // GO:0030967 // GO:0042472 // GO:0042474 // GO:0045717 // GO:0060021 // GO:0060363	lipid metabolic process // triglyceride metabolic process // cholesterol biosynthetic process // response to sterol depletion // steroid metabolic process // cholesterol metabolic process // negative regulation of steroid biosynthetic process // sterol biosynthetic process // ER-nuclear sterol response pathway // inner ear morphogenesis // middle ear morphogenesis // negative regulation of fatty …	GO:0005783 // GO:0016020 // GO:0016021 // GO:0032937	endoplasmic reticulum // membrane // integral to membrane // SREBP-SCAP-Insig complex	GO:0005515 // GO:0008134	protein binding // transcription factor binding	---	---
10359754	0.96701	0.00199688	Mpzl1	NM_001083897	RefSeq	Mus musculus myelin protein zero-like 1 (Mpzl1), transcript variant 1, mRNA.	FALSE	---	---	GO:0016020 // GO:0016021	membrane // integral to membrane	---	---	---	---
10360631	0.982228	4.77669e-06	Adck3	NM_023341	RefSeq	Mus musculus aarF domain containing kinase 3 (Adck3), nuclear gene encoding mitochondrial protein, transcript variant 1, mRNA.	FALSE	GO:0006468 // GO:0008150 // GO:0016310	protein phosphorylation // biological_process // phosphorylation	GO:0005739	mitochondrion	GO:0000166 // GO:0003674 // GO:0004674 // GO:0005524 // GO:0016301 // GO:0016740 // GO:0016772	nucleotide binding // molecular_function // protein serine/threonine kinase activity // ATP binding // kinase activity // transferase activity // transferase activity, transferring phosphorus-containing groups	---	---
10360648	0.61899	0.00145131	Psen2	NM_011183	RefSeq	Mus musculus presenilin 2 (Psen2), transcript variant 1, mRNA.	FALSE	GO:0000122 // GO:0001708 // GO:0001756 // GO:0001921 // GO:0001933 // GO:0001942 // GO:0002244 // GO:0002286 // GO:0002573 // GO:0006508 // GO:0006509 // GO:0006816 // GO:0006915 // GO:0006915 // GO:0006916 // GO:0007175 // GO:0007176 // GO:0007219 // GO:0007220 // GO:0007611 // GO:0007613 // GO:0009790 // GO:0015031 // GO:0016485 // GO:0016485 // GO:0021904 // GO:0030326 // GO:0030900 // GO:0032…	negative regulation of transcription from RNA polymerase II promoter // cell fate specification // somitogenesis // positive regulation of receptor recycling // negative regulation of protein phosphorylation // hair follicle development // hemopoietic progenitor cell differentiation // T cell activation involved in immune response // myeloid leukocyte differentiation // proteolysis // membrane pr…	GO:0000776 // GO:0005634 // GO:0005637 // GO:0005743 // GO:0005765 // GO:0005783 // GO:0005783 // GO:0005794 // GO:0005813 // GO:0005829 // GO:0005887 // GO:0005938 // GO:0009986 // GO:0016020 // GO:0016021 // GO:0016324 // GO:0030018 // GO:0030424 // GO:0030426 // GO:0031594 // GO:0035253 // GO:0043025 // GO:0043198 // GO:0043234 // GO:0045121 // GO:0048471	kinetochore // nucleus // nuclear inner membrane // mitochondrial inner membrane // lysosomal membrane // endoplasmic reticulum // endoplasmic reticulum // Golgi apparatus // centrosome // cytosol // integral to plasma membrane // cell cortex // cell surface // membrane // integral to membrane // apical plasma membrane // Z disc // axon // growth cone // neuromuscular junction // ciliary rootlet …	GO:0004175 // GO:0004175 // GO:0004190 // GO:0005515 // GO:0008233 // GO:0016787	endopeptidase activity // endopeptidase activity // aspartic-type endopeptidase activity // protein binding // peptidase activity // hydrolase activity	---	---
10360806	0.700664	0.000725709	Capn2	NM_009794	RefSeq	Mus musculus calpain 2 (Capn2), mRNA.	FALSE	GO:0001824 // GO:0006508 // GO:0007520 // GO:0008152 // GO:0008152 // GO:0016540	blastocyst development // proteolysis // myoblast fusion // metabolic process // metabolic process // protein autoprocessing	GO:0000785 // GO:0005622 // GO:0005625 // GO:0005626 // GO:0005634 // GO:0005737 // GO:0005886 // GO:0016020	chromatin // intracellular // soluble fraction // insoluble fraction // nucleus // cytoplasm // plasma membrane // membrane	GO:0004198 // GO:0004198 // GO:0005509 // GO:0008092 // GO:0008233 // GO:0008234 // GO:0016787 // GO:0046982	calcium-dependent cysteine-type endopeptidase activity // calcium-dependent cysteine-type endopeptidase activity // calcium ion binding // cytoskeletal protein binding // peptidase activity // cysteine-type peptidase activity // hydrolase activity // protein heterodimerization activity	GenMAPP	Integrin-mediated_cell_adhesion_KEGG
10361381	0.779294	0.00236117	Syne1	ENSMUST00000056571	ENSEMBL	cdna:known chromosome:NCBIM37:10:4804527:5326338:1 gene:ENSMUSG00000019769 gene_biotype:protein_coding transcript_biotype:protein_coding	FALSE	GO:0007030 // GO:0040023 // GO:0042692 // GO:0048260 // GO:0048814 // GO:0090286 // GO:0090292	Golgi organization // establishment of nucleus localization // muscle cell differentiation // positive regulation of receptor-mediated endocytosis // regulation of dendrite morphogenesis // cytoskeletal anchoring at nuclear membrane // nuclear matrix anchoring at nuclear membrane	GO:0005634 // GO:0005635 // GO:0005635 // GO:0005737 // GO:0005794 // GO:0005819 // GO:0005856 // GO:0016020 // GO:0016021 // GO:0030017 // GO:0030496 // GO:0031965 // GO:0034993 // GO:0043197 // GO:0045211 // GO:0048471	nucleus // nuclear envelope // nuclear envelope // cytoplasm // Golgi apparatus // spindle // cytoskeleton // membrane // integral to membrane // sarcomere // midbody // nuclear membrane // SUN-KASH complex // dendritic spine // postsynaptic membrane // perinuclear region of cytoplasm	GO:0003779 // GO:0005102 // GO:0005515 // GO:0005521 // GO:0019899	actin binding // receptor binding // protein binding // lamin binding // enzyme binding	---	---
10361509	0.732786	0.00139705	Syne1	ENSMUST00000056571	ENSEMBL	cdna:known chromosome:NCBIM37:10:4804527:5326338:1 gene:ENSMUSG00000019769 gene_biotype:protein_coding transcript_biotype:protein_coding	FALSE	GO:0007030 // GO:0040023 // GO:0042692 // GO:0048260 // GO:0048814 // GO:0090286 // GO:0090292	Golgi organization // establishment of nucleus localization // muscle cell differentiation // positive regulation of receptor-mediated endocytosis // regulation of dendrite morphogenesis // cytoskeletal anchoring at nuclear membrane // nuclear matrix anchoring at nuclear membrane	GO:0005634 // GO:0005635 // GO:0005635 // GO:0005737 // GO:0005794 // GO:0005819 // GO:0005856 // GO:0016020 // GO:0016021 // GO:0030017 // GO:0030496 // GO:0031965 // GO:0034993 // GO:0043197 // GO:0045211 // GO:0048471	nucleus // nuclear envelope // nuclear envelope // cytoplasm // Golgi apparatus // spindle // cytoskeleton // membrane // integral to membrane // sarcomere // midbody // nuclear membrane // SUN-KASH complex // dendritic spine // postsynaptic membrane // perinuclear region of cytoplasm	GO:0003779 // GO:0005102 // GO:0005515 // GO:0005521 // GO:0019899	actin binding // receptor binding // protein binding // lamin binding // enzyme binding	---	---
10362091	1.06212	0.000257448	---	---	---	---	---	---	---	---	---	---	---	---	---
10362440	0.788981	0.00148753	---	---	---	---	---	---	---	---	---	---	---	---	---
10362876	0.610571	0.00256697	Pdss2	NM_027772	RefSeq	Mus musculus prenyl (solanesyl) diphosphate synthase, subunit 2 (Pdss2), transcript variant 1, mRNA.	FALSE	GO:0006744 // GO:0006744 // GO:0008299 // GO:0008299 // GO:0050878 // GO:0051290	ubiquinone biosynthetic process // ubiquinone biosynthetic process // isoprenoid biosynthetic process // isoprenoid biosynthetic process // regulation of body fluid levels // protein heterotetramerization	GO:0005737 // GO:0005739	cytoplasm // mitochondrion	GO:0000010 // GO:0016740 // GO:0046982 // GO:0046982 // GO:0050347	trans-hexaprenyltranstransferase activity // transferase activity // protein heterodimerization activity // protein heterodimerization activity // trans-octaprenyltranstransferase activity	---	---
10363575	0.658932	0.00226763	Dna2	NM_177372	RefSeq	Mus musculus DNA replication helicase 2 homolog (yeast) (Dna2), mRNA.	FALSE	GO:0006260 // GO:0006264 // GO:0006284 // GO:0043137 // GO:0043504 // GO:0045740	DNA replication // mitochondrial DNA replication // base-excision repair // DNA replication, removal of RNA primer // mitochondrial DNA repair // positive regulation of DNA replication	GO:0005634 // GO:0042645	nucleus // mitochondrial nucleoid	GO:0000166 // GO:0003677 // GO:0004003 // GO:0004386 // GO:0005524 // GO:0016787 // GO:0016890 // GO:0017108	nucleotide binding // DNA binding // ATP-dependent DNA helicase activity // helicase activity // ATP binding // hydrolase activity // site-specific endodeoxyribonuclease activity, specific for altered base // 5'-flap endonuclease activity	---	---
10365384	1.1057	0.000190252	Rfx4	NM_001024918	RefSeq	Mus musculus regulatory factor X, 4 (influences HLA class II expression) (Rfx4), transcript variant 1, mRNA.	FALSE	GO:0006351 // GO:0006355 // GO:0006357 // GO:0021516 // GO:0021696 // GO:0030900 // GO:0030901 // GO:0045944	transcription, DNA-dependent // regulation of transcription, DNA-dependent // regulation of transcription from RNA polymerase II promoter // dorsal spinal cord development // cerebellar cortex morphogenesis // forebrain development // midbrain development // positive regulation of transcription from RNA polymerase II promoter	GO:0005634	nucleus	GO:0003677 // GO:0003682 // GO:0005515	DNA binding // chromatin binding // protein binding	---	---
10367066	0.977283	4.91358e-05	Sdr9c7	NM_027301	RefSeq	Mus musculus 4short chain dehydrogenase/reductase family 9C, member 7 (Sdr9c7), mRNA.	FALSE	GO:0008152 // GO:0055114	metabolic process // oxidation-reduction process	GO:0005730 // GO:0005737	nucleolus // cytoplasm	GO:0000166 // GO:0004745 // GO:0016491	nucleotide binding // retinol dehydrogenase activity // oxidoreductase activity	---	---
10367728	0.825446	0.00032738	Tab2	NM_138667	RefSeq	Mus musculus TGF-beta activated kinase 1/MAP3K7 binding protein 2 (Tab2), mRNA.	FALSE	GO:0007507 // GO:0045860	heart development // positive regulation of protein kinase activity	GO:0005622 // GO:0005625 // GO:0005634 // GO:0005737	intracellular // soluble fraction // nucleus // cytoplasm	GO:0005515 // GO:0008270 // GO:0046872 // GO:0070530	protein binding // zinc ion binding // metal ion binding // K63-linked polyubiquitin binding	GenMAPP	Circadian_Exercise
10368817	1.05093	0.00109038	Ccdc162	NM_001177571	RefSeq	Mus musculus coiled-coil domain containing 162 (Ccdc162), mRNA.	FALSE	GO:0008150	biological_process	GO:0005575	cellular_component	GO:0003674	molecular_function	---	---
10369276	0.936081	3.13557e-06	Ccdc109a	NM_001033259	RefSeq	Mus musculus coiled-coil domain containing 109A (Ccdc109a), nuclear gene encoding mitochondrial protein, mRNA.	FALSE	GO:0006810 // GO:0006811 // GO:0006816 // GO:0006851 // GO:0006851 // GO:0019722 // GO:0035786 // GO:0051561 // GO:0051561 // GO:0070588	transport // ion transport // calcium ion transport // mitochondrial calcium ion transport // mitochondrial calcium ion transport // calcium-mediated signaling // protein complex oligomerization // elevation of mitochondrial calcium ion concentration // elevation of mitochondrial calcium ion concentration // calcium ion transmembrane transport	GO:0005739 // GO:0005743 // GO:0016020 // GO:0016021	mitochondrion // mitochondrial inner membrane // membrane // integral to membrane	GO:0005262	calcium channel activity	---	---
10371111	0.991862	0.000370324	Tjp3	NM_013769	RefSeq	Mus musculus tight junction protein 3 (Tjp3), mRNA.	FALSE	GO:0008150	biological_process	GO:0005923 // GO:0009986 // GO:0016324	tight junction // cell surface // apical plasma membrane	GO:0003674	molecular_function	---	---
10375002	0.979611	0.000451623	Cpeb4	NM_026252	RefSeq	Mus musculus cytoplasmic polyadenylation element binding protein 4 (Cpeb4), mRNA.	FALSE	GO:0008150	biological_process	GO:0045202	synapse	GO:0000166 // GO:0003676 // GO:0003723	nucleotide binding // nucleic acid binding // RNA binding	---	---
10375485	0.763056	1.55735e-05	---	ENSMUST00000121448	ENSEMBL	cdna:pseudogene chromosome:NCBIM37:11:48408781:48409311:1 gene:ENSMUSG00000082250 gene_biotype:pseudogene transcript_biotype:transcribed_processed_pseudogene	FALSE	---	---	---	---	---	---	---	---
10375704	1.28854	9.24738e-06	3010026O09Rik	NM_026543	RefSeq	Mus musculus RIKEN cDNA 3010026O09 gene (3010026O09Rik), mRNA.	FALSE	GO:0008150	biological_process	GO:0005575	cellular_component	GO:0003674	molecular_function	---	---
10377215	0.855172	0.00153938	Gas7	NM_008088	RefSeq	Mus musculus growth arrest specific 7 (Gas7), transcript variant 1, mRNA.	FALSE	GO:0008360 // GO:0030041 // GO:0030182 // GO:0048812 // GO:0051017	regulation of cell shape // actin filament polymerization // neuron differentiation // neuron projection morphogenesis // actin filament bundle assembly	GO:0001726 // GO:0005884	ruffle // actin filament	GO:0051015	actin filament binding	---	---
10377987	0.618562	0.00276601	Rabep1	NM_019400	RefSeq	Mus musculus rabaptin, RAB GTPase binding effector protein 1 (Rabep1), mRNA.	FALSE	GO:0006810 // GO:0006897 // GO:0006915 // GO:0015031	transport // endocytosis // apoptotic process // protein transport	GO:0005737 // GO:0005768 // GO:0005768 // GO:0030139 // GO:0031410	cytoplasm // endosome // endosome // endocytic vesicle // cytoplasmic vesicle	GO:0005096 // GO:0005515 // GO:0008083 // GO:0042803	GTPase activator activity // protein binding // growth factor activity // protein homodimerization activity	---	---
10378385	0.84391	0.00165569	Spata22	NM_001045531	RefSeq	Mus musculus spermatogenesis associated 22 (Spata22), mRNA.	FALSE	GO:0008150	biological_process	GO:0005575	cellular_component	GO:0003674	molecular_function	---	---
10379765	0.61449	0.00390943	Hnf1b	NM_009330	RefSeq	Mus musculus HNF1 homeobox B (Hnf1b), mRNA.	FALSE	GO:0000122 // GO:0001706 // GO:0001714 // GO:0001822 // GO:0001822 // GO:0001826 // GO:0001889 // GO:0006351 // GO:0006355 // GO:0007492 // GO:0009749 // GO:0009790 // GO:0009952 // GO:0010628 // GO:0030073 // GO:0030111 // GO:0030902 // GO:0031018 // GO:0032922 // GO:0035565 // GO:0039020 // GO:0042663 // GO:0043066 // GO:0045893 // GO:0045893 // GO:0045944 // GO:0045944 // GO:0048557 // GO:0048…	negative regulation of transcription from RNA polymerase II promoter // endoderm formation // endodermal cell fate specification // kidney development // kidney development // inner cell mass cell differentiation // liver development // transcription, DNA-dependent // regulation of transcription, DNA-dependent // endoderm development // response to glucose stimulus // embryo development // anteri…	GO:0005634 // GO:0005634 // GO:0005667	nucleus // nucleus // transcription factor complex	GO:0001159 // GO:0003677 // GO:0003677 // GO:0003700 // GO:0003700 // GO:0003705 // GO:0003705 // GO:0005515 // GO:0032403 // GO:0042803 // GO:0042803 // GO:0042803 // GO:0043565 // GO:0044212 // GO:0046982 // GO:0046982	core promoter proximal region DNA binding // DNA binding // DNA binding // sequence-specific DNA binding transcription factor activity // sequence-specific DNA binding transcription factor activity // RNA polymerase II distal enhancer sequence-specific DNA binding transcription factor activity // RNA polymerase II distal enhancer sequence-specific DNA binding transcription factor activity // prot…	---	---
10379795	0.644813	0.00471507	Synrg	NM_001115009	RefSeq	Mus musculus synergin, gamma (Synrg), transcript variant 1, mRNA.	FALSE	GO:0006810 // GO:0006897 // GO:0008150 // GO:0015031	transport // endocytosis // biological_process // protein transport	GO:0005737 // GO:0005794 // GO:0016020 // GO:0030130	cytoplasm // Golgi apparatus // membrane // clathrin coat of trans-Golgi network vesicle	GO:0003674 // GO:0005509	molecular_function // calcium ion binding	---	---
10380560	0.612624	0.00281876	Zfp652	NM_201609	RefSeq	Mus musculus zinc finger protein 652 (Zfp652), mRNA.	FALSE	GO:0006351 // GO:0006355 // GO:0008150	transcription, DNA-dependent // regulation of transcription, DNA-dependent // biological_process	GO:0005622 // GO:0005634	intracellular // nucleus	GO:0003676 // GO:0003677 // GO:0008270 // GO:0046872	nucleic acid binding // DNA binding // zinc ion binding // metal ion binding	---	---
10382912	0.898428	5.36267e-06	2016-09-09	NM_001113486	RefSeq	Mus musculus septin 9 (Sept9), transcript variant 1, mRNA.	FALSE	GO:0007049 // GO:0051291 // GO:0051301	cell cycle // protein heterooligomerization // cell division	GO:0001725 // GO:0005737 // GO:0005856 // GO:0005874 // GO:0048471	stress fiber // cytoplasm // cytoskeleton // microtubule // perinuclear region of cytoplasm	GO:0000166 // GO:0005525	nucleotide binding // GTP binding	---	---
10384378	1.25349	4.493e-07	Ddc	NM_001190448	RefSeq	Mus musculus dopa decarboxylase (Ddc), transcript variant 1, mRNA.	FALSE	GO:0006520 // GO:0009636 // GO:0015842 // GO:0019752 // GO:0042416 // GO:0042423 // GO:0042427	cellular amino acid metabolic process // response to toxin // synaptic vesicle amine transport // carboxylic acid metabolic process // dopamine biosynthetic process // catecholamine biosynthetic process // serotonin biosynthetic process	GO:0005625 // GO:0005737 // GO:0008021 // GO:0030424 // GO:0043025	soluble fraction // cytoplasm // synaptic vesicle // axon // neuronal cell body	GO:0003824 // GO:0004058 // GO:0016597 // GO:0016829 // GO:0016831 // GO:0019904 // GO:0030170	catalytic activity // aromatic-L-amino-acid decarboxylase activity // amino acid binding // lyase activity // carboxy-lyase activity // protein domain specific binding // pyridoxal phosphate binding	GenMAPP	Biogenic_Amine_Synthesis
10384572	0.638865	0.00209847	1110067D22Rik	NM_173752	RefSeq	Mus musculus RIKEN cDNA 1110067D22 gene (1110067D22Rik), mRNA.	FALSE	GO:0008150	biological_process	GO:0005622	intracellular	GO:0003674 // GO:0030246	molecular_function // carbohydrate binding	---	---
10386394	0.876501	0.00368516	Zfp867	NM_178417	RefSeq	Mus musculus zinc finger protein 867 (Zfp867), mRNA.	FALSE	GO:0008150	biological_process	GO:0005575	cellular_component	GO:0003674 // GO:0046872	molecular_function // metal ion binding	---	---
10388834	1.4997	0.00382377	Slc13a2	NM_022411	RefSeq	Mus musculus solute carrier family 13 (sodium-dependent dicarboxylate transporter), member 2 (Slc13a2), mRNA.	FALSE	GO:0006810 // GO:0006811 // GO:0006814 // GO:0055085	transport // ion transport // sodium ion transport // transmembrane transport	GO:0016020 // GO:0016021	membrane // integral to membrane	GO:0005215 // GO:0015293	transporter activity // symporter activity	---	---
10389581	1.32502	3.75179e-05	Ypel2	NM_001005341	RefSeq	Mus musculus yippee-like 2 (Drosophila) (Ypel2), mRNA.	FALSE	GO:0008150	biological_process	GO:0005575 // GO:0005634	cellular_component // nucleus	GO:0003674	molecular_function	---	---
10390691	0.664055	0.00474405	Nr1d1	NM_145434	RefSeq	Mus musculus nuclear receptor subfamily 1, group D, member 1 (Nr1d1), mRNA.	FALSE	GO:0000122 // GO:0006351 // GO:0006355 // GO:0007623 // GO:0010871 // GO:0034144 // GO:0043401 // GO:0071222	negative regulation of transcription from RNA polymerase II promoter // transcription, DNA-dependent // regulation of transcription, DNA-dependent // circadian rhythm // negative regulation of receptor biosynthetic process // negative regulation of toll-like receptor 4 signaling pathway // steroid hormone mediated signaling pathway // cellular response to lipopolysaccharide	GO:0000790 // GO:0005634	nuclear chromatin // nucleus	GO:0003677 // GO:0003700 // GO:0003707 // GO:0004872 // GO:0008270 // GO:0043565 // GO:0044212 // GO:0046872	DNA binding // sequence-specific DNA binding transcription factor activity // steroid hormone receptor activity // receptor activity // zinc ion binding // sequence-specific DNA binding // transcription regulatory region DNA binding // metal ion binding	---	---
10392440	0.890492	0.00404622	Slc16a6	NM_001029842	RefSeq	Mus musculus solute carrier family 16 (monocarboxylic acid transporters), member 6 (Slc16a6), transcript variant 1, mRNA.	FALSE	GO:0006810 // GO:0008150 // GO:0055085	transport // biological_process // transmembrane transport	GO:0005575 // GO:0005886 // GO:0016020 // GO:0016021	cellular_component // plasma membrane // membrane // integral to membrane	GO:0003674 // GO:0015293	molecular_function // symporter activity	---	---
10394611	0.895884	0.000479266	Nbas	ENSMUST00000042953	ENSEMBL	cdna:known chromosome:NCBIM37:12:13275933:13590616:1 gene:ENSMUSG00000020576 gene_biotype:protein_coding transcript_biotype:protein_coding	FALSE	GO:0008150	biological_process	GO:0005575	cellular_component	GO:0003674	molecular_function	---	---
10394627	0.706704	0.000209317	Nbas	NM_027706	RefSeq	Mus musculus neuroblastoma amplified sequence (Nbas), mRNA.	FALSE	GO:0008150	biological_process	GO:0005575	cellular_component	GO:0003674	molecular_function	---	---
10394862	1.11547	3.37184e-05	Asap2	NM_001135192	RefSeq	Mus musculus ArfGAP with SH3 domain, ankyrin repeat and PH domain 2 (Asap2), transcript variant 3, mRNA.	FALSE	GO:0008150 // GO:0032312	biological_process // regulation of ARF GTPase activity	GO:0005575 // GO:0005737 // GO:0005794 // GO:0005886 // GO:0016020	cellular_component // cytoplasm // Golgi apparatus // plasma membrane // membrane	GO:0003674 // GO:0005096 // GO:0005543 // GO:0008060 // GO:0008270 // GO:0046872	molecular_function // GTPase activator activity // phospholipid binding // ARF GTPase activator activity // zinc ion binding // metal ion binding	---	---
10395039	0.969422	0.00241842	Cmpk2	NM_020557	RefSeq	Mus musculus cytidine monophosphate (UMP-CMP) kinase 2, mitochondrial (Cmpk2), nuclear gene encoding mitochondrial protein, mRNA.	FALSE	GO:0006221 // GO:0006227 // GO:0006233 // GO:0016310 // GO:0046939 // GO:0071222	pyrimidine nucleotide biosynthetic process // dUDP biosynthetic process // dTDP biosynthetic process // phosphorylation // nucleotide phosphorylation // cellular response to lipopolysaccharide	GO:0005625 // GO:0005634 // GO:0005739	soluble fraction // nucleus // mitochondrion	GO:0000166 // GO:0004127 // GO:0004798 // GO:0005524 // GO:0009041 // GO:0016301 // GO:0016740 // GO:0033862	nucleotide binding // cytidylate kinase activity // thymidylate kinase activity // ATP binding // uridylate kinase activity // kinase activity // transferase activity // UMP kinase activity	---	---
10399419	1.41061	7.15578e-06	Tubb2b	NM_023716	RefSeq	Mus musculus tubulin, beta 2B class IIB (Tubb2b), mRNA.	FALSE	GO:0001764 // GO:0006184 // GO:0007017 // GO:0007018 // GO:0051258	neuron migration // GTP catabolic process // microtubule-based process // microtubule-based movement // protein polymerization	GO:0005737 // GO:0005856 // GO:0005874 // GO:0043234	cytoplasm // cytoskeleton // microtubule // protein complex	GO:0000166 // GO:0003924 // GO:0005198 // GO:0005525	nucleotide binding // GTPase activity // structural molecule activity // GTP binding	---	---
10399696	0.882773	0.000874392	Rnf144a	NM_001081977	RefSeq	Mus musculus ring finger protein 144A (Rnf144a), transcript variant 1, mRNA.	FALSE	GO:0008150	biological_process	GO:0005794 // GO:0016020 // GO:0016021	Golgi apparatus // membrane // integral to membrane	GO:0008270 // GO:0016874 // GO:0046872	zinc ion binding // ligase activity // metal ion binding	---	---
10399801	0.764831	3.28561e-05	Sntg2	NM_172951	RefSeq	Mus musculus syntrophin, gamma 2 (Sntg2), mRNA.	FALSE	---	---	GO:0005737 // GO:0005856 // GO:0005886 // GO:0016020	cytoplasm // cytoskeleton // plasma membrane // membrane	GO:0003779 // GO:0005543 // GO:0030165	actin binding // phospholipid binding // PDZ domain binding	---	---
10405693	0.667437	0.00351166	Dapk1	ENSMUST00000077453	ENSEMBL	cdna:known chromosome:NCBIM37:13:60703308:60864546:1 gene:ENSMUSG00000021559 gene_biotype:protein_coding transcript_biotype:protein_coding	FALSE	GO:0006468 // GO:0006468 // GO:0006468 // GO:0006915 // GO:0006916 // GO:0006917 // GO:0007165 // GO:0007243 // GO:0007243 // GO:0008624 // GO:0016310 // GO:0043065 // GO:2000310	protein phosphorylation // protein phosphorylation // protein phosphorylation // apoptotic process // anti-apoptosis // induction of apoptosis // signal transduction // intracellular protein kinase cascade // intracellular protein kinase cascade // induction of apoptosis by extracellular signals // phosphorylation // positive regulation of apoptotic process // regulation of N-methyl-D-aspartate s…	GO:0005737 // GO:0015629	cytoplasm // actin cytoskeleton	GO:0000166 // GO:0004672 // GO:0004674 // GO:0005515 // GO:0005516 // GO:0005516 // GO:0005524 // GO:0005524 // GO:0016301 // GO:0016740 // GO:0016772	nucleotide binding // protein kinase activity // protein serine/threonine kinase activity // protein binding // calmodulin binding // calmodulin binding // ATP binding // ATP binding // kinase activity // transferase activity // transferase activity, transferring phosphorus-containing groups	---	---
10405820	0.650102	0.000280799	1810034E14Rik	NR_045798	RefSeq	Mus musculus RIKEN cDNA 1810034E14 gene (1810034E14Rik), non-coding RNA.	FALSE	---	---	---	---	---	---	---	---
10407040	0.585431	0.00115399	Esco1	NM_001081222	RefSeq	Mus musculus establishment of cohesion 1 homolog 1 (S. cerevisiae) (Esco1), mRNA.	FALSE	GO:0006275 // GO:0007049 // GO:0008152 // GO:0034421	regulation of DNA replication // cell cycle // metabolic process // post-translational protein acetylation	GO:0000785 // GO:0005634 // GO:0005694	chromatin // nucleus // chromosome	GO:0003674 // GO:0016740 // GO:0016746 // GO:0046872	molecular_function // transferase activity // transferase activity, transferring acyl groups // metal ion binding	---	---
10408610	1.99064	4.04781e-06	Tubb2a	NM_009450	RefSeq	Mus musculus tubulin, beta 2A class IIA (Tubb2a), mRNA.	FALSE	GO:0006184 // GO:0007017 // GO:0007018 // GO:0051258	GTP catabolic process // microtubule-based process // microtubule-based movement // protein polymerization	GO:0005737 // GO:0005856 // GO:0005874 // GO:0043234	cytoplasm // cytoskeleton // microtubule // protein complex	GO:0000166 // GO:0003924 // GO:0005198 // GO:0005525	nucleotide binding // GTPase activity // structural molecule activity // GTP binding	---	---
10408613	1.85092	1.5302e-05	Tubb2b	NM_023716	RefSeq	Mus musculus tubulin, beta 2B class IIB (Tubb2b), mRNA.	FALSE	GO:0001764 // GO:0006184 // GO:0007017 // GO:0007018 // GO:0051258	neuron migration // GTP catabolic process // microtubule-based process // microtubule-based movement // protein polymerization	GO:0005737 // GO:0005856 // GO:0005874 // GO:0043234	cytoplasm // cytoskeleton // microtubule // protein complex	GO:0000166 // GO:0003924 // GO:0005198 // GO:0005525	nucleotide binding // GTPase activity // structural molecule activity // GTP binding	---	---
10408937	0.607596	0.002232	Atxn1	NM_001199305	RefSeq	Mus musculus ataxin 1 (Atxn1), transcript variant 1, mRNA.	FALSE	GO:0006351 // GO:0006355 // GO:0008344 // GO:0008542 // GO:0042326 // GO:0043569 // GO:0045892 // GO:0045944 // GO:0051168 // GO:0060079	transcription, DNA-dependent // regulation of transcription, DNA-dependent // adult locomotory behavior // visual learning // negative regulation of phosphorylation // negative regulation of insulin-like growth factor receptor signaling pathway // negative regulation of transcription, DNA-dependent // positive regulation of transcription from RNA polymerase II promoter // nuclear export // regula…	GO:0005634 // GO:0005654 // GO:0005737 // GO:0016363 // GO:0042405 // GO:0042405 // GO:0043231	nucleus // nucleoplasm // cytoplasm // nuclear matrix // nuclear inclusion body // nuclear inclusion body // intracellular membrane-bounded organelle	GO:0003677 // GO:0003723 // GO:0005515 // GO:0008022 // GO:0008266 // GO:0034046 // GO:0042802 // GO:0043621	DNA binding // RNA binding // protein binding // protein C-terminus binding // poly(U) RNA binding // poly(G) RNA binding // identical protein binding // protein self-association	GenMAPP	mRNA_processing_binding_Reactome
10412701	0.703089	0.00355833	3830406C13Rik	NM_146051	RefSeq	Mus musculus RIKEN cDNA 3830406C13 gene (3830406C13Rik), transcript variant 1, mRNA.	FALSE	GO:0008150	biological_process	GO:0005575	cellular_component	GO:0003674	molecular_function	---	---
10412943	0.587354	0.00152992	Nudt13	NM_026341	RefSeq	Mus musculus nudix (nucleoside diphosphate linked moiety X)-type motif 13 (Nudt13), mRNA.	FALSE	GO:0008150	biological_process	GO:0005739	mitochondrion	GO:0016787 // GO:0046872	hydrolase activity // metal ion binding	---	---
10417183	0.727365	0.00320998	Pcca	NM_144844	RefSeq	Mus musculus propionyl-Coenzyme A carboxylase, alpha polypeptide (Pcca), mRNA.	FALSE	GO:0008152	metabolic process	GO:0005739 // GO:0005739	mitochondrion // mitochondrion	GO:0000166 // GO:0003824 // GO:0004075 // GO:0004658 // GO:0005524 // GO:0016874 // GO:0019899 // GO:0046872	nucleotide binding // catalytic activity // biotin carboxylase activity // propionyl-CoA carboxylase activity // ATP binding // ligase activity // enzyme binding // metal ion binding	---	---
10424404	1.04632	0.00256531	Pvt1	NR_003368	RefSeq	Mus musculus plasmacytoma variant translocation 1 (Pvt1), non-coding RNA.	FALSE	---	---	---	---	---	---	---	---
10427744	0.598198	0.00168898	Rai14	NM_030690	RefSeq	Mus musculus retinoic acid induced 14 (Rai14), transcript variant 1, mRNA.	FALSE	---	---	GO:0005737 // GO:0005739 // GO:0005856	cytoplasm // mitochondrion // cytoskeleton	---	---	---	---
10427772	0.834208	0.000901122	Tars	NM_033074	RefSeq	Mus musculus threonyl-tRNA synthetase (Tars), mRNA.	FALSE	GO:0006412 // GO:0006418 // GO:0006435 // GO:0043039	translation // tRNA aminoacylation for protein translation // threonyl-tRNA aminoacylation // tRNA aminoacylation	GO:0005737 // GO:0015629	cytoplasm // actin cytoskeleton	GO:0000166 // GO:0004812 // GO:0004829 // GO:0005524 // GO:0016874 // GO:0016876	nucleotide binding // aminoacyl-tRNA ligase activity // threonine-tRNA ligase activity // ATP binding // ligase activity // ligase activity, forming aminoacyl-tRNA and related compounds	---	---
10428842	0.657666	0.0012758	Tatdn1	NM_175151	RefSeq	Mus musculus TatD DNase domain containing 1 (Tatdn1), mRNA.	FALSE	GO:0008150	biological_process	GO:0005575 // GO:0005634	cellular_component // nucleus	GO:0004518 // GO:0016787 // GO:0016888 // GO:0046872	nuclease activity // hydrolase activity // endodeoxyribonuclease activity, producing 5'-phosphomonoesters // metal ion binding	---	---
10429140	1.66616	2.54717e-08	Ndrg1	NM_008681	RefSeq	Mus musculus N-myc downstream regulated gene 1 (Ndrg1), mRNA.	FALSE	GO:0032287 // GO:0045576 // GO:0090232	peripheral nervous system myelin maintenance // mast cell activation // positive regulation of spindle checkpoint	GO:0005634 // GO:0005737 // GO:0005737 // GO:0005813 // GO:0005856 // GO:0005874 // GO:0005886 // GO:0005913 // GO:0015630 // GO:0016020 // GO:0048471 // GO:0055038	nucleus // cytoplasm // cytoplasm // centrosome // cytoskeleton // microtubule // plasma membrane // cell-cell adherens junction // microtubule cytoskeleton // membrane // perinuclear region of cytoplasm // recycling endosome membrane	GO:0008017 // GO:0017137 // GO:0043015 // GO:0045296	microtubule binding // Rab GTPase binding // gamma-tubulin binding // cadherin binding	---	---
10431035	0.791539	0.00060255	Ttll12	NM_183017	RefSeq	Mus musculus tubulin tyrosine ligase-like family, member 12 (Ttll12), mRNA.	FALSE	GO:0006464 // GO:0008150	cellular protein modification process // biological_process	GO:0005575	cellular_component	GO:0003674 // GO:0004835	molecular_function // tubulin-tyrosine ligase activity	---	---
10431229	1.02541	0.000908176	Celsr1	NM_009886	RefSeq	Mus musculus cadherin, EGF LAG seven-pass G-type receptor 1 (flamingo homolog, Drosophila) (Celsr1), mRNA.	FALSE	GO:0001702 // GO:0001736 // GO:0001764 // GO:0001843 // GO:0001843 // GO:0001942 // GO:0007155 // GO:0007156 // GO:0007165 // GO:0007166 // GO:0007186 // GO:0007218 // GO:0007266 // GO:0007267 // GO:0007275 // GO:0007417 // GO:0007626 // GO:0009952 // GO:0032956 // GO:0042060 // GO:0042249 // GO:0042472 // GO:0045176 // GO:0046928 // GO:0048105 // GO:0060488 // GO:0060489 // GO:0060490 // GO:0090…	gastrulation with mouth forming second // establishment of planar polarity // neuron migration // neural tube closure // neural tube closure // hair follicle development // cell adhesion // homophilic cell adhesion // signal transduction // cell surface receptor signaling pathway // G-protein coupled receptor signaling pathway // neuropeptide signaling pathway // Rho protein signal transduction /…	GO:0005886 // GO:0005887 // GO:0016020 // GO:0016021	plasma membrane // integral to plasma membrane // membrane // integral to membrane	GO:0004871 // GO:0004872 // GO:0004888 // GO:0004930 // GO:0005509 // GO:0005515 // GO:0046983	signal transducer activity // receptor activity // transmembrane signaling receptor activity // G-protein coupled receptor activity // calcium ion binding // protein binding // protein dimerization activity	---	---
10431546	0.79486	0.000120473	Tymp	NM_138302	RefSeq	Mus musculus thymidine phosphorylase (Tymp), mRNA.	FALSE	GO:0006206 // GO:0006213 // GO:0006935 // GO:0008152 // GO:0009887	pyrimidine base metabolic process // pyrimidine nucleoside metabolic process // chemotaxis // metabolic process // organ morphogenesis	---	---	GO:0004645 // GO:0009032 // GO:0016154 // GO:0016740 // GO:0016757 // GO:0016763	phosphorylase activity // thymidine phosphorylase activity // pyrimidine-nucleoside phosphorylase activity // transferase activity // transferase activity, transferring glycosyl groups // transferase activity, transferring pentosyl groups	---	---
10432640	1.55022	0.00469276	---	ENSMUST00000100198	ENSEMBL	cdna:known chromosome:NCBIM37:15:100475214:100499933:-1 gene:ENSMUSG00000075411 gene_biotype:protein_coding transcript_biotype:protein_coding	FALSE	---	---	---	---	---	---	---	---
10438098	1.29661	0.000160554	Sdf2l1	NM_022324	RefSeq	Mus musculus stromal cell-derived factor 2-like 1 (Sdf2l1), mRNA.	FALSE	GO:0008150	biological_process	GO:0005783 // GO:0016020	endoplasmic reticulum // membrane	GO:0003674	molecular_function	---	---
10438769	0.737492	0.000815005	Cldn1	NM_016674	RefSeq	Mus musculus claudin 1 (Cldn1), mRNA.	FALSE	GO:0016338 // GO:0045216	calcium-independent cell-cell adhesion // cell-cell junction organization	GO:0005886 // GO:0005923 // GO:0005923 // GO:0016020 // GO:0016021 // GO:0016328 // GO:0030054	plasma membrane // tight junction // tight junction // membrane // integral to membrane // lateral plasma membrane // cell junction	GO:0005198 // GO:0005515 // GO:0042802	structural molecule activity // protein binding // identical protein binding	---	---
10439021	0.635082	0.00247402	Senp5	NM_177103	RefSeq	Mus musculus SUMO/sentrin specific peptidase 5 (Senp5), mRNA.	FALSE	GO:0006508 // GO:0007049 // GO:0008150 // GO:0051301	proteolysis // cell cycle // biological_process // cell division	GO:0005575 // GO:0005634	cellular_component // nucleus	GO:0003674 // GO:0008233 // GO:0008234 // GO:0016787	molecular_function // peptidase activity // cysteine-type peptidase activity // hydrolase activity	---	---
10439404	0.786665	0.000612769	---	GENSCAN00000011522	ENSEMBL	cdna:genscan chromosome:NCBIM37:16:37841403:37859330:-1 transcript_biotype:protein_coding	FALSE	---	---	---	---	---	---	---	---
10442629	0.645027	0.00385592	Spsb3	NM_001163750	RefSeq	Mus musculus splA/ryanodine receptor domain and SOCS box containing 3 (Spsb3), transcript variant 1, mRNA.	FALSE	GO:0008150 // GO:0035556	biological_process // intracellular signal transduction	GO:0005575	cellular_component	GO:0003674	molecular_function	---	---
10443463	1.23384	0.000852483	Cdkn1a	NM_007669	RefSeq	Mus musculus cyclin-dependent kinase inhibitor 1A (P21) (Cdkn1a), transcript variant 1, mRNA.	FALSE	GO:0000079 // GO:0000082 // GO:0000086 // GO:0001934 // GO:0006974 // GO:0006974 // GO:0006977 // GO:0007049 // GO:0007050 // GO:0007050 // GO:0007050 // GO:0007346 // GO:0008285 // GO:0008285 // GO:0009411 // GO:0010629 // GO:0016310 // GO:0030308 // GO:0030890 // GO:0031668 // GO:0033158 // GO:0042326 // GO:0042326 // GO:0043066 // GO:0043068 // GO:0043085 // GO:0043086 // GO:0045736 // GO:0045…	regulation of cyclin-dependent protein kinase activity // G1/S transition of mitotic cell cycle // G2/M transition of mitotic cell cycle // positive regulation of protein phosphorylation // response to DNA damage stimulus // response to DNA damage stimulus // DNA damage response, signal transduction by p53 class mediator resulting in cell cycle arrest // cell cycle // cell cycle arrest // cell cy…	GO:0000307 // GO:0000307 // GO:0005634 // GO:0005634 // GO:0005737 // GO:0005737 // GO:0005829 // GO:0070557	cyclin-dependent protein kinase holoenzyme complex // cyclin-dependent protein kinase holoenzyme complex // nucleus // nucleus // cytoplasm // cytoplasm // cytosol // PCNA-p21 complex	GO:0004860 // GO:0004861 // GO:0005515 // GO:0016301 // GO:0019912 // GO:0030332 // GO:0032403 // GO:0046872	protein kinase inhibitor activity // cyclin-dependent protein kinase inhibitor activity // protein binding // kinase activity // cyclin-dependent protein kinase activating kinase activity // cyclin binding // protein complex binding // metal ion binding	---	---
10447222	1.01664	0.00458273	---	ENSMUST00000083385	ENSEMBL	ncrna:snRNA chromosome:NCBIM37:17:85023742:85023850:1 gene:ENSMUSG00000065319 gene_biotype:snRNA transcript_biotype:snRNA	FALSE	---	---	---	---	---	---	---	---
10448803	0.780876	1.43241e-05	Hn1l	NM_198937	RefSeq	Mus musculus hematological and neurological expressed 1-like (Hn1l), mRNA.	FALSE	---	---	GO:0005634 // GO:0005737 // GO:0005886	nucleus // cytoplasm // plasma membrane	---	---	---	---
10450605	0.787852	4.93528e-05	Tubb5	NM_011655	RefSeq	Mus musculus tubulin, beta 5 class I (Tubb5), mRNA.	FALSE	GO:0006184 // GO:0007017 // GO:0007017 // GO:0007018 // GO:0009987 // GO:0051225 // GO:0051258	GTP catabolic process // microtubule-based process // microtubule-based process // microtubule-based movement // cellular process // spindle assembly // protein polymerization	GO:0005634 // GO:0005641 // GO:0005737 // GO:0005856 // GO:0005874 // GO:0005874 // GO:0043234 // GO:0044297 // GO:0045298	nucleus // nuclear envelope lumen // cytoplasm // cytoskeleton // microtubule // microtubule // protein complex // cell body // tubulin complex	GO:0000166 // GO:0003924 // GO:0005198 // GO:0005200 // GO:0005525 // GO:0032403 // GO:0042288	nucleotide binding // GTPase activity // structural molecule activity // structural constituent of cytoskeleton // GTP binding // protein complex binding // MHC class I protein binding	---	---
10452000	0.7077	0.00297847	Dpp9	NM_172624	RefSeq	Mus musculus dipeptidylpeptidase 9 (Dpp9), mRNA.	FALSE	GO:0006508	proteolysis	GO:0005737 // GO:0016020	cytoplasm // membrane	GO:0003674 // GO:0004177 // GO:0008233 // GO:0008236 // GO:0016787	molecular_function // aminopeptidase activity // peptidase activity // serine-type peptidase activity // hydrolase activity	---	---
10454198	1.10601	0.000116885	Rnf125	NM_026301	RefSeq	Mus musculus ring finger protein 125 (Rnf125), mRNA.	FALSE	GO:0008150	biological_process	GO:0005575 // GO:0005622	cellular_component // intracellular	GO:0008270 // GO:0016874 // GO:0046872	zinc ion binding // ligase activity // metal ion binding	---	---
10454478	0.598605	0.000729828	Polr2d	NM_027002	RefSeq	Mus musculus polymerase (RNA) II (DNA directed) polypeptide D (Polr2d), transcript variant 1, mRNA.	FALSE	GO:0006351 // GO:0006366 // GO:0006468 // GO:0044237	transcription, DNA-dependent // transcription from RNA polymerase II promoter // protein phosphorylation // cellular metabolic process	GO:0005634 // GO:0005665	nucleus // DNA-directed RNA polymerase II, core complex	GO:0000166 // GO:0003824 // GO:0003899	nucleotide binding // catalytic activity // DNA-directed RNA polymerase activity	---	---
10456254	0.740627	6.89534e-05	Nedd4l	NM_001114386	RefSeq	Mus musculus neural precursor cell expressed, developmentally down-regulated gene 4-like (Nedd4l), transcript variant 1, mRNA.	FALSE	GO:0006464 // GO:0010038 // GO:0010766 // GO:0010766 // GO:0042787	cellular protein modification process // response to metal ion // negative regulation of sodium ion transport // negative regulation of sodium ion transport // protein ubiquitination involved in ubiquitin-dependent protein catabolic process	GO:0005622 // GO:0005634 // GO:0005737	intracellular // nucleus // cytoplasm	GO:0004842 // GO:0005515 // GO:0016874 // GO:0016881 // GO:0017080 // GO:0019871	ubiquitin-protein ligase activity // protein binding // ligase activity // acid-amino acid ligase activity // sodium channel regulator activity // sodium channel inhibitor activity	---	---
10458547	0.677518	0.00330687	Gnpda1	NM_011937	RefSeq	Mus musculus glucosamine-6-phosphate deaminase 1 (Gnpda1), mRNA.	FALSE	GO:0005975 // GO:0006002 // GO:0006041 // GO:0006043 // GO:0006044 // GO:0006091 // GO:0007340 // GO:0008152 // GO:0046370	carbohydrate metabolic process // fructose 6-phosphate metabolic process // glucosamine metabolic process // glucosamine catabolic process // N-acetylglucosamine metabolic process // generation of precursor metabolites and energy // acrosome reaction // metabolic process // fructose biosynthetic process	GO:0005737	cytoplasm	GO:0004342 // GO:0004342 // GO:0016787	glucosamine-6-phosphate deaminase activity // glucosamine-6-phosphate deaminase activity // hydrolase activity	---	---
10460221	1.77914	3.4569e-06	Chka	ENSMUST00000072055	ENSEMBL	cdna:known chromosome:NCBIM37:19:3851797:3894369:1 gene:ENSMUSG00000024843 gene_biotype:protein_coding transcript_biotype:protein_coding	FALSE	GO:0006646 // GO:0006656 // GO:0006656 // GO:0006657 // GO:0006657 // GO:0008654 // GO:0016310 // GO:0019695	phosphatidylethanolamine biosynthetic process // phosphatidylcholine biosynthetic process // phosphatidylcholine biosynthetic process // CDP-choline pathway // CDP-choline pathway // phospholipid biosynthetic process // phosphorylation // choline metabolic process	GO:0005737	cytoplasm	GO:0000166 // GO:0004103 // GO:0004103 // GO:0004104 // GO:0004305 // GO:0005524 // GO:0008144 // GO:0016301 // GO:0016740 // GO:0016772 // GO:0016773 // GO:0033265 // GO:0042803	nucleotide binding // choline kinase activity // choline kinase activity // cholinesterase activity // ethanolamine kinase activity // ATP binding // drug binding // kinase activity // transferase activity // transferase activity, transferring phosphorus-containing groups // phosphotransferase activity, alcohol group as acceptor // choline binding // protein homodimerization activity	---	---
10461758	1.19286	0.00494015	Keg1	NM_029550	RefSeq	Mus musculus kidney expressed gene 1 (Keg1), mRNA.	FALSE	---	---	GO:0005737 // GO:0005739 // GO:0005813 // GO:0005856 // GO:0005874	cytoplasm // mitochondrion // centrosome // cytoskeleton // microtubule	GO:0016740 // GO:0016746 // GO:0047961	transferase activity // transferase activity, transferring acyl groups // glycine N-acyltransferase activity	---	---
10462195	0.868448	0.000456121	Kank1	NM_181404	RefSeq	Mus musculus KN motif and ankyrin repeat domains 1 (Kank1), mRNA.	FALSE	GO:0030837	negative regulation of actin filament polymerization	GO:0005737	cytoplasm	GO:0003674	molecular_function	---	---
10466304	1.16878	3.68097e-07	Dtx4	NM_172442	RefSeq	Mus musculus deltex 4 homolog (Drosophila) (Dtx4), mRNA.	FALSE	GO:0007219 // GO:0008150	Notch signaling pathway // biological_process	GO:0005575 // GO:0005737	cellular_component // cytoplasm	GO:0008270 // GO:0016874 // GO:0046872	zinc ion binding // ligase activity // metal ion binding	---	---
10466976	0.802016	0.000142929	Gldc	NM_138595	RefSeq	Mus musculus glycine decarboxylase (Gldc), nuclear gene encoding mitochondrial protein, mRNA.	FALSE	GO:0006520 // GO:0006544 // GO:0019464 // GO:0055114	cellular amino acid metabolic process // glycine metabolic process // glycine decarboxylation via glycine cleavage system // oxidation-reduction process	GO:0005739 // GO:0005739 // GO:0005960	mitochondrion // mitochondrion // glycine cleavage complex	GO:0003824 // GO:0004375 // GO:0016491 // GO:0016594 // GO:0016829 // GO:0019899 // GO:0030170 // GO:0042803 // GO:0046983	catalytic activity // glycine dehydrogenase (decarboxylating) activity // oxidoreductase activity // glycine binding // lyase activity // enzyme binding // pyridoxal phosphate binding // protein homodimerization activity // protein dimerization activity	---	---
10467206	1.4593	2.47435e-05	Ppp1r3c	ENSMUST00000087321	ENSEMBL	cdna:known chromosome:NCBIM37:19:36806227:36811143:-1 gene:ENSMUSG00000067279 gene_biotype:protein_coding transcript_biotype:protein_coding	FALSE	GO:0005975 // GO:0005977 // GO:0005978 // GO:0005979 // GO:0005981 // GO:0006605	carbohydrate metabolic process // glycogen metabolic process // glycogen biosynthetic process // regulation of glycogen biosynthetic process // regulation of glycogen catabolic process // protein targeting	GO:0005625 // GO:0005792 // GO:0042587	soluble fraction // microsome // glycogen granule	GO:0004721 // GO:0019899 // GO:0019903	phosphoprotein phosphatase activity // enzyme binding // protein phosphatase binding	---	---
10469110	0.675633	0.0013832	Usp6nl	NM_181399	RefSeq	Mus musculus USP6 N-terminal like (Usp6nl), transcript variant 1, mRNA.	FALSE	GO:0008150 // GO:0032313	biological_process // regulation of Rab GTPase activity	GO:0005575 // GO:0005622	cellular_component // intracellular	GO:0003674 // GO:0005096 // GO:0005097	molecular_function // GTPase activator activity // Rab GTPase activator activity	---	---
10472300	0.713763	0.000256728	Psmd14	NM_021526	RefSeq	Mus musculus proteasome (prosome, macropain) 26S subunit, non-ATPase, 14 (Psmd14), mRNA.	FALSE	GO:0006508 // GO:0008152 // GO:0010950 // GO:0061136	proteolysis // metabolic process // positive regulation of endopeptidase activity // regulation of proteasomal protein catabolic process	GO:0000502	proteasome complex	GO:0004175 // GO:0008233 // GO:0008237 // GO:0016787 // GO:0046872 // GO:0061133 // GO:0070628	endopeptidase activity // peptidase activity // metallopeptidase activity // hydrolase activity // metal ion binding // endopeptidase activator activity // proteasome binding	---	---
10472538	1.61836	0.00205727	Dhrs9	NM_175512	RefSeq	Mus musculus dehydrogenase/reductase (SDR family) member 9 (Dhrs9), mRNA.	FALSE	GO:0008152 // GO:0008209 // GO:0042448 // GO:0042904 // GO:0055114	metabolic process // androgen metabolic process // progesterone metabolic process // 9-cis-retinoic acid biosynthetic process // oxidation-reduction process	GO:0005737 // GO:0005783 // GO:0005792 // GO:0016020 // GO:0030176	cytoplasm // endoplasmic reticulum // microsome // membrane // integral to endoplasmic reticulum membrane	GO:0000166 // GO:0004022 // GO:0004745 // GO:0016491 // GO:0047035	nucleotide binding // alcohol dehydrogenase (NAD) activity // retinol dehydrogenase activity // oxidoreductase activity // testosterone dehydrogenase (NAD+) activity	---	---
10474181	0.812605	0.000184179	Abtb2	NM_178890	RefSeq	Mus musculus ankyrin repeat and BTB (POZ) domain containing 2 (Abtb2), mRNA.	FALSE	GO:0008150	biological_process	GO:0005575	cellular_component	GO:0003674 // GO:0003677	molecular_function // DNA binding	---	---
10477325	0.871928	7.83198e-05	Dnmt3b	NM_001003961	RefSeq	Mus musculus DNA methyltransferase 3B (Dnmt3b), transcript variant 1, mRNA.	FALSE	GO:0000122 // GO:0006306 // GO:0006346 // GO:0006349 // GO:0010424 // GO:0010628 // GO:0031503 // GO:0032259 // GO:0045666 // GO:0045814 // GO:0045892 // GO:0046498 // GO:0046499 // GO:0051571 // GO:0051573 // GO:0071230 // GO:0090116 // GO:0090116 // GO:0090116	negative regulation of transcription from RNA polymerase II promoter // DNA methylation // methylation-dependent chromatin silencing // regulation of gene expression by genetic imprinting // DNA methylation on cytosine within a CG sequence // positive regulation of gene expression // protein complex localization // methylation // positive regulation of neuron differentiation // negative regulatio…	GO:0000775 // GO:0000792 // GO:0005634 // GO:0005634 // GO:0005720 // GO:0005737 // GO:0043231	chromosome, centromeric region // heterochromatin // nucleus // nucleus // nuclear heterochromatin // cytoplasm // intracellular membrane-bounded organelle	GO:0003677 // GO:0003714 // GO:0003886 // GO:0003886 // GO:0003886 // GO:0005515 // GO:0008168 // GO:0016740 // GO:0045322 // GO:0046872 // GO:0051718	DNA binding // transcription corepressor activity // DNA (cytosine-5-)-methyltransferase activity // DNA (cytosine-5-)-methyltransferase activity // DNA (cytosine-5-)-methyltransferase activity // protein binding // methyltransferase activity // transferase activity // unmethylated CpG binding // metal ion binding // DNA (cytosine-5-)-methyltransferase activity, acting on CpG substrates	---	---
10478326	0.622864	0.00479613	Sgk2	NM_013731	RefSeq	Mus musculus serum/glucocorticoid regulated kinase 2 (Sgk2), mRNA.	FALSE	GO:0006468 // GO:0016310	protein phosphorylation // phosphorylation	GO:0005634 // GO:0005737	nucleus // cytoplasm	GO:0000166 // GO:0004672 // GO:0004674 // GO:0005524 // GO:0015459 // GO:0016301 // GO:0016740 // GO:0016772	nucleotide binding // protein kinase activity // protein serine/threonine kinase activity // ATP binding // potassium channel regulator activity // kinase activity // transferase activity // transferase activity, transferring phosphorus-containing groups	---	---
10479154	0.977028	4.39336e-05	Tubb1	NM_001080971	RefSeq	Mus musculus tubulin, beta 1 class VI (Tubb1), mRNA.	FALSE	GO:0006184 // GO:0007017 // GO:0007018 // GO:0051225 // GO:0051258	GTP catabolic process // microtubule-based process // microtubule-based movement // spindle assembly // protein polymerization	GO:0005737 // GO:0005856 // GO:0005874 // GO:0043234	cytoplasm // cytoskeleton // microtubule // protein complex	GO:0000166 // GO:0003924 // GO:0005198 // GO:0005200 // GO:0005525	nucleotide binding // GTPase activity // structural molecule activity // structural constituent of cytoskeleton // GTP binding	---	---
10480628	0.74116	0.00139992	Tubb4b	NM_146116	RefSeq	Mus musculus tubulin, beta 4B class IVB (Tubb4b), mRNA.	FALSE	GO:0006184 // GO:0007017 // GO:0007018 // GO:0051258	GTP catabolic process // microtubule-based process // microtubule-based movement // protein polymerization	GO:0005737 // GO:0005856 // GO:0005874 // GO:0043234 // GO:0045298	cytoplasm // cytoskeleton // microtubule // protein complex // tubulin complex	GO:0000166 // GO:0003924 // GO:0005198 // GO:0005525	nucleotide binding // GTPase activity // structural molecule activity // GTP binding	---	---
10481804	0.674275	0.00327037	Ralgps1	NM_175211	RefSeq	Mus musculus Ral GEF with PH domain and SH3 binding motif 1 (Ralgps1), mRNA.	FALSE	GO:0007264 // GO:0008150	small GTPase mediated signal transduction // biological_process	GO:0005575 // GO:0005622 // GO:0005737 // GO:0005886 // GO:0016020	cellular_component // intracellular // cytoplasm // plasma membrane // membrane	GO:0003674 // GO:0005085 // GO:0005543	molecular_function // guanyl-nucleotide exchange factor activity // phospholipid binding	---	---
10485656	0.66458	0.000362554	Elp4	ENSMUST00000122965	ENSEMBL	cdna:known chromosome:NCBIM37:2:105537477:105744721:-1 gene:ENSMUSG00000027167 gene_biotype:protein_coding transcript_biotype:protein_coding	FALSE	GO:0006351 // GO:0006355 // GO:0006357 // GO:0016573	transcription, DNA-dependent // regulation of transcription, DNA-dependent // regulation of transcription from RNA polymerase II promoter // histone acetylation	GO:0005634 // GO:0005737 // GO:0008023 // GO:0016591 // GO:0033588	nucleus // cytoplasm // transcription elongation factor complex // DNA-directed RNA polymerase II, holoenzyme // Elongator holoenzyme complex	GO:0008607	phosphorylase kinase regulator activity	---	---
10487252	0.658435	0.00120818	Gabpb1	ENSMUST00000103227	ENSEMBL	cdna:known chromosome:NCBIM37:2:126454651:126501280:-1 gene:ENSMUSG00000027361 gene_biotype:protein_coding transcript_biotype:protein_coding	FALSE	GO:0006351 // GO:0006355 // GO:0045944	transcription, DNA-dependent // regulation of transcription, DNA-dependent // positive regulation of transcription from RNA polymerase II promoter	GO:0005634	nucleus	GO:0044212 // GO:0046982	transcription regulatory region DNA binding // protein heterodimerization activity	---	---
10491106	0.672202	0.00311018	Pld1	NM_001164056	RefSeq	Mus musculus phospholipase D1 (Pld1), transcript variant 1, mRNA.	FALSE	GO:0006654 // GO:0008654 // GO:0009395 // GO:0030335 // GO:0043434 // GO:0050830	phosphatidic acid biosynthetic process // phospholipid biosynthetic process // phospholipid catabolic process // positive regulation of cell migration // response to peptide hormone stimulus // defense response to Gram-positive bacterium	GO:0005768 // GO:0005792 // GO:0005794 // GO:0030027 // GO:0031982 // GO:0031985	endosome // microsome // Golgi apparatus // lamellipodium // vesicle // Golgi cisterna	GO:0004630	phospholipase D activity	---	---
10491564	0.837194	1.09415e-05	4932438A13Rik	NM_172679	RefSeq	Mus musculus RIKEN cDNA 4932438A13 gene (4932438A13Rik), mRNA.	FALSE	GO:0001558 // GO:0006629 // GO:0007283 // GO:0009235 // GO:0019915 // GO:0045444 // GO:0051647 // GO:0060612	regulation of cell growth // lipid metabolic process // spermatogenesis // cobalamin metabolic process // lipid storage // fat cell differentiation // nucleus localization // adipose tissue development	GO:0005634 // GO:0005739 // GO:0016020 // GO:0016021	nucleus // mitochondrion // membrane // integral to membrane	GO:0003674	molecular_function	---	---
10491595	0.720518	0.000118954	---	---	---	---	---	---	---	---	---	---	---	---	---
10491597	0.880681	7.85459e-05	4932438A13Rik	NM_172679	RefSeq	Mus musculus RIKEN cDNA 4932438A13 gene (4932438A13Rik), mRNA.	FALSE	GO:0001558 // GO:0006629 // GO:0007283 // GO:0009235 // GO:0019915 // GO:0045444 // GO:0051647 // GO:0060612	regulation of cell growth // lipid metabolic process // spermatogenesis // cobalamin metabolic process // lipid storage // fat cell differentiation // nucleus localization // adipose tissue development	GO:0005634 // GO:0005739 // GO:0016020 // GO:0016021	nucleus // mitochondrion // membrane // integral to membrane	GO:0003674	molecular_function	---	---
10491599	1.03091	0.000115024	---	GENSCAN00000041066	ENSEMBL	cdna:genscan chromosome:NCBIM37:3:36772701:36907405:1 transcript_biotype:protein_coding	FALSE	---	---	---	---	---	---	---	---
10491601	1.02824	0.000514033	---	GENSCAN00000041066	ENSEMBL	cdna:genscan chromosome:NCBIM37:3:36772701:36907405:1 transcript_biotype:protein_coding	FALSE	---	---	---	---	---	---	---	---
10491603	0.784892	6.49638e-05	---	GENSCAN00000041066	ENSEMBL	cdna:genscan chromosome:NCBIM37:3:36772701:36907405:1 transcript_biotype:protein_coding	FALSE	---	---	---	---	---	---	---	---
10491605	0.880538	1.25728e-05	4932438A13Rik	NM_172679	RefSeq	Mus musculus RIKEN cDNA 4932438A13 gene (4932438A13Rik), mRNA.	FALSE	GO:0001558 // GO:0006629 // GO:0007283 // GO:0009235 // GO:0019915 // GO:0045444 // GO:0051647 // GO:0060612	regulation of cell growth // lipid metabolic process // spermatogenesis // cobalamin metabolic process // lipid storage // fat cell differentiation // nucleus localization // adipose tissue development	GO:0005634 // GO:0005739 // GO:0016020 // GO:0016021	nucleus // mitochondrion // membrane // integral to membrane	GO:0003674	molecular_function	---	---
10491607	0.968278	6.76414e-05	4932438A13Rik	NM_172679	RefSeq	Mus musculus RIKEN cDNA 4932438A13 gene (4932438A13Rik), mRNA.	FALSE	GO:0001558 // GO:0006629 // GO:0007283 // GO:0009235 // GO:0019915 // GO:0045444 // GO:0051647 // GO:0060612	regulation of cell growth // lipid metabolic process // spermatogenesis // cobalamin metabolic process // lipid storage // fat cell differentiation // nucleus localization // adipose tissue development	GO:0005634 // GO:0005739 // GO:0016020 // GO:0016021	nucleus // mitochondrion // membrane // integral to membrane	GO:0003674	molecular_function	---	---
10491609	0.880447	7.42313e-06	4932438A13Rik	NM_172679	RefSeq	Mus musculus RIKEN cDNA 4932438A13 gene (4932438A13Rik), mRNA.	FALSE	GO:0001558 // GO:0006629 // GO:0007283 // GO:0009235 // GO:0019915 // GO:0045444 // GO:0051647 // GO:0060612	regulation of cell growth // lipid metabolic process // spermatogenesis // cobalamin metabolic process // lipid storage // fat cell differentiation // nucleus localization // adipose tissue development	GO:0005634 // GO:0005739 // GO:0016020 // GO:0016021	nucleus // mitochondrion // membrane // integral to membrane	GO:0003674	molecular_function	---	---
10491611	0.84367	7.15904e-06	---	---	---	---	---	---	---	---	---	---	---	---	---
10491613	0.962817	8.73799e-06	---	---	---	---	---	---	---	---	---	---	---	---	---
10491615	0.876429	0.000210152	---	---	---	---	---	---	---	---	---	---	---	---	---
10491617	0.862623	2.84806e-06	4932438A13Rik	NM_172679	RefSeq	Mus musculus RIKEN cDNA 4932438A13 gene (4932438A13Rik), mRNA.	FALSE	GO:0001558 // GO:0006629 // GO:0007283 // GO:0009235 // GO:0019915 // GO:0045444 // GO:0051647 // GO:0060612	regulation of cell growth // lipid metabolic process // spermatogenesis // cobalamin metabolic process // lipid storage // fat cell differentiation // nucleus localization // adipose tissue development	GO:0005634 // GO:0005739 // GO:0016020 // GO:0016021	nucleus // mitochondrion // membrane // integral to membrane	GO:0003674	molecular_function	---	---
10491619	0.887673	2.38929e-05	---	GENSCAN00000041066	ENSEMBL	cdna:genscan chromosome:NCBIM37:3:36772701:36907405:1 transcript_biotype:protein_coding	FALSE	---	---	---	---	---	---	---	---
10491621	1.0558	2.50911e-06	4932438A13Rik	NM_172679	RefSeq	Mus musculus RIKEN cDNA 4932438A13 gene (4932438A13Rik), mRNA.	FALSE	GO:0001558 // GO:0006629 // GO:0007283 // GO:0009235 // GO:0019915 // GO:0045444 // GO:0051647 // GO:0060612	regulation of cell growth // lipid metabolic process // spermatogenesis // cobalamin metabolic process // lipid storage // fat cell differentiation // nucleus localization // adipose tissue development	GO:0005634 // GO:0005739 // GO:0016020 // GO:0016021	nucleus // mitochondrion // membrane // integral to membrane	GO:0003674	molecular_function	---	---
10491623	0.84306	9.04154e-06	4932438A13Rik	NM_172679	RefSeq	Mus musculus RIKEN cDNA 4932438A13 gene (4932438A13Rik), mRNA.	FALSE	GO:0001558 // GO:0006629 // GO:0007283 // GO:0009235 // GO:0019915 // GO:0045444 // GO:0051647 // GO:0060612	regulation of cell growth // lipid metabolic process // spermatogenesis // cobalamin metabolic process // lipid storage // fat cell differentiation // nucleus localization // adipose tissue development	GO:0005634 // GO:0005739 // GO:0016020 // GO:0016021	nucleus // mitochondrion // membrane // integral to membrane	GO:0003674	molecular_function	---	---
10491625	0.791835	0.000100228	4932438A13Rik	NM_172679	RefSeq	Mus musculus RIKEN cDNA 4932438A13 gene (4932438A13Rik), mRNA.	FALSE	GO:0001558 // GO:0006629 // GO:0007283 // GO:0009235 // GO:0019915 // GO:0045444 // GO:0051647 // GO:0060612	regulation of cell growth // lipid metabolic process // spermatogenesis // cobalamin metabolic process // lipid storage // fat cell differentiation // nucleus localization // adipose tissue development	GO:0005634 // GO:0005739 // GO:0016020 // GO:0016021	nucleus // mitochondrion // membrane // integral to membrane	GO:0003674	molecular_function	---	---
10491627	0.820752	5.76388e-05	4932438A13Rik	NM_172679	RefSeq	Mus musculus RIKEN cDNA 4932438A13 gene (4932438A13Rik), mRNA.	FALSE	GO:0001558 // GO:0006629 // GO:0007283 // GO:0009235 // GO:0019915 // GO:0045444 // GO:0051647 // GO:0060612	regulation of cell growth // lipid metabolic process // spermatogenesis // cobalamin metabolic process // lipid storage // fat cell differentiation // nucleus localization // adipose tissue development	GO:0005634 // GO:0005739 // GO:0016020 // GO:0016021	nucleus // mitochondrion // membrane // integral to membrane	GO:0003674	molecular_function	---	---
10491629	0.876151	3.40878e-05	4932438A13Rik	NM_172679	RefSeq	Mus musculus RIKEN cDNA 4932438A13 gene (4932438A13Rik), mRNA.	FALSE	GO:0001558 // GO:0006629 // GO:0007283 // GO:0009235 // GO:0019915 // GO:0045444 // GO:0051647 // GO:0060612	regulation of cell growth // lipid metabolic process // spermatogenesis // cobalamin metabolic process // lipid storage // fat cell differentiation // nucleus localization // adipose tissue development	GO:0005634 // GO:0005739 // GO:0016020 // GO:0016021	nucleus // mitochondrion // membrane // integral to membrane	GO:0003674	molecular_function	---	---
10499045	0.814894	0.000572687	Trim2	ENSMUST00000107691	ENSEMBL	cdna:known chromosome:NCBIM37:3:83964362:84063734:-1 gene:ENSMUSG00000027993 gene_biotype:protein_coding transcript_biotype:protein_coding	FALSE	GO:0008152 // GO:0016567 // GO:0043526 // GO:0043526	metabolic process // protein ubiquitination // neuroprotection // neuroprotection	GO:0005622 // GO:0005737 // GO:0005737	intracellular // cytoplasm // cytoplasm	GO:0004842 // GO:0005515 // GO:0008270 // GO:0016874 // GO:0017022 // GO:0046872	ubiquitin-protein ligase activity // protein binding // zinc ion binding // ligase activity // myosin binding // metal ion binding	---	---
10505268	0.978348	0.00312202	---	ENSMUST00000098035	ENSEMBL	cdna:known chromosome:NCBIM37:4:61458660:61461271:1 gene:ENSMUSG00000081207 gene_biotype:processed_transcript transcript_biotype:processed_transcript	FALSE	---	---	---	---	---	---	---	---
10506213	1.19665	0.000933571	Ube2u	NM_001033773	RefSeq	Mus musculus ubiquitin-conjugating enzyme E2U (putative) (Ube2u), mRNA.	FALSE	GO:0008150	biological_process	GO:0005575	cellular_component	GO:0003674	molecular_function	---	---
10510270	1.27232	9.78413e-06	Mthfr	NM_001161798	RefSeq	Mus musculus 5,10-methylenetetrahydrofolate reductase (Mthfr), transcript variant 1, mRNA.	FALSE	GO:0006555 // GO:0008152 // GO:0009086 // GO:0046653 // GO:0050667 // GO:0055114 // GO:0055114	methionine metabolic process // metabolic process // methionine biosynthetic process // tetrahydrofolate metabolic process // homocysteine metabolic process // oxidation-reduction process // oxidation-reduction process	GO:0005625	soluble fraction	GO:0003824 // GO:0004489 // GO:0004489 // GO:0016491 // GO:0050660 // GO:0050661 // GO:0072341	catalytic activity // methylenetetrahydrofolate reductase (NADPH) activity // methylenetetrahydrofolate reductase (NADPH) activity // oxidoreductase activity // flavin adenine dinucleotide binding // NADP binding // modified amino acid binding	---	---
10510286	1.18168	9.11922e-06	Mad2l2	NM_027985	RefSeq	Mus musculus MAD2 mitotic arrest deficient-like 2 (Mad2l2), mRNA.	FALSE	GO:0001558 // GO:0006302 // GO:0006351 // GO:0006355 // GO:0006974 // GO:0007049 // GO:0007067 // GO:0033138 // GO:0042177 // GO:0042772 // GO:0045893 // GO:0051301 // GO:0060564	regulation of cell growth // double-strand break repair // transcription, DNA-dependent // regulation of transcription, DNA-dependent // response to DNA damage stimulus // cell cycle // mitosis // positive regulation of peptidyl-serine phosphorylation // negative regulation of protein catabolic process // DNA damage response, signal transduction resulting in transcription // positive regulation o…	GO:0005634 // GO:0005737 // GO:0005819 // GO:0005856 // GO:0016035	nucleus // cytoplasm // spindle // cytoskeleton // zeta DNA polymerase complex	GO:0008432	JUN kinase binding	GenMAPP	Cell_Cycle_KEGG
10511935	0.825199	1.01243e-05	Pnrc1	NM_001033225	RefSeq	Mus musculus proline-rich nuclear receptor coactivator 1 (Pnrc1), mRNA.	FALSE	GO:0008150	biological_process	GO:0005575	cellular_component	GO:0003674 // GO:0004872	molecular_function // receptor activity	---	---
10515649	0.659508	0.000630155	Szt2	NM_198170	RefSeq	Mus musculus seizure threshold 2 (Szt2), mRNA.	FALSE	GO:0007417 // GO:0009791 // GO:0043473	central nervous system development // post-embryonic development // pigmentation	GO:0005777	peroxisome	GO:0003674	molecular_function	---	---
10515731	0.69884	0.000447585	Szt2	NM_198170	RefSeq	Mus musculus seizure threshold 2 (Szt2), mRNA.	FALSE	GO:0007417 // GO:0009791 // GO:0043473	central nervous system development // post-embryonic development // pigmentation	GO:0005777	peroxisome	GO:0003674	molecular_function	---	---
10515735	0.72111	0.00128306	Szt2	NM_198170	RefSeq	Mus musculus seizure threshold 2 (Szt2), mRNA.	FALSE	GO:0007417 // GO:0009791 // GO:0043473	central nervous system development // post-embryonic development // pigmentation	GO:0005777	peroxisome	GO:0003674	molecular_function	---	---
10517421	0.630136	9.44376e-05	Pnrc2	NM_026383	RefSeq	Mus musculus proline-rich nuclear receptor coactivator 2 (Pnrc2), mRNA.	FALSE	GO:0000184 // GO:0006351 // GO:0006355	nuclear-transcribed mRNA catabolic process, nonsense-mediated decay // transcription, DNA-dependent // regulation of transcription, DNA-dependent	GO:0000932 // GO:0005634 // GO:0005737	cytoplasmic mRNA processing body // nucleus // cytoplasm	---	---	---	---
10519488	0.694749	0.000861592	Tubb4b	NM_146116	RefSeq	Mus musculus tubulin, beta 4B class IVB (Tubb4b), mRNA.	FALSE	GO:0006184 // GO:0007017 // GO:0007018 // GO:0051258	GTP catabolic process // microtubule-based process // microtubule-based movement // protein polymerization	GO:0005737 // GO:0005856 // GO:0005874 // GO:0043234 // GO:0045298	cytoplasm // cytoskeleton // microtubule // protein complex // tubulin complex	GO:0000166 // GO:0003924 // GO:0005198 // GO:0005525	nucleotide binding // GTPase activity // structural molecule activity // GTP binding	---	---
10521892	2.05204	0.00106114	Slc34a2	NM_011402	RefSeq	Mus musculus solute carrier family 34 (sodium phosphate), member 2 (Slc34a2), mRNA.	FALSE	GO:0001701 // GO:0006810 // GO:0006811 // GO:0006814 // GO:0006817 // GO:0006817 // GO:0006817 // GO:0030643 // GO:0035435 // GO:0044341	in utero embryonic development // transport // ion transport // sodium ion transport // phosphate ion transport // phosphate ion transport // phosphate ion transport // cellular phosphate ion homeostasis // phosphate ion transmembrane transport // sodium-dependent phosphate transport	GO:0005903 // GO:0016020 // GO:0016021 // GO:0016324 // GO:0016324 // GO:0031526	brush border // membrane // integral to membrane // apical plasma membrane // apical plasma membrane // brush border membrane	GO:0005436 // GO:0015293 // GO:0015321 // GO:0015321 // GO:0031402 // GO:0042301	sodium:phosphate symporter activity // symporter activity // sodium-dependent phosphate transmembrane transporter activity // sodium-dependent phosphate transmembrane transporter activity // sodium ion binding // phosphate ion binding	---	---
10523128	2.22018	0.00419856	Ppbp	NM_023785	RefSeq	Mus musculus pro-platelet basic protein (Ppbp), mRNA.	FALSE	GO:0008150	biological_process	GO:0005576	extracellular region	GO:0003674	molecular_function	---	---
10523281	0.714204	0.00108881	2016-09-11	NM_001009818	RefSeq	Mus musculus septin 11 (Sept11), mRNA.	FALSE	GO:0007049 // GO:0051291 // GO:0051301	cell cycle // protein heterooligomerization // cell division	GO:0001725 // GO:0005737 // GO:0005856 // GO:0030054 // GO:0031105 // GO:0042995 // GO:0045202	stress fiber // cytoplasm // cytoskeleton // cell junction // septin complex // cell projection // synapse	GO:0000166 // GO:0003674 // GO:0005525	nucleotide binding // molecular_function // GTP binding	---	---
10523297	1.09755	6.04741e-05	Ccng2	ENSMUST00000031331	ENSEMBL	cdna:known chromosome:NCBIM37:5:93696283:93705257:1 gene:ENSMUSG00000029385 gene_biotype:protein_coding transcript_biotype:protein_coding	FALSE	GO:0007049 // GO:0007067 // GO:0051301 // GO:0051726	cell cycle // mitosis // cell division // regulation of cell cycle	GO:0005634 // GO:0005737	nucleus // cytoplasm	---	---	---	---
10523579	0.887723	8.97428e-05	Arhgap24	NM_029270	RefSeq	Mus musculus Rho GTPase activating protein 24 (Arhgap24), transcript variant 1, mRNA.	FALSE	GO:0001525 // GO:0007165 // GO:0007275 // GO:0030154	angiogenesis // signal transduction // multicellular organismal development // cell differentiation	GO:0005622 // GO:0005737 // GO:0005856 // GO:0005886 // GO:0030054 // GO:0042995	intracellular // cytoplasm // cytoskeleton // plasma membrane // cell junction // cell projection	GO:0003674 // GO:0005096 // GO:0005543	molecular_function // GTPase activator activity // phospholipid binding	---	---
10530733	1.22603	6.05887e-05	Clock	NM_007715	RefSeq	Mus musculus circadian locomotor output cycles kaput (Clock), mRNA.	FALSE	GO:0000077 // GO:0006351 // GO:0006355 // GO:0006355 // GO:0006974 // GO:0007165 // GO:0007623 // GO:0007623 // GO:0032922 // GO:0045944 // GO:0045944 // GO:0045944 // GO:0045944 // GO:0048511 // GO:0071479	DNA damage checkpoint // transcription, DNA-dependent // regulation of transcription, DNA-dependent // regulation of transcription, DNA-dependent // response to DNA damage stimulus // signal transduction // circadian rhythm // circadian rhythm // circadian regulation of gene expression // positive regulation of transcription from RNA polymerase II promoter // positive regulation of transcription …	GO:0005634 // GO:0005634 // GO:0005667 // GO:0005667 // GO:0005694 // GO:0005737 // GO:0043231	nucleus // nucleus // transcription factor complex // transcription factor complex // chromosome // cytoplasm // intracellular membrane-bounded organelle	GO:0000978 // GO:0000982 // GO:0001077 // GO:0001190 // GO:0003677 // GO:0003700 // GO:0003700 // GO:0004402 // GO:0004871 // GO:0005515 // GO:0008134 // GO:0016740 // GO:0016746 // GO:0070888	RNA polymerase II core promoter proximal region sequence-specific DNA binding // RNA polymerase II core promoter proximal region sequence-specific DNA binding transcription factor activity // RNA polymerase II core promoter proximal region sequence-specific DNA binding transcription factor activity involved in positive regulation of transcription // RNA polymerase II transcription factor binding …	GenMAPP	Circadian_Exercise
10531994	1.54674	0.000650903	Gbp6	NM_194336	RefSeq	Mus musculus guanylate binding protein 6 (Gbp6), mRNA.	FALSE	GO:0035458 // GO:0042832 // GO:0050830 // GO:0050830 // GO:0051856 // GO:0071222 // GO:0071346	cellular response to interferon-beta // defense response to protozoan // defense response to Gram-positive bacterium // defense response to Gram-positive bacterium // adhesion to symbiont // cellular response to lipopolysaccharide // cellular response to interferon-gamma	GO:0020005 // GO:0031410	symbiont-containing vacuole membrane // cytoplasmic vesicle	GO:0003674	molecular_function	---	---
10535759	0.724753	0.00204215	Lnx2	NM_080795	RefSeq	Mus musculus ligand of numb-protein X 2 (Lnx2), mRNA.	FALSE	GO:0051260	protein homooligomerization	GO:0005575	cellular_component	GO:0005515 // GO:0008270 // GO:0030165 // GO:0046872	protein binding // zinc ion binding // PDZ domain binding // metal ion binding	---	---
10535898	0.665115	0.00110523	Gm8615	NR_028061	RefSeq	Mus musculus predicted pseudogene 8615 (Gm8615), non-coding RNA.	FALSE	---	---	---	---	---	---	---	---
10537062	1.04084	0.00392546	---	---	---	---	---	---	---	---	---	---	---	---	---
10539156	1.11084	0.000302145	Gm15401	NR_040421	RefSeq	Mus musculus predicted gene 15401 (Gm15401), transcript variant 1, non-coding RNA.	FALSE	GO:0008150	biological_process	GO:0005575	cellular_component	GO:0003674	molecular_function	---	---
10541771	0.629349	0.000932474	Ing4	NM_133345	RefSeq	Mus musculus inhibitor of growth family, member 4 (Ing4), mRNA.	FALSE	GO:0006260 // GO:0006473 // GO:0006915 // GO:0006978 // GO:0007049 // GO:0007050 // GO:0008285 // GO:0016568 // GO:0043065 // GO:0043966 // GO:0043981 // GO:0043982 // GO:0043983 // GO:0045892 // GO:0045926	DNA replication // protein acetylation // apoptotic process // DNA damage response, signal transduction by p53 class mediator resulting in transcription of p21 class mediator // cell cycle // cell cycle arrest // negative regulation of cell proliferation // chromatin modification // positive regulation of apoptotic process // histone H3 acetylation // histone H4-K5 acetylation // histone H4-K8 ac…	GO:0000123 // GO:0005634	histone acetyltransferase complex // nucleus	GO:0003713 // GO:0008270 // GO:0035064 // GO:0046872	transcription coactivator activity // zinc ion binding // methylated histone residue binding // metal ion binding	---	---
10542953	0.598631	0.00176013	Tfpi2	NM_009364	RefSeq	Mus musculus tissue factor pathway inhibitor 2 (Tfpi2), mRNA.	FALSE	GO:0007596 // GO:0007599 // GO:0010466	blood coagulation // hemostasis // negative regulation of peptidase activity	GO:0005576	extracellular region	GO:0004867 // GO:0030414	serine-type endopeptidase inhibitor activity // peptidase inhibitor activity	---	---
10542959	0.711501	0.00373214	Bet1	ENSMUST00000049166	ENSEMBL	cdna:known chromosome:NCBIM37:6:4026899:4036972:-1 gene:ENSMUSG00000032757 gene_biotype:protein_coding transcript_biotype:protein_coding	FALSE	GO:0006810 // GO:0006888 // GO:0015031 // GO:0016192 // GO:0048280	transport // ER to Golgi vesicle-mediated transport // protein transport // vesicle-mediated transport // vesicle fusion with Golgi apparatus	GO:0000139 // GO:0005783 // GO:0005794 // GO:0005801 // GO:0016020 // GO:0016021 // GO:0031201 // GO:0031985	Golgi membrane // endoplasmic reticulum // Golgi apparatus // cis-Golgi network // membrane // integral to membrane // SNARE complex // Golgi cisterna	GO:0003674	molecular_function	---	---
10546031	0.627751	0.00142296	Aplf	NM_024251	RefSeq	Mus musculus aprataxin and PNKP like factor (Aplf), transcript variant 2, mRNA.	FALSE	GO:0000012 // GO:0006281 // GO:0006302 // GO:0006974	single strand break repair // DNA repair // double-strand break repair // response to DNA damage stimulus	GO:0005634 // GO:0005737	nucleus // cytoplasm	GO:0000166 // GO:0003906 // GO:0004520 // GO:0008408 // GO:0016829 // GO:0046872	nucleotide binding // DNA-(apurinic or apyrimidinic site) lyase activity // endodeoxyribonuclease activity // 3'-5' exonuclease activity // lyase activity // metal ion binding	---	---
10550956	0.793901	0.00253827	Ethe1	NM_023154	RefSeq	Mus musculus ethylmalonic encephalopathy 1 (Ethe1), nuclear gene encoding mitochondrial protein, mRNA.	FALSE	---	---	GO:0005634 // GO:0005737 // GO:0005739 // GO:0005739	nucleus // cytoplasm // mitochondrion // mitochondrion	GO:0016787 // GO:0046872	hydrolase activity // metal ion binding	---	---
10556381	0.836548	2.03843e-05	Mical2	NM_001193305	RefSeq	Mus musculus microtubule associated monoxygenase, calponin and LIM domain containing 2 (Mical2), transcript variant A, mRNA.	FALSE	GO:0008150 // GO:0008152 // GO:0055114	biological_process // metabolic process // oxidation-reduction process	GO:0005575 // GO:0005737 // GO:0005856	cellular_component // cytoplasm // cytoskeleton	GO:0003674 // GO:0003779 // GO:0004497 // GO:0008270 // GO:0016491 // GO:0046872	molecular_function // actin binding // monooxygenase activity // zinc ion binding // oxidoreductase activity // metal ion binding	---	---
10556463	3.36825	1.20042e-07	Arntl	NM_007489	RefSeq	Mus musculus aryl hydrocarbon receptor nuclear translocator-like (Arntl), transcript variant 1, mRNA.	FALSE	GO:0000060 // GO:0006351 // GO:0006355 // GO:0006355 // GO:0007165 // GO:0007623 // GO:0007623 // GO:0042176 // GO:0045944 // GO:0045944 // GO:0045944 // GO:0045944	protein import into nucleus, translocation // transcription, DNA-dependent // regulation of transcription, DNA-dependent // regulation of transcription, DNA-dependent // signal transduction // circadian rhythm // circadian rhythm // regulation of protein catabolic process // positive regulation of transcription from RNA polymerase II promoter // positive regulation of transcription from RNA polym…	GO:0005634 // GO:0005667 // GO:0005667 // GO:0005737	nucleus // transcription factor complex // transcription factor complex // cytoplasm	GO:0000982 // GO:0001077 // GO:0001190 // GO:0003677 // GO:0003677 // GO:0003700 // GO:0003700 // GO:0004871 // GO:0004872 // GO:0005515 // GO:0008134 // GO:0017162 // GO:0043425 // GO:0046982 // GO:0051879	RNA polymerase II core promoter proximal region sequence-specific DNA binding transcription factor activity // RNA polymerase II core promoter proximal region sequence-specific DNA binding transcription factor activity involved in positive regulation of transcription // RNA polymerase II transcription factor binding transcription factor activity involved in positive regulation of transcription //…	---	---
10557300	0.951239	0.00278318	Aqp8	NM_007474	RefSeq	Mus musculus aquaporin 8 (Aqp8), transcript variant 1, mRNA.	FALSE	GO:0006810 // GO:0006833 // GO:0006833 // GO:0006833 // GO:0015722 // GO:0055085	transport // water transport // water transport // water transport // canalicular bile acid transport // transmembrane transport	GO:0005792 // GO:0005886 // GO:0005887 // GO:0016020 // GO:0016021 // GO:0045177 // GO:0046691	microsome // plasma membrane // integral to plasma membrane // membrane // integral to membrane // apical part of cell // intracellular canaliculus	GO:0005215 // GO:0015250 // GO:0015250	transporter activity // water channel activity // water channel activity	---	---
10560015	0.673737	0.000261609	Rnf141	NM_025999	RefSeq	Mus musculus ring finger protein 141 (Rnf141), mRNA.	FALSE	GO:0006355	regulation of transcription, DNA-dependent	GO:0005575	cellular_component	GO:0003677 // GO:0008270 // GO:0046872	DNA binding // zinc ion binding // metal ion binding	---	---
10563770	0.928583	0.00138229	Csrp3	NM_013808	RefSeq	Mus musculus cysteine and glycine-rich protein 3 (Csrp3), transcript variant 1, mRNA.	FALSE	GO:0002026 // GO:0006874 // GO:0007275 // GO:0007517 // GO:0030154 // GO:0048738	regulation of the force of heart contraction // cellular calcium ion homeostasis // multicellular organismal development // muscle organ development // cell differentiation // cardiac muscle tissue development	GO:0005634 // GO:0005737 // GO:0005856 // GO:0030018	nucleus // cytoplasm // cytoskeleton // Z disc	GO:0005515 // GO:0008270 // GO:0046872	protein binding // zinc ion binding // metal ion binding	---	---
10563780	1.40422	0.00259737	E2f8	NM_001013368	RefSeq	Mus musculus E2F transcription factor 8 (E2f8), mRNA.	FALSE	GO:0006351 // GO:0006355 // GO:0007049 // GO:0008283	transcription, DNA-dependent // regulation of transcription, DNA-dependent // cell cycle // cell proliferation	GO:0005634 // GO:0005667	nucleus // transcription factor complex	GO:0003677 // GO:0003700 // GO:0042802 // GO:0042803	DNA binding // sequence-specific DNA binding transcription factor activity // identical protein binding // protein homodimerization activity	---	---
10565456	0.586251	0.00406446	Prss23	NM_029614	RefSeq	Mus musculus protease, serine, 23 (Prss23), mRNA.	FALSE	GO:0006508	proteolysis	GO:0005576 // GO:0005634	extracellular region // nucleus	GO:0003824 // GO:0004252 // GO:0008233 // GO:0008236 // GO:0016787	catalytic activity // serine-type endopeptidase activity // peptidase activity // serine-type peptidase activity // hydrolase activity	---	---
10566767	1.53551	1.13591e-06	St5	NM_001001326	RefSeq	Mus musculus suppression of tumorigenicity 5 (St5), transcript variant 1, mRNA.	FALSE	GO:0070374	positive regulation of ERK1 and ERK2 cascade	GO:0005575	cellular_component	GO:0003674	molecular_function	---	---
10566926	0.623107	0.000987669	Rnf141	ENSMUST00000177236	ENSEMBL	cdna:known chromosome:NCBIM37:7:117957045:117987971:-1 gene:ENSMUSG00000030788 gene_biotype:protein_coding transcript_biotype:protein_coding	FALSE	GO:0006355	regulation of transcription, DNA-dependent	GO:0005575	cellular_component	GO:0003677 // GO:0008270 // GO:0046872	DNA binding // zinc ion binding // metal ion binding	---	---
10582466	1.32973	0.00126212	Sult5a1	NM_020564	RefSeq	Mus musculus sulfotransferase family 5A, member 1 (Sult5a1), mRNA.	FALSE	GO:0008150	biological_process	GO:0005575	cellular_component	GO:0003674 // GO:0016740	molecular_function // transferase activity	---	---
10582694	0.957581	0.00476166	Fam89a	NM_001081120	RefSeq	Mus musculus family with sequence similarity 89, member A (Fam89a), mRNA.	FALSE	GO:0008150	biological_process	GO:0005575	cellular_component	GO:0003674	molecular_function	---	---
10582958	0.889761	0.00252946	Gucy1a2	NM_001033322	RefSeq	Mus musculus guanylate cyclase 1, soluble, alpha 2 (Gucy1a2), mRNA.	FALSE	GO:0006182 // GO:0030828	cGMP biosynthetic process // positive regulation of cGMP biosynthetic process	---	---	GO:0000166 // GO:0004383 // GO:0016829	nucleotide binding // guanylate cyclase activity // lyase activity	---	---
10584124	0.743766	0.00473108	Arhgap32	NM_001195632	RefSeq	Mus musculus Rho GTPase activating protein 32 (Arhgap32), transcript variant 1, mRNA.	FALSE	GO:0007154 // GO:0007165 // GO:0007266	cell communication // signal transduction // Rho protein signal transduction	GO:0005622 // GO:0005737 // GO:0005768 // GO:0005783 // GO:0005794 // GO:0005886 // GO:0005938 // GO:0015629 // GO:0016020 // GO:0030054 // GO:0042995 // GO:0045202 // GO:0045211	intracellular // cytoplasm // endosome // endoplasmic reticulum // Golgi apparatus // plasma membrane // cell cortex // actin cytoskeleton // membrane // cell junction // cell projection // synapse // postsynaptic membrane	GO:0005096 // GO:0035091	GTPase activator activity // phosphatidylinositol binding	---	---
10584271	0.840829	0.000391718	Tmem218	NM_025464	RefSeq	Mus musculus transmembrane protein 218 (Tmem218), mRNA.	FALSE	GO:0008150	biological_process	GO:0005575 // GO:0016020 // GO:0016021	cellular_component // membrane // integral to membrane	GO:0003674	molecular_function	---	---
10586368	1.41926	9.91444e-07	Clpx	NM_011802	RefSeq	Mus musculus caseinolytic peptidase X (E.coli) (Clpx), transcript variant 1, mRNA.	FALSE	GO:0006200 // GO:0006457 // GO:0010952 // GO:0051603	ATP catabolic process // protein folding // positive regulation of peptidase activity // proteolysis involved in cellular protein catabolic process	GO:0005634 // GO:0005739 // GO:0005739 // GO:0005743 // GO:0009841 // GO:0042645	nucleus // mitochondrion // mitochondrion // mitochondrial inner membrane // mitochondrial endopeptidase Clp complex // mitochondrial nucleoid	GO:0000166 // GO:0005515 // GO:0005524 // GO:0016504 // GO:0016887 // GO:0017111 // GO:0046872 // GO:0051082	nucleotide binding // protein binding // ATP binding // peptidase activator activity // ATPase activity // nucleoside-triphosphatase activity // metal ion binding // unfolded protein binding	---	---
10587211	0.86326	0.00112269	Leo1	NM_001039522	RefSeq	Mus musculus Leo1, Paf1/RNA polymerase II complex component, homolog (S. cerevisiae) (Leo1), mRNA.	FALSE	GO:0001711 // GO:0006351 // GO:0006355 // GO:0006378 // GO:0010390 // GO:0016055 // GO:0019827 // GO:0019827 // GO:0031442 // GO:0032968 // GO:0033523 // GO:0045638 // GO:0045944	endodermal cell fate commitment // transcription, DNA-dependent // regulation of transcription, DNA-dependent // mRNA polyadenylation // histone monoubiquitination // Wnt receptor signaling pathway // stem cell maintenance // stem cell maintenance // positive regulation of mRNA 3'-end processing // positive regulation of transcription elongation from RNA polymerase II promoter // histone H2B ubiq…	GO:0005634 // GO:0005730 // GO:0016593	nucleus // nucleolus // Cdc73/Paf1 complex	---	---	---	---
10588883	0.704488	0.000146422	Amt	NM_001013814	RefSeq	Mus musculus aminomethyltransferase (Amt), nuclear gene encoding mitochondrial protein, mRNA.	FALSE	GO:0006546 // GO:0032259	glycine catabolic process // methylation	GO:0005737 // GO:0005739	cytoplasm // mitochondrion	GO:0004047 // GO:0008168 // GO:0008483 // GO:0016740	aminomethyltransferase activity // methyltransferase activity // transaminase activity // transferase activity	---	---
10590438	2.13569	8.38342e-05	Fam198a	ENSMUST00000098269	ENSEMBL	cdna:known chromosome:NCBIM37:9:121861852:121887803:1 gene:ENSMUSG00000038233 gene_biotype:protein_coding transcript_biotype:protein_coding	FALSE	GO:0008150	biological_process	GO:0005575 // GO:0005576	cellular_component // extracellular region	GO:0003674	molecular_function	---	---
10590654	0.653184	0.00251661	Aasdhppt	NM_026276	RefSeq	Mus musculus aminoadipate-semialdehyde dehydrogenase-phosphopantetheinyl transferase (Aasdhppt), mRNA.	FALSE	GO:0009059	macromolecule biosynthetic process	GO:0005737	cytoplasm	GO:0000287 // GO:0008897 // GO:0016740 // GO:0046872	magnesium ion binding // holo-[acyl-carrier-protein] synthase activity // transferase activity // metal ion binding	---	---
10590968	0.609057	0.000854598	Ankrd49	NM_019683	RefSeq	Mus musculus ankyrin repeat domain 49 (Ankrd49), mRNA.	FALSE	GO:0045893	positive regulation of transcription, DNA-dependent	GO:0005575	cellular_component	GO:0003674	molecular_function	---	---
10591241	0.740744	0.00278489	Zfp426	NM_146221	RefSeq	Mus musculus zinc finger protein 426 (Zfp426), transcript variant 1, mRNA.	FALSE	GO:0006351 // GO:0006355 // GO:0008150	transcription, DNA-dependent // regulation of transcription, DNA-dependent // biological_process	GO:0005622 // GO:0005634	intracellular // nucleus	GO:0003676 // GO:0003677 // GO:0008270 // GO:0046872	nucleic acid binding // DNA binding // zinc ion binding // metal ion binding	---	---
10592160	0.631531	0.00464295	---	ENSMUST00000093869	ENSEMBL	cdna:pseudogene chromosome:NCBIM37:9:35381221:35382248:-1 gene:ENSMUSG00000086984 gene_biotype:pseudogene transcript_biotype:transcribed_processed_pseudogene	FALSE	---	---	---	---	---	---	---	---
10597136	0.593625	0.00338658	Ptpn23	NM_001081043	RefSeq	Mus musculus protein tyrosine phosphatase, non-receptor type 23 (Ptpn23), mRNA.	FALSE	GO:0006470 // GO:0016311 // GO:0030030 // GO:0060271	protein dephosphorylation // dephosphorylation // cell projection organization // cilium morphogenesis	GO:0005634 // GO:0005737 // GO:0005768 // GO:0005856 // GO:0005929 // GO:0005932 // GO:0031410 // GO:0042995	nucleus // cytoplasm // endosome // cytoskeleton // cilium // microtubule basal body // cytoplasmic vesicle // cell projection	GO:0004721 // GO:0004725 // GO:0016787 // GO:0016791	phosphoprotein phosphatase activity // protein tyrosine phosphatase activity // hydrolase activity // phosphatase activity	---	---
10597258	1.49949	4.48311e-06	Tmie	NM_146260	RefSeq	Mus musculus transmembrane inner ear (Tmie), mRNA.	FALSE	GO:0007605 // GO:0042472	sensory perception of sound // inner ear morphogenesis	GO:0016020 // GO:0016021	membrane // integral to membrane	---	---	---	---
10597875	0.940527	0.00402163	Cyp8b1	NM_010012	RefSeq	Mus musculus cytochrome P450, family 8, subfamily b, polypeptide 1 (Cyp8b1), mRNA.	FALSE	GO:0055114	oxidation-reduction process	GO:0005783 // GO:0016020 // GO:0016021	endoplasmic reticulum // membrane // integral to membrane	GO:0004497 // GO:0005506 // GO:0008397 // GO:0009055 // GO:0016491 // GO:0016705 // GO:0020037 // GO:0033778 // GO:0046872	monooxygenase activity // iron ion binding // sterol 12-alpha-hydroxylase activity // electron carrier activity // oxidoreductase activity // oxidoreductase activity, acting on paired donors, with incorporation or reduction of molecular oxygen // heme binding // 7alpha-hydroxycholest-4-en-3-one 12alpha-hydroxylase activity // metal ion binding	---	---
10600602	1.21227	0.000873805	---	ENSMUST00000082847	ENSEMBL	ncrna:snRNA chromosome:NCBIM37:X:79433017:79433120:1 gene:ENSMUSG00000064781 gene_biotype:snRNA transcript_biotype:snRNA	FALSE	---	---	---	---	---	---	---	---
10608634	1.17433	0.000319731	Raet1d // Raet1b // Raet1a	ENSMUST00000095795	ENSEMBL	cdna:known chromosome:NCBIM37:10:22081700:22093943:1 gene:ENSMUSG00000078452 gene_biotype:protein_coding transcript_biotype:protein_coding	FALSE	GO:0006955 // GO:0019882 // GO:0042742 // GO:0071222 // GO:0071360 // GO:0002839 // GO:0032729 // GO:0032816 // GO:0042271 // GO:0043032 // GO:0045429	immune response // antigen processing and presentation // defense response to bacterium // cellular response to lipopolysaccharide // cellular response to exogenous dsRNA // positive regulation of immune response to tumor cell // positive regulation of interferon-gamma production // positive regulation of natural killer cell activation // susceptibility to natural killer cell mediated cytotoxicit…	GO:0005886 // GO:0016020 // GO:0031225 // GO:0046658 // GO:0009897 // GO:0031362	plasma membrane // membrane // anchored to membrane // anchored to plasma membrane // external side of plasma membrane // anchored to external side of plasma membrane	GO:0046703 // GO:0005515	natural killer cell lectin-like receptor binding // protein binding	---	---
10608648	1.17433	0.000319731	Raet1d // Raet1b // Raet1a	ENSMUST00000130977	ENSEMBL	cdna:known chromosome:NCBIM37:10:22082077:22093945:1 gene:ENSMUSG00000078452 gene_biotype:protein_coding transcript_biotype:protein_coding	FALSE	GO:0006955 // GO:0019882 // GO:0042742 // GO:0071222 // GO:0071360 // GO:0002839 // GO:0032729 // GO:0032816 // GO:0042271 // GO:0043032 // GO:0045429	immune response // antigen processing and presentation // defense response to bacterium // cellular response to lipopolysaccharide // cellular response to exogenous dsRNA // positive regulation of immune response to tumor cell // positive regulation of interferon-gamma production // positive regulation of natural killer cell activation // susceptibility to natural killer cell mediated cytotoxicit…	GO:0005886 // GO:0016020 // GO:0031225 // GO:0046658 // GO:0009897 // GO:0031362	plasma membrane // membrane // anchored to membrane // anchored to plasma membrane // external side of plasma membrane // anchored to external side of plasma membrane	GO:0046703 // GO:0005515	natural killer cell lectin-like receptor binding // protein binding	---	---
10608661	1.19263	0.000346491	Raet1e // Raet1c	ENSMUST00000065527	ENSEMBL	cdna:known chromosome:NCBIM37:10:21893327:21903720:1 gene:ENSMUSG00000053219 gene_biotype:protein_coding transcript_biotype:protein_coding	FALSE	GO:0042742 // GO:0071222 // GO:0071360 // GO:0008150	defense response to bacterium // cellular response to lipopolysaccharide // cellular response to exogenous dsRNA // biological_process	GO:0009897	external side of plasma membrane	GO:0005515	protein binding	---	---

## Sheet: up.SAvsWT
Table S2: Lists of genes differentially expressed between wildtype (WT), Rassf1a-/- Sav1+/+ (RA), Rassf1a+/+ Sav1+/- (SA) and Rassf1a-/- Sav1+/- (RA_SA) mouse livers
ID	SA.vs.WT.FC	SA.vs.WT.p	Gene.Symbol	mRNA.Accession	mRNA..Source	mRna...Description	mRNA...xhyb	GO.Biological.Process.ID	GO.Biological.Process.Term	GO.Cellular.Component.ID	GO.Cellular.Component.Term	GO.Molecular.Function.ID	GO.Molecular.Function.Term	Pathway.Source	Pathway.Name
10338406	2.77954	0.000974455	---	---	---	---	---	---	---	---	---	---	---	---	---
10338638	1.06405	0.00266991	---	---	---	---	---	---	---	---	---	---	---	---	---
10338740	1.13865	0.00314458	---	---	---	---	---	---	---	---	---	---	---	---	---
10338902	2.18715	0.00325269	---	---	---	---	---	---	---	---	---	---	---	---	---
10339382	0.592522	0.00151429	---	---	---	---	---	---	---	---	---	---	---	---	---
10339622	2.86187	0.00040766	---	---	---	---	---	---	---	---	---	---	---	---	---
10340331	0.79564	0.00116726	---	---	---	---	---	---	---	---	---	---	---	---	---
10340421	1.21627	0.00290827	---	---	---	---	---	---	---	---	---	---	---	---	---
10340525	2.60172	0.00421503	---	---	---	---	---	---	---	---	---	---	---	---	---
10340899	0.981687	0.00227667	---	---	---	---	---	---	---	---	---	---	---	---	---
10340909	4.14673	0.000217423	---	---	---	---	---	---	---	---	---	---	---	---	---
10341167	1.06662	0.00318559	---	---	---	---	---	---	---	---	---	---	---	---	---
10342158	3.46138	0.00190955	---	---	---	---	---	---	---	---	---	---	---	---	---
10342181	0.796584	0.000652338	---	---	---	---	---	---	---	---	---	---	---	---	---
10342272	2.51335	0.00218695	---	---	---	---	---	---	---	---	---	---	---	---	---
10342337	1.57223	4.10163e-05	---	---	---	---	---	---	---	---	---	---	---	---	---
10342589	1.86445	0.00140044	---	---	---	---	---	---	---	---	---	---	---	---	---
10342760	0.689003	0.00438256	---	---	---	---	---	---	---	---	---	---	---	---	---
10343597	1.61727	0.001343	---	---	---	---	---	---	---	---	---	---	---	---	---
10344054	0.662375	0.00412721	---	---	---	---	---	---	---	---	---	---	---	---	---
10344055	1.10848	0.00199136	---	---	---	---	---	---	---	---	---	---	---	---	---
10344060	1.23816	0.0043917	---	---	---	---	---	---	---	---	---	---	---	---	---
10344063	2.06316	0.00245998	---	---	---	---	---	---	---	---	---	---	---	---	---
10344255	1.78371	0.0042402	---	---	---	---	---	---	---	---	---	---	---	---	---
10344418	1.8162	0.00276447	---	---	---	---	---	---	---	---	---	---	---	---	---
10344966	0.730098	0.000444115	Ly96	NM_016923	RefSeq	Mus musculus lymphocyte antigen 96 (Ly96), transcript variant 1, mRNA.	FALSE	GO:0006954 // GO:0031663 // GO:0032496 // GO:0032497 // GO:0045087	inflammatory response // lipopolysaccharide-mediated signaling pathway // response to lipopolysaccharide // detection of lipopolysaccharide // innate immune response	GO:0005576 // GO:0046696	extracellular region // lipopolysaccharide receptor complex	GO:0001875 // GO:0005515	lipopolysaccharide receptor activity // protein binding	---	---
10345777	0.702478	0.00123543	Il1rl2	NM_133193	RefSeq	Mus musculus interleukin 1 receptor-like 2 (Il1rl2), mRNA.	FALSE	GO:0007165 // GO:0019221 // GO:0045087	signal transduction // cytokine-mediated signaling pathway // innate immune response	GO:0005575 // GO:0005622 // GO:0016020 // GO:0016021 // GO:0031224	cellular_component // intracellular // membrane // integral to membrane // intrinsic to membrane	GO:0004872 // GO:0004888 // GO:0004896 // GO:0004908 // GO:0004909	receptor activity // transmembrane signaling receptor activity // cytokine receptor activity // interleukin-1 receptor activity // interleukin-1, Type I, activating receptor activity	---	---
10356329	2.41766	0.00164404	---	---	---	---	---	---	---	---	---	---	---	---	---
10360370	0.709937	0.000691339	BC094916	BC094916	GenBank	Mus musculus cDNA sequence BC094916, mRNA (cDNA clone MGC:107449 IMAGE:30074914), complete cds.	FALSE	GO:0008150	biological_process	GO:0005575 // GO:0005634	cellular_component // nucleus	GO:0003674	molecular_function	---	---
10390691	0.757533	0.00182708	Nr1d1	NM_145434	RefSeq	Mus musculus nuclear receptor subfamily 1, group D, member 1 (Nr1d1), mRNA.	FALSE	GO:0000122 // GO:0006351 // GO:0006355 // GO:0007623 // GO:0010871 // GO:0034144 // GO:0043401 // GO:0071222	negative regulation of transcription from RNA polymerase II promoter // transcription, DNA-dependent // regulation of transcription, DNA-dependent // circadian rhythm // negative regulation of receptor biosynthetic process // negative regulation of toll-like receptor 4 signaling pathway // steroid hormone mediated signaling pathway // cellular response to lipopolysaccharide	GO:0000790 // GO:0005634	nuclear chromatin // nucleus	GO:0003677 // GO:0003700 // GO:0003707 // GO:0004872 // GO:0008270 // GO:0043565 // GO:0044212 // GO:0046872	DNA binding // sequence-specific DNA binding transcription factor activity // steroid hormone receptor activity // receptor activity // zinc ion binding // sequence-specific DNA binding // transcription regulatory region DNA binding // metal ion binding	---	---
10402347	1.27436	0.000331488	Ifi27l2a	NM_029803	RefSeq	Mus musculus interferon, alpha-inducible protein 27 like 2A (Ifi27l2a), mRNA.	FALSE	GO:0007568 // GO:0009615	aging // response to virus	GO:0005575 // GO:0016020 // GO:0016021	cellular_component // membrane // integral to membrane	GO:0003674	molecular_function	---	---
10441003	0.628055	0.00372752	Runx1	NM_001111023	RefSeq	Mus musculus runt related transcription factor 1 (Runx1), transcript variant 3, mRNA.	FALSE	GO:0001501 // GO:0001701 // GO:0001889 // GO:0002318 // GO:0006351 // GO:0006355 // GO:0007417 // GO:0009966 // GO:0030097 // GO:0030097 // GO:0030099 // GO:0030182 // GO:0030853 // GO:0030854 // GO:0031069 // GO:0032526 // GO:0035162 // GO:0045766 // GO:0045893 // GO:0045944 // GO:0045944 // GO:0048266 // GO:0048666 // GO:0060216 // GO:0071336 // GO:2000872	skeletal system development // in utero embryonic development // liver development // myeloid progenitor cell differentiation // transcription, DNA-dependent // regulation of transcription, DNA-dependent // central nervous system development // regulation of signal transduction // hemopoiesis // hemopoiesis // myeloid cell differentiation // neuron differentiation // negative regulation of granul…	GO:0005604 // GO:0005634 // GO:0005634 // GO:0043231	basement membrane // nucleus // nucleus // intracellular membrane-bounded organelle	GO:0000975 // GO:0003677 // GO:0003677 // GO:0003700 // GO:0003700 // GO:0005509 // GO:0005515 // GO:0005524 // GO:0008134 // GO:0042803 // GO:0046982 // GO:0070491	regulatory region DNA binding // DNA binding // DNA binding // sequence-specific DNA binding transcription factor activity // sequence-specific DNA binding transcription factor activity // calcium ion binding // protein binding // ATP binding // transcription factor binding // protein homodimerization activity // protein heterodimerization activity // repressing transcription factor binding	---	---
10462621	0.869244	0.00158497	I830012O16Rik	NM_001005858	RefSeq	Mus musculus RIKEN cDNA I830012O16 gene (I830012O16Rik), mRNA.	FALSE	GO:0008150	biological_process	GO:0005575	cellular_component	GO:0003674	molecular_function	---	---
10474181	-0.593427	0.00264216	Abtb2	NM_178890	RefSeq	Mus musculus ankyrin repeat and BTB (POZ) domain containing 2 (Abtb2), mRNA.	FALSE	GO:0008150	biological_process	GO:0005575	cellular_component	GO:0003674 // GO:0003677	molecular_function // DNA binding	---	---
10489041	0.606402	0.000319695	Pdcd10	NM_019745	RefSeq	Mus musculus programmed cell death 10 (Pdcd10), mRNA.	FALSE	GO:0001525 // GO:0006915 // GO:0008284 // GO:0043066 // GO:0043406	angiogenesis // apoptotic process // positive regulation of cell proliferation // negative regulation of apoptotic process // positive regulation of MAP kinase activity	GO:0005737 // GO:0005794 // GO:0005829 // GO:0005886 // GO:0016020	cytoplasm // Golgi apparatus // cytosol // plasma membrane // membrane	GO:0042803 // GO:0047485	protein homodimerization activity // protein N-terminus binding	---	---
10497761	1.20826	0.00101558	Gm6639	NR_040748	RefSeq	Mus musculus predicted gene 6639 (Gm6639), non-coding RNA.	FALSE	GO:0008150	biological_process	GO:0005575	cellular_component	GO:0003674	molecular_function	---	---
10504137	0.610709	0.00304164	4933409K07Rik	NR_033123	RefSeq	Mus musculus RIKEN cDNA 4933409K07 gene (4933409K07Rik), non-coding RNA.	FALSE	---	---	---	---	---	---	---	---
10504201	0.610709	0.00304164	4933409K07Rik	NR_033123	RefSeq	Mus musculus RIKEN cDNA 4933409K07 gene (4933409K07Rik), non-coding RNA.	FALSE	---	---	---	---	---	---	---	---
10505268	1.16558	0.000793398	---	ENSMUST00000098035	ENSEMBL	cdna:known chromosome:NCBIM37:4:61458660:61461271:1 gene:ENSMUSG00000081207 gene_biotype:processed_transcript transcript_biotype:processed_transcript	FALSE	---	---	---	---	---	---	---	---
10512350	0.610709	0.00304164	4933409K07Rik	NR_033123	RefSeq	Mus musculus RIKEN cDNA 4933409K07 gene (4933409K07Rik), non-coding RNA.	FALSE	---	---	---	---	---	---	---	---
10512352	0.610709	0.00304164	4933409K07Rik	NR_033123	RefSeq	Mus musculus RIKEN cDNA 4933409K07 gene (4933409K07Rik), non-coding RNA.	FALSE	---	---	---	---	---	---	---	---
10531994	1.20653	0.00443818	Gbp6	NM_194336	RefSeq	Mus musculus guanylate binding protein 6 (Gbp6), mRNA.	FALSE	GO:0035458 // GO:0042832 // GO:0050830 // GO:0050830 // GO:0051856 // GO:0071222 // GO:0071346	cellular response to interferon-beta // defense response to protozoan // defense response to Gram-positive bacterium // defense response to Gram-positive bacterium // adhesion to symbiont // cellular response to lipopolysaccharide // cellular response to interferon-gamma	GO:0020005 // GO:0031410	symbiont-containing vacuole membrane // cytoplasmic vesicle	GO:0003674	molecular_function	---	---
10558088	0.766487	0.0010871	---	ENSMUST00000083829	ENSEMBL	ncrna:snRNA chromosome:NCBIM37:7:137178608:137178717:1 gene:ENSMUSG00000065763 gene_biotype:snRNA transcript_biotype:snRNA	FALSE	---	---	---	---	---	---	---	---
10566672	0.934778	0.00340445	Olfr480	NM_020291	RefSeq	Mus musculus olfactory receptor 480 (Olfr480), mRNA.	FALSE	GO:0007165 // GO:0007186 // GO:0007608 // GO:0050896	signal transduction // G-protein coupled receptor signaling pathway // sensory perception of smell // response to stimulus	GO:0005886 // GO:0016020 // GO:0016021	plasma membrane // membrane // integral to membrane	GO:0004871 // GO:0004872 // GO:0004930 // GO:0004984	signal transducer activity // receptor activity // G-protein coupled receptor activity // olfactory receptor activity	---	---
10572212	0.630845	9.37147e-05	Gmip	NM_198101	RefSeq	Mus musculus Gem-interacting protein (Gmip), mRNA.	FALSE	GO:0007165 // GO:0032321 // GO:0034259 // GO:0035556	signal transduction // positive regulation of Rho GTPase activity // negative regulation of Rho GTPase activity // intracellular signal transduction	GO:0005622	intracellular	GO:0005096 // GO:0005100 // GO:0046872	GTPase activator activity // Rho GTPase activator activity // metal ion binding	---	---
10573348	0.710315	0.00246993	Cacna1a	NM_007578	RefSeq	Mus musculus calcium channel, voltage-dependent, P/Q type, alpha 1A subunit (Cacna1a), mRNA.	FALSE	GO:0000096 // GO:0006006 // GO:0006810 // GO:0006811 // GO:0006816 // GO:0006816 // GO:0007204 // GO:0007214 // GO:0007268 // GO:0007268 // GO:0007270 // GO:0007274 // GO:0007416 // GO:0007628 // GO:0007628 // GO:0008219 // GO:0014051 // GO:0014056 // GO:0016049 // GO:0017156 // GO:0017158 // GO:0019226 // GO:0021522 // GO:0021590 // GO:0021679 // GO:0021680 // GO:0021702 // GO:0021750 // GO:0021…	sulfur amino acid metabolic process // glucose metabolic process // transport // ion transport // calcium ion transport // calcium ion transport // elevation of cytosolic calcium ion concentration // gamma-aminobutyric acid signaling pathway // synaptic transmission // synaptic transmission // neuron-neuron synaptic transmission // neuromuscular synaptic transmission // synapse assembly // adult …	GO:0005634 // GO:0005737 // GO:0005886 // GO:0005891 // GO:0005891 // GO:0016020 // GO:0016021 // GO:0030425 // GO:0042995 // GO:0043025 // GO:0043204	nucleus // cytoplasm // plasma membrane // voltage-gated calcium channel complex // voltage-gated calcium channel complex // membrane // integral to membrane // dendrite // cell projection // neuronal cell body // perikaryon	GO:0003677 // GO:0005216 // GO:0005244 // GO:0005245 // GO:0005245 // GO:0005245 // GO:0005262 // GO:0005515 // GO:0005516 // GO:0008331 // GO:0008331 // GO:0019905	DNA binding // ion channel activity // voltage-gated ion channel activity // voltage-gated calcium channel activity // voltage-gated calcium channel activity // voltage-gated calcium channel activity // calcium channel activity // protein binding // calmodulin binding // high voltage-gated calcium channel activity // high voltage-gated calcium channel activity // syntaxin binding	---	---
10578955	0.789164	0.00471168	---	---	---	---	---	---	---	---	---	---	---	---	---
10581448	2.27353	0.000477172	Dpep2	ENSMUST00000150001	ENSEMBL	cdna:known chromosome:NCBIM37:8:108511647:108515622:-1 gene:ENSMUSG00000053687 gene_biotype:protein_coding transcript_biotype:retained_intron	FALSE	GO:0006508 // GO:0008152	proteolysis // metabolic process	GO:0005575 // GO:0016020 // GO:0031225	cellular_component // membrane // anchored to membrane	GO:0008233 // GO:0008235 // GO:0008237 // GO:0008238 // GO:0008239 // GO:0016787 // GO:0016805 // GO:0046872	peptidase activity // metalloexopeptidase activity // metallopeptidase activity // exopeptidase activity // dipeptidyl-peptidase activity // hydrolase activity // dipeptidase activity // metal ion binding	---	---
10593316	0.883005	0.000128946	---	---	---	---	---	---	---	---	---	---	---	---	---
10601768	1.43378	0.00076707	Armcx4	NM_001202500	RefSeq	Mus musculus armadillo repeat containing, X-linked 4 (Armcx4), mRNA.	FALSE	GO:0008150	biological_process	GO:0005575	cellular_component	GO:0003674	molecular_function	---	---
10607419	1.15206	0.00361533	---	ENSMUST00000120072	ENSEMBL	cdna:pseudogene chromosome:NCBIM37:X:150661044:150661642:-1 gene:ENSMUSG00000083978 gene_biotype:pseudogene transcript_biotype:transcribed_processed_pseudogene	FALSE	---	---	---	---	---	---	---	---

## Sheet: up.RA_SAvsWT
Table S2: Lists of genes differentially expressed between wildtype (WT), Rassf1a-/- Sav1+/+ (RA), Rassf1a+/+ Sav1+/- (SA) and Rassf1a-/- Sav1+/- (RA_SA) mouse livers
ID	RA_SA.vs.WT.FC	RA_SA.vs.WT.p	Gene.Symbol	mRNA.Accession	mRNA..Source	mRna...Description	mRNA...xhyb	GO.Biological.Process.ID	GO.Biological.Process.Term	GO.Cellular.Component.ID	GO.Cellular.Component.Term	GO.Molecular.Function.ID	GO.Molecular.Function.Term	Pathway.Source	Pathway.Name
10338364	0.903115	0.00335022	---	---	---	---	---	---	---	---	---	---	---	---	---
10338473	2.78833	0.00293259	---	---	---	---	---	---	---	---	---	---	---	---	---
10339622	2.18446	0.00356426	---	---	---	---	---	---	---	---	---	---	---	---	---
10340733	0.786164	0.00323193	---	---	---	---	---	---	---	---	---	---	---	---	---
10341167	1.17535	0.00153435	---	---	---	---	---	---	---	---	---	---	---	---	---
10341889	0.901026	0.00193009	---	---	---	---	---	---	---	---	---	---	---	---	---
10341983	1.67184	0.00397406	---	---	---	---	---	---	---	---	---	---	---	---	---
10342337	1.22314	0.000469578	---	---	---	---	---	---	---	---	---	---	---	---	---
10342772	0.753345	0.00239716	---	---	---	---	---	---	---	---	---	---	---	---	---
10343781	0.937697	0.0029793	---	---	---	---	---	---	---	---	---	---	---	---	---
10343815	0.801695	0.00048561	---	---	---	---	---	---	---	---	---	---	---	---	---
10344060	1.22122	0.00482387	---	---	---	---	---	---	---	---	---	---	---	---	---
10344063	2.26843	0.00117728	---	---	---	---	---	---	---	---	---	---	---	---	---
10344290	2.74604	0.00492906	---	---	---	---	---	---	---	---	---	---	---	---	---
10344327	0.704374	0.00218286	---	---	---	---	---	---	---	---	---	---	---	---	---
10345675	4.19454	4.80807e-10	Npas2	NM_008719	RefSeq	Mus musculus neuronal PAS domain protein 2 (Npas2), mRNA.	FALSE	GO:0006351 // GO:0006355 // GO:0007165 // GO:0042745 // GO:0045475 // GO:0045944 // GO:0048511	transcription, DNA-dependent // regulation of transcription, DNA-dependent // signal transduction // circadian sleep/wake cycle // locomotor rhythm // positive regulation of transcription from RNA polymerase II promoter // rhythmic process	GO:0005634 // GO:0005667 // GO:0005737	nucleus // transcription factor complex // cytoplasm	GO:0003677 // GO:0003700 // GO:0004871 // GO:0051879	DNA binding // sequence-specific DNA binding transcription factor activity // signal transducer activity // Hsp90 protein binding	---	---
10347310	0.821761	0.000920202	Pnkd	ENSMUST00000027370	ENSEMBL	cdna:known chromosome:NCBIM37:1:74331619:74400258:1 gene:ENSMUSG00000026179 gene_biotype:protein_coding transcript_biotype:protein_coding	FALSE	GO:0008150	biological_process	GO:0005634 // GO:0005737 // GO:0005739 // GO:0005739 // GO:0016020	nucleus // cytoplasm // mitochondrion // mitochondrion // membrane	GO:0003674 // GO:0004416 // GO:0008270 // GO:0016787 // GO:0046872	molecular_function // hydroxyacylglutathione hydrolase activity // zinc ion binding // hydrolase activity // metal ion binding	---	---
10352548	1.44262	6.82257e-06	Slc30a10	NM_001033286	RefSeq	Mus musculus solute carrier family 30, member 10 (Slc30a10), mRNA.	FALSE	GO:0006810 // GO:0006811 // GO:0006812 // GO:0006829 // GO:0008150 // GO:0055085	transport // ion transport // cation transport // zinc ion transport // biological_process // transmembrane transport	GO:0005575 // GO:0005886 // GO:0016020 // GO:0016021	cellular_component // plasma membrane // membrane // integral to membrane	GO:0003674 // GO:0008324	molecular_function // cation transmembrane transporter activity	---	---
10352767	0.598318	0.00168187	Nek2	NM_010892	RefSeq	Mus musculus NIMA (never in mitosis gene a)-related expressed kinase 2 (Nek2), mRNA.	FALSE	GO:0000070 // GO:0006468 // GO:0006468 // GO:0007049 // GO:0007059 // GO:0007067 // GO:0007126 // GO:0016310 // GO:0043392 // GO:0046777 // GO:0051299 // GO:0051301 // GO:0051988	mitotic sister chromatid segregation // protein phosphorylation // protein phosphorylation // cell cycle // chromosome segregation // mitosis // meiosis // phosphorylation // negative regulation of DNA binding // protein autophosphorylation // centrosome separation // cell division // regulation of attachment of spindle microtubules to kinetochore	GO:0000775 // GO:0000776 // GO:0000794 // GO:0000922 // GO:0005634 // GO:0005694 // GO:0005737 // GO:0005813 // GO:0005856 // GO:0005874 // GO:0030496 // GO:0043234	chromosome, centromeric region // kinetochore // condensed nuclear chromosome // spindle pole // nucleus // chromosome // cytoplasm // centrosome // cytoskeleton // microtubule // midbody // protein complex	GO:0000166 // GO:0004672 // GO:0004672 // GO:0004674 // GO:0005515 // GO:0005524 // GO:0016301 // GO:0016740 // GO:0016772 // GO:0019903 // GO:0046872	nucleotide binding // protein kinase activity // protein kinase activity // protein serine/threonine kinase activity // protein binding // ATP binding // kinase activity // transferase activity // transferase activity, transferring phosphorus-containing groups // protein phosphatase binding // metal ion binding	---	---
10352815	0.598945	0.00210698	Irf6	NM_016851	RefSeq	Mus musculus interferon regulatory factor 6 (Irf6), mRNA.	FALSE	GO:0006351 // GO:0006355 // GO:0007050 // GO:0008285 // GO:0008285 // GO:0030154 // GO:0030216 // GO:0043588 // GO:0043588 // GO:0043616 // GO:0043616 // GO:0045893 // GO:0048468	transcription, DNA-dependent // regulation of transcription, DNA-dependent // cell cycle arrest // negative regulation of cell proliferation // negative regulation of cell proliferation // cell differentiation // keratinocyte differentiation // skin development // skin development // keratinocyte proliferation // keratinocyte proliferation // positive regulation of transcription, DNA-dependent //…	GO:0005634 // GO:0005737	nucleus // cytoplasm	GO:0000975 // GO:0003677 // GO:0003700	regulatory region DNA binding // DNA binding // sequence-specific DNA binding transcription factor activity	GenMAPP	Apoptosis
10352867	0.703593	0.00160362	Plxna2	NM_008882	RefSeq	Mus musculus plexin A2 (Plxna2), mRNA.	FALSE	GO:0007165 // GO:0007166 // GO:0007275 // GO:0021935 // GO:0030334 // GO:0051642 // GO:0071526	signal transduction // cell surface receptor signaling pathway // multicellular organismal development // cerebellar granule cell precursor tangential migration // regulation of cell migration // centrosome localization // semaphorin-plexin signaling pathway	GO:0005622 // GO:0005886 // GO:0005887 // GO:0016020 // GO:0016021	intracellular // plasma membrane // integral to plasma membrane // membrane // integral to membrane	GO:0004872 // GO:0017154 // GO:0017154 // GO:0017154	receptor activity // semaphorin receptor activity // semaphorin receptor activity // semaphorin receptor activity	---	---
10355456	0.639217	0.000238319	Mreg	NM_001005423	RefSeq	Mus musculus melanoregulin (Mreg), mRNA.	FALSE	GO:0030318 // GO:0042640 // GO:0043473 // GO:0048066	melanocyte differentiation // anagen // pigmentation // developmental pigmentation	GO:0005886 // GO:0016020	plasma membrane // membrane	---	---	---	---
10356172	0.654327	0.000417206	Pid1	BC080290	GenBank	Mus musculus RIKEN cDNA 5033414K04 gene, mRNA (cDNA clone MGC:90850 IMAGE:6816865), complete cds.	FALSE	GO:0001933 // GO:0010628 // GO:0044320 // GO:0045944 // GO:0046325 // GO:0046627 // GO:0051881 // GO:0070346 // GO:0070584 // GO:0071345 // GO:0071354 // GO:0071356 // GO:0071398 // GO:0090005 // GO:0090298 // GO:2000045 // GO:2000377 // GO:2000379 // GO:2001170 // GO:2001171 // GO:2001274	negative regulation of protein phosphorylation // positive regulation of gene expression // cellular response to leptin stimulus // positive regulation of transcription from RNA polymerase II promoter // negative regulation of glucose import // negative regulation of insulin receptor signaling pathway // regulation of mitochondrial membrane potential // positive regulation of fat cell proliferati…	GO:0005634 // GO:0005737 // GO:0005737 // GO:0005739	nucleus // cytoplasm // cytoplasm // mitochondrion	GO:0005515	protein binding	---	---
10357280	0.92968	0.00352661	Insig2	NM_133748	RefSeq	Mus musculus insulin induced gene 2 (Insig2), transcript variant 1, mRNA.	FALSE	GO:0006629 // GO:0006641 // GO:0006695 // GO:0006991 // GO:0008202 // GO:0008203 // GO:0010894 // GO:0016126 // GO:0030967 // GO:0042472 // GO:0042474 // GO:0045717 // GO:0060021 // GO:0060363	lipid metabolic process // triglyceride metabolic process // cholesterol biosynthetic process // response to sterol depletion // steroid metabolic process // cholesterol metabolic process // negative regulation of steroid biosynthetic process // sterol biosynthetic process // ER-nuclear sterol response pathway // inner ear morphogenesis // middle ear morphogenesis // negative regulation of fatty …	GO:0005783 // GO:0016020 // GO:0016021 // GO:0032937	endoplasmic reticulum // membrane // integral to membrane // SREBP-SCAP-Insig complex	GO:0005515 // GO:0008134	protein binding // transcription factor binding	---	---
10360370	0.61017	0.00232969	BC094916	BC094916	GenBank	Mus musculus cDNA sequence BC094916, mRNA (cDNA clone MGC:107449 IMAGE:30074914), complete cds.	FALSE	GO:0008150	biological_process	GO:0005575 // GO:0005634	cellular_component // nucleus	GO:0003674	molecular_function	---	---
10360631	0.766011	7.20378e-05	Adck3	NM_023341	RefSeq	Mus musculus aarF domain containing kinase 3 (Adck3), nuclear gene encoding mitochondrial protein, transcript variant 1, mRNA.	FALSE	GO:0006468 // GO:0008150 // GO:0016310	protein phosphorylation // biological_process // phosphorylation	GO:0005739	mitochondrion	GO:0000166 // GO:0003674 // GO:0004674 // GO:0005524 // GO:0016301 // GO:0016740 // GO:0016772	nucleotide binding // molecular_function // protein serine/threonine kinase activity // ATP binding // kinase activity // transferase activity // transferase activity, transferring phosphorus-containing groups	---	---
10361381	0.986878	0.000331947	Syne1	ENSMUST00000056571	ENSEMBL	cdna:known chromosome:NCBIM37:10:4804527:5326338:1 gene:ENSMUSG00000019769 gene_biotype:protein_coding transcript_biotype:protein_coding	FALSE	GO:0007030 // GO:0040023 // GO:0042692 // GO:0048260 // GO:0048814 // GO:0090286 // GO:0090292	Golgi organization // establishment of nucleus localization // muscle cell differentiation // positive regulation of receptor-mediated endocytosis // regulation of dendrite morphogenesis // cytoskeletal anchoring at nuclear membrane // nuclear matrix anchoring at nuclear membrane	GO:0005634 // GO:0005635 // GO:0005635 // GO:0005737 // GO:0005794 // GO:0005819 // GO:0005856 // GO:0016020 // GO:0016021 // GO:0030017 // GO:0030496 // GO:0031965 // GO:0034993 // GO:0043197 // GO:0045211 // GO:0048471	nucleus // nuclear envelope // nuclear envelope // cytoplasm // Golgi apparatus // spindle // cytoskeleton // membrane // integral to membrane // sarcomere // midbody // nuclear membrane // SUN-KASH complex // dendritic spine // postsynaptic membrane // perinuclear region of cytoplasm	GO:0003779 // GO:0005102 // GO:0005515 // GO:0005521 // GO:0019899	actin binding // receptor binding // protein binding // lamin binding // enzyme binding	---	---
10361509	1.00783	7.77575e-05	Syne1	ENSMUST00000056571	ENSEMBL	cdna:known chromosome:NCBIM37:10:4804527:5326338:1 gene:ENSMUSG00000019769 gene_biotype:protein_coding transcript_biotype:protein_coding	FALSE	GO:0007030 // GO:0040023 // GO:0042692 // GO:0048260 // GO:0048814 // GO:0090286 // GO:0090292	Golgi organization // establishment of nucleus localization // muscle cell differentiation // positive regulation of receptor-mediated endocytosis // regulation of dendrite morphogenesis // cytoskeletal anchoring at nuclear membrane // nuclear matrix anchoring at nuclear membrane	GO:0005634 // GO:0005635 // GO:0005635 // GO:0005737 // GO:0005794 // GO:0005819 // GO:0005856 // GO:0016020 // GO:0016021 // GO:0030017 // GO:0030496 // GO:0031965 // GO:0034993 // GO:0043197 // GO:0045211 // GO:0048471	nucleus // nuclear envelope // nuclear envelope // cytoplasm // Golgi apparatus // spindle // cytoskeleton // membrane // integral to membrane // sarcomere // midbody // nuclear membrane // SUN-KASH complex // dendritic spine // postsynaptic membrane // perinuclear region of cytoplasm	GO:0003779 // GO:0005102 // GO:0005515 // GO:0005521 // GO:0019899	actin binding // receptor binding // protein binding // lamin binding // enzyme binding	---	---
10361828	0.817518	0.00189251	Cited2	NM_010828	RefSeq	Mus musculus Cbp/p300-interacting transactivator, with Glu/Asp-rich carboxy-terminal domain, 2 (Cited2), mRNA.	FALSE	GO:0000122 // GO:0001568 // GO:0001570 // GO:0001666 // GO:0001701 // GO:0001829 // GO:0001841 // GO:0001843 // GO:0001889 // GO:0001892 // GO:0001944 // GO:0001944 // GO:0001947 // GO:0002089 // GO:0002244 // GO:0002521 // GO:0003151 // GO:0003197 // GO:0003281 // GO:0006355 // GO:0006357 // GO:0007179 // GO:0007417 // GO:0007422 // GO:0007507 // GO:0008283 // GO:0008584 // GO:0010628 // GO:0010…	negative regulation of transcription from RNA polymerase II promoter // blood vessel development // vasculogenesis // response to hypoxia // in utero embryonic development // trophectodermal cell differentiation // neural tube formation // neural tube closure // liver development // embryonic placenta development // vasculature development // vasculature development // heart looping // lens morph…	GO:0005634 // GO:0005634 // GO:0005737	nucleus // nucleus // cytoplasm	GO:0001102 // GO:0001105 // GO:0003682 // GO:0003712 // GO:0003713 // GO:0003714 // GO:0046332 // GO:0050693	RNA polymerase II activating transcription factor binding // RNA polymerase II transcription coactivator activity // chromatin binding // transcription cofactor activity // transcription coactivator activity // transcription corepressor activity // SMAD binding // LBD domain binding	---	---
10363575	0.632252	0.00307428	Dna2	NM_177372	RefSeq	Mus musculus DNA replication helicase 2 homolog (yeast) (Dna2), mRNA.	FALSE	GO:0006260 // GO:0006264 // GO:0006284 // GO:0043137 // GO:0043504 // GO:0045740	DNA replication // mitochondrial DNA replication // base-excision repair // DNA replication, removal of RNA primer // mitochondrial DNA repair // positive regulation of DNA replication	GO:0005634 // GO:0042645	nucleus // mitochondrial nucleoid	GO:0000166 // GO:0003677 // GO:0004003 // GO:0004386 // GO:0005524 // GO:0016787 // GO:0016890 // GO:0017108	nucleotide binding // DNA binding // ATP-dependent DNA helicase activity // helicase activity // ATP binding // hydrolase activity // site-specific endodeoxyribonuclease activity, specific for altered base // 5'-flap endonuclease activity	---	---
10363762	1.09078	0.00213123	Tmem26	NM_177794	RefSeq	Mus musculus transmembrane protein 26 (Tmem26), mRNA.	FALSE	GO:0008150	biological_process	GO:0005575 // GO:0016020 // GO:0016021	cellular_component // membrane // integral to membrane	GO:0003674	molecular_function	---	---
10365384	0.793737	0.00306924	Rfx4	NM_001024918	RefSeq	Mus musculus regulatory factor X, 4 (influences HLA class II expression) (Rfx4), transcript variant 1, mRNA.	FALSE	GO:0006351 // GO:0006355 // GO:0006357 // GO:0021516 // GO:0021696 // GO:0030900 // GO:0030901 // GO:0045944	transcription, DNA-dependent // regulation of transcription, DNA-dependent // regulation of transcription from RNA polymerase II promoter // dorsal spinal cord development // cerebellar cortex morphogenesis // forebrain development // midbrain development // positive regulation of transcription from RNA polymerase II promoter	GO:0005634	nucleus	GO:0003677 // GO:0003682 // GO:0005515	DNA binding // chromatin binding // protein binding	---	---
10366707	0.746064	0.000414077	Avpr1a	NM_016847	RefSeq	Mus musculus arginine vasopressin receptor 1A (Avpr1a), mRNA.	FALSE	GO:0001992 // GO:0002125 // GO:0003084 // GO:0006950 // GO:0007165 // GO:0007186 // GO:0007204 // GO:0007621 // GO:0007625 // GO:0008284 // GO:0010033 // GO:0010035 // GO:0010460 // GO:0014049 // GO:0019722 // GO:0030307 // GO:0031394 // GO:0032849 // GO:0035176 // GO:0035815 // GO:0042711 // GO:0042713 // GO:0043084 // GO:0045777 // GO:0045907 // GO:0051970	regulation of systemic arterial blood pressure by vasopressin // maternal aggressive behavior // positive regulation of systemic arterial blood pressure // response to stress // signal transduction // G-protein coupled receptor signaling pathway // elevation of cytosolic calcium ion concentration // negative regulation of female receptivity // grooming behavior // positive regulation of cell prol…	GO:0005886 // GO:0016020 // GO:0016021 // GO:0031410	plasma membrane // membrane // integral to membrane // cytoplasmic vesicle	GO:0004871 // GO:0004872 // GO:0004930 // GO:0005000 // GO:0017046 // GO:0031894	signal transducer activity // receptor activity // G-protein coupled receptor activity // vasopressin receptor activity // peptide hormone binding // V1A vasopressin receptor binding	---	---
10367066	0.620712	0.00278791	Sdr9c7	NM_027301	RefSeq	Mus musculus 4short chain dehydrogenase/reductase family 9C, member 7 (Sdr9c7), mRNA.	FALSE	GO:0008152 // GO:0055114	metabolic process // oxidation-reduction process	GO:0005730 // GO:0005737	nucleolus // cytoplasm	GO:0000166 // GO:0004745 // GO:0016491	nucleotide binding // retinol dehydrogenase activity // oxidoreductase activity	---	---
10367292	0.628989	0.000147572	Cs	NM_026444	RefSeq	Mus musculus citrate synthase (Cs), nuclear gene encoding mitochondrial protein, mRNA.	FALSE	GO:0005975 // GO:0006084 // GO:0006099 // GO:0006101 // GO:0006107 // GO:0008152 // GO:0008152 // GO:0044262	carbohydrate metabolic process // acetyl-CoA metabolic process // tricarboxylic acid cycle // citrate metabolic process // oxaloacetate metabolic process // metabolic process // metabolic process // cellular carbohydrate metabolic process	GO:0005739 // GO:0005739 // GO:0005759	mitochondrion // mitochondrion // mitochondrial matrix	GO:0004108 // GO:0016740 // GO:0046912	citrate (Si)-synthase activity // transferase activity // transferase activity, transferring acyl groups, acyl groups converted into alkyl on transfer	GenMAPP	Krebs-TCA_Cycle
10367728	0.909081	0.000131253	Tab2	NM_138667	RefSeq	Mus musculus TGF-beta activated kinase 1/MAP3K7 binding protein 2 (Tab2), mRNA.	FALSE	GO:0007507 // GO:0045860	heart development // positive regulation of protein kinase activity	GO:0005622 // GO:0005625 // GO:0005634 // GO:0005737	intracellular // soluble fraction // nucleus // cytoplasm	GO:0005515 // GO:0008270 // GO:0046872 // GO:0070530	protein binding // zinc ion binding // metal ion binding // K63-linked polyubiquitin binding	GenMAPP	Circadian_Exercise
10369276	0.755401	3.47295e-05	Ccdc109a	NM_001033259	RefSeq	Mus musculus coiled-coil domain containing 109A (Ccdc109a), nuclear gene encoding mitochondrial protein, mRNA.	FALSE	GO:0006810 // GO:0006811 // GO:0006816 // GO:0006851 // GO:0006851 // GO:0019722 // GO:0035786 // GO:0051561 // GO:0051561 // GO:0070588	transport // ion transport // calcium ion transport // mitochondrial calcium ion transport // mitochondrial calcium ion transport // calcium-mediated signaling // protein complex oligomerization // elevation of mitochondrial calcium ion concentration // elevation of mitochondrial calcium ion concentration // calcium ion transmembrane transport	GO:0005739 // GO:0005743 // GO:0016020 // GO:0016021	mitochondrion // mitochondrial inner membrane // membrane // integral to membrane	GO:0005262	calcium channel activity	---	---
10371111	0.87914	0.00104905	Tjp3	NM_013769	RefSeq	Mus musculus tight junction protein 3 (Tjp3), mRNA.	FALSE	GO:0008150	biological_process	GO:0005923 // GO:0009986 // GO:0016324	tight junction // cell surface // apical plasma membrane	GO:0003674	molecular_function	---	---
10372116	0.589023	0.00216352	Csl	NM_027945	RefSeq	Mus musculus citrate synthase like (Csl), mRNA.	FALSE	GO:0008150 // GO:0008152	biological_process // metabolic process	GO:0005739	mitochondrion	GO:0003674 // GO:0016740	molecular_function // transferase activity	---	---
10375002	0.822287	0.00192561	Cpeb4	NM_026252	RefSeq	Mus musculus cytoplasmic polyadenylation element binding protein 4 (Cpeb4), mRNA.	FALSE	GO:0008150	biological_process	GO:0045202	synapse	GO:0000166 // GO:0003676 // GO:0003723	nucleotide binding // nucleic acid binding // RNA binding	---	---
10375704	0.778103	0.00126157	3010026O09Rik	NM_026543	RefSeq	Mus musculus RIKEN cDNA 3010026O09 gene (3010026O09Rik), mRNA.	FALSE	GO:0008150	biological_process	GO:0005575	cellular_component	GO:0003674	molecular_function	---	---
10377215	0.9732	0.000524632	Gas7	NM_008088	RefSeq	Mus musculus growth arrest specific 7 (Gas7), transcript variant 1, mRNA.	FALSE	GO:0008360 // GO:0030041 // GO:0030182 // GO:0048812 // GO:0051017	regulation of cell shape // actin filament polymerization // neuron differentiation // neuron projection morphogenesis // actin filament bundle assembly	GO:0001726 // GO:0005884	ruffle // actin filament	GO:0051015	actin filament binding	---	---
10378385	0.779788	0.00299987	Spata22	NM_001045531	RefSeq	Mus musculus spermatogenesis associated 22 (Spata22), mRNA.	FALSE	GO:0008150	biological_process	GO:0005575	cellular_component	GO:0003674	molecular_function	---	---
10379262	0.681678	0.00292191	Nf1	NM_010897	RefSeq	Mus musculus neurofibromatosis 1 (Nf1), mRNA.	FALSE	GO:0000165 // GO:0001649 // GO:0001656 // GO:0001666 // GO:0001889 // GO:0001937 // GO:0001937 // GO:0001938 // GO:0001952 // GO:0001953 // GO:0006469 // GO:0006469 // GO:0007154 // GO:0007165 // GO:0007265 // GO:0007265 // GO:0007406 // GO:0007420 // GO:0007422 // GO:0007507 // GO:0007519 // GO:0008285 // GO:0008285 // GO:0008542 // GO:0008542 // GO:0014044 // GO:0014065 // GO:0016525 // GO:0021…	MAPK cascade // osteoblast differentiation // metanephros development // response to hypoxia // liver development // negative regulation of endothelial cell proliferation // negative regulation of endothelial cell proliferation // positive regulation of endothelial cell proliferation // regulation of cell-matrix adhesion // negative regulation of cell-matrix adhesion // negative regulation of pro…	GO:0005622 // GO:0005624 // GO:0005634 // GO:0005737 // GO:0005737 // GO:0014069 // GO:0019717 // GO:0030424 // GO:0030425 // GO:0031235 // GO:0043234	intracellular // membrane fraction // nucleus // cytoplasm // cytoplasm // postsynaptic density // synaptosome // axon // dendrite // intrinsic to internal side of plasma membrane // protein complex	GO:0005096 // GO:0005099 // GO:0005099 // GO:0005515 // GO:0008017 // GO:0045545	GTPase activator activity // Ras GTPase activator activity // Ras GTPase activator activity // protein binding // microtubule binding // syndecan binding	---	---
10379765	0.706171	0.00138343	Hnf1b	NM_009330	RefSeq	Mus musculus HNF1 homeobox B (Hnf1b), mRNA.	FALSE	GO:0000122 // GO:0001706 // GO:0001714 // GO:0001822 // GO:0001822 // GO:0001826 // GO:0001889 // GO:0006351 // GO:0006355 // GO:0007492 // GO:0009749 // GO:0009790 // GO:0009952 // GO:0010628 // GO:0030073 // GO:0030111 // GO:0030902 // GO:0031018 // GO:0032922 // GO:0035565 // GO:0039020 // GO:0042663 // GO:0043066 // GO:0045893 // GO:0045893 // GO:0045944 // GO:0045944 // GO:0048557 // GO:0048…	negative regulation of transcription from RNA polymerase II promoter // endoderm formation // endodermal cell fate specification // kidney development // kidney development // inner cell mass cell differentiation // liver development // transcription, DNA-dependent // regulation of transcription, DNA-dependent // endoderm development // response to glucose stimulus // embryo development // anteri…	GO:0005634 // GO:0005634 // GO:0005667	nucleus // nucleus // transcription factor complex	GO:0001159 // GO:0003677 // GO:0003677 // GO:0003700 // GO:0003700 // GO:0003705 // GO:0003705 // GO:0005515 // GO:0032403 // GO:0042803 // GO:0042803 // GO:0042803 // GO:0043565 // GO:0044212 // GO:0046982 // GO:0046982	core promoter proximal region DNA binding // DNA binding // DNA binding // sequence-specific DNA binding transcription factor activity // sequence-specific DNA binding transcription factor activity // RNA polymerase II distal enhancer sequence-specific DNA binding transcription factor activity // RNA polymerase II distal enhancer sequence-specific DNA binding transcription factor activity // prot…	---	---
10380560	0.764137	0.000472127	Zfp652	NM_201609	RefSeq	Mus musculus zinc finger protein 652 (Zfp652), mRNA.	FALSE	GO:0006351 // GO:0006355 // GO:0008150	transcription, DNA-dependent // regulation of transcription, DNA-dependent // biological_process	GO:0005622 // GO:0005634	intracellular // nucleus	GO:0003676 // GO:0003677 // GO:0008270 // GO:0046872	nucleic acid binding // DNA binding // zinc ion binding // metal ion binding	---	---
10380823	0.630882	0.00204987	Lasp1	NM_010688	RefSeq	Mus musculus LIM and SH3 protein 1 (Lasp1), mRNA.	FALSE	GO:0006810 // GO:0006811 // GO:0034220	transport // ion transport // ion transmembrane transport	GO:0005737 // GO:0005856 // GO:0005925 // GO:0030864	cytoplasm // cytoskeleton // focal adhesion // cortical actin cytoskeleton	GO:0003779 // GO:0005515 // GO:0008270 // GO:0015075 // GO:0046872 // GO:0051015	actin binding // protein binding // zinc ion binding // ion transmembrane transporter activity // metal ion binding // actin filament binding	---	---
10382912	0.752923	3.78952e-05	2016-09-09	NM_001113486	RefSeq	Mus musculus septin 9 (Sept9), transcript variant 1, mRNA.	FALSE	GO:0007049 // GO:0051291 // GO:0051301	cell cycle // protein heterooligomerization // cell division	GO:0001725 // GO:0005737 // GO:0005856 // GO:0005874 // GO:0048471	stress fiber // cytoplasm // cytoskeleton // microtubule // perinuclear region of cytoplasm	GO:0000166 // GO:0005525	nucleotide binding // GTP binding	---	---
10384378	1.16395	1.1209e-06	Ddc	NM_001190448	RefSeq	Mus musculus dopa decarboxylase (Ddc), transcript variant 1, mRNA.	FALSE	GO:0006520 // GO:0009636 // GO:0015842 // GO:0019752 // GO:0042416 // GO:0042423 // GO:0042427	cellular amino acid metabolic process // response to toxin // synaptic vesicle amine transport // carboxylic acid metabolic process // dopamine biosynthetic process // catecholamine biosynthetic process // serotonin biosynthetic process	GO:0005625 // GO:0005737 // GO:0008021 // GO:0030424 // GO:0043025	soluble fraction // cytoplasm // synaptic vesicle // axon // neuronal cell body	GO:0003824 // GO:0004058 // GO:0016597 // GO:0016829 // GO:0016831 // GO:0019904 // GO:0030170	catalytic activity // aromatic-L-amino-acid decarboxylase activity // amino acid binding // lyase activity // carboxy-lyase activity // protein domain specific binding // pyridoxal phosphate binding	GenMAPP	Biogenic_Amine_Synthesis
10384572	0.662225	0.0015909	1110067D22Rik	NM_173752	RefSeq	Mus musculus RIKEN cDNA 1110067D22 gene (1110067D22Rik), mRNA.	FALSE	GO:0008150	biological_process	GO:0005622	intracellular	GO:0003674 // GO:0030246	molecular_function // carbohydrate binding	---	---
10385365	0.611444	0.0027934	Lsm11	NM_028185	RefSeq	Mus musculus U7 snRNP-specific Sm-like protein LSM11 (Lsm11), mRNA.	FALSE	GO:0000084 // GO:0006397 // GO:0006398	S phase of mitotic cell cycle // mRNA processing // histone mRNA 3'-end processing	GO:0005634 // GO:0005683 // GO:0005683 // GO:0030529 // GO:0071204	nucleus // U7 snRNP // U7 snRNP // ribonucleoprotein complex // histone pre-mRNA 3'end processing complex	GO:0003723 // GO:0005515 // GO:0071209	RNA binding // protein binding // U7 snRNA binding	---	---
10390691	0.903236	0.000421694	Nr1d1	NM_145434	RefSeq	Mus musculus nuclear receptor subfamily 1, group D, member 1 (Nr1d1), mRNA.	FALSE	GO:0000122 // GO:0006351 // GO:0006355 // GO:0007623 // GO:0010871 // GO:0034144 // GO:0043401 // GO:0071222	negative regulation of transcription from RNA polymerase II promoter // transcription, DNA-dependent // regulation of transcription, DNA-dependent // circadian rhythm // negative regulation of receptor biosynthetic process // negative regulation of toll-like receptor 4 signaling pathway // steroid hormone mediated signaling pathway // cellular response to lipopolysaccharide	GO:0000790 // GO:0005634	nuclear chromatin // nucleus	GO:0003677 // GO:0003700 // GO:0003707 // GO:0004872 // GO:0008270 // GO:0043565 // GO:0044212 // GO:0046872	DNA binding // sequence-specific DNA binding transcription factor activity // steroid hormone receptor activity // receptor activity // zinc ion binding // sequence-specific DNA binding // transcription regulatory region DNA binding // metal ion binding	---	---
10392183	0.627741	0.000420145	Ern1	NM_023913	RefSeq	Mus musculus endoplasmic reticulum (ER) to nucleus signalling 1 (Ern1), mRNA.	FALSE	GO:0006351 // GO:0006355 // GO:0006397 // GO:0006468 // GO:0006468 // GO:0006915 // GO:0006917 // GO:0006950 // GO:0006986 // GO:0006987 // GO:0007050 // GO:0008152 // GO:0016310 // GO:0030968 // GO:0046777 // GO:1900103	transcription, DNA-dependent // regulation of transcription, DNA-dependent // mRNA processing // protein phosphorylation // protein phosphorylation // apoptotic process // induction of apoptosis // response to stress // response to unfolded protein // activation of signaling protein activity involved in unfolded protein response // cell cycle arrest // metabolic process // phosphorylation // endo…	GO:0005637 // GO:0005783 // GO:0005789 // GO:0016020 // GO:0016021 // GO:0030176	nuclear inner membrane // endoplasmic reticulum // endoplasmic reticulum membrane // membrane // integral to membrane // integral to endoplasmic reticulum membrane	GO:0000166 // GO:0000287 // GO:0003824 // GO:0004519 // GO:0004521 // GO:0004521 // GO:0004672 // GO:0004674 // GO:0005524 // GO:0016301 // GO:0016740 // GO:0016772 // GO:0016787 // GO:0016891 // GO:0046872	nucleotide binding // magnesium ion binding // catalytic activity // endonuclease activity // endoribonuclease activity // endoribonuclease activity // protein kinase activity // protein serine/threonine kinase activity // ATP binding // kinase activity // transferase activity // transferase activity, transferring phosphorus-containing groups // hydrolase activity // endoribonuclease activity, pr…	---	---
10394862	1.09986	3.9144e-05	Asap2	NM_001135192	RefSeq	Mus musculus ArfGAP with SH3 domain, ankyrin repeat and PH domain 2 (Asap2), transcript variant 3, mRNA.	FALSE	GO:0008150 // GO:0032312	biological_process // regulation of ARF GTPase activity	GO:0005575 // GO:0005737 // GO:0005794 // GO:0005886 // GO:0016020	cellular_component // cytoplasm // Golgi apparatus // plasma membrane // membrane	GO:0003674 // GO:0005096 // GO:0005543 // GO:0008060 // GO:0008270 // GO:0046872	molecular_function // GTPase activator activity // phospholipid binding // ARF GTPase activator activity // zinc ion binding // metal ion binding	---	---
10398665	0.913413	0.00326477	Tnfaip2	NM_009396	RefSeq	Mus musculus tumor necrosis factor, alpha-induced protein 2 (Tnfaip2), mRNA.	FALSE	GO:0001525 // GO:0007275 // GO:0030154	angiogenesis // multicellular organismal development // cell differentiation	---	---	---	---	---	---
10399419	1.13368	7.5829e-05	Tubb2b	NM_023716	RefSeq	Mus musculus tubulin, beta 2B class IIB (Tubb2b), mRNA.	FALSE	GO:0001764 // GO:0006184 // GO:0007017 // GO:0007018 // GO:0051258	neuron migration // GTP catabolic process // microtubule-based process // microtubule-based movement // protein polymerization	GO:0005737 // GO:0005856 // GO:0005874 // GO:0043234	cytoplasm // cytoskeleton // microtubule // protein complex	GO:0000166 // GO:0003924 // GO:0005198 // GO:0005525	nucleotide binding // GTPase activity // structural molecule activity // GTP binding	---	---
10403743	0.943552	0.00144239	Inhba	NM_008380	RefSeq	Mus musculus inhibin beta-A (Inhba), mRNA.	FALSE	GO:0000082 // GO:0001541 // GO:0001707 // GO:0001942 // GO:0002244 // GO:0002244 // GO:0006357 // GO:0006917 // GO:0007050 // GO:0008285 // GO:0008584 // GO:0010862 // GO:0030308 // GO:0032925 // GO:0040007 // GO:0042476 // GO:0042541 // GO:0042701 // GO:0045648 // GO:0045786 // GO:0045893 // GO:0045893 // GO:0045944 // GO:0045944 // GO:0046880 // GO:0048333 // GO:0051799 // GO:0060021 // GO:0060…	G1/S transition of mitotic cell cycle // ovarian follicle development // mesoderm formation // hair follicle development // hemopoietic progenitor cell differentiation // hemopoietic progenitor cell differentiation // regulation of transcription from RNA polymerase II promoter // induction of apoptosis // cell cycle arrest // negative regulation of cell proliferation // male gonad development // …	GO:0005576 // GO:0043509 // GO:0043512	extracellular region // activin A complex // inhibin A complex	GO:0005102 // GO:0005125 // GO:0005179 // GO:0008083 // GO:0042802 // GO:0046982 // GO:0070699	receptor binding // cytokine activity // hormone activity // growth factor activity // identical protein binding // protein heterodimerization activity // type II activin receptor binding	GenMAPP	TGF_Beta_Signaling_Pathway
10404965	0.607543	0.00165057	Rnf144b	NM_146042	RefSeq	Mus musculus ring finger protein 144B (Rnf144b), transcript variant 1, mRNA.	FALSE	GO:0006915 // GO:0042787 // GO:0045768	apoptotic process // protein ubiquitination involved in ubiquitin-dependent protein catabolic process // positive regulation of anti-apoptosis	GO:0005737 // GO:0005739 // GO:0016020 // GO:0016021 // GO:0031966	cytoplasm // mitochondrion // membrane // integral to membrane // mitochondrial membrane	GO:0004842 // GO:0008270 // GO:0016874 // GO:0046872	ubiquitin-protein ligase activity // zinc ion binding // ligase activity // metal ion binding	---	---
10405924	0.760091	0.000760318	---	---	---	---	---	---	---	---	---	---	---	---	---
10408610	1.66363	3.01697e-05	Tubb2a	NM_009450	RefSeq	Mus musculus tubulin, beta 2A class IIA (Tubb2a), mRNA.	FALSE	GO:0006184 // GO:0007017 // GO:0007018 // GO:0051258	GTP catabolic process // microtubule-based process // microtubule-based movement // protein polymerization	GO:0005737 // GO:0005856 // GO:0005874 // GO:0043234	cytoplasm // cytoskeleton // microtubule // protein complex	GO:0000166 // GO:0003924 // GO:0005198 // GO:0005525	nucleotide binding // GTPase activity // structural molecule activity // GTP binding	---	---
10408613	1.74153	2.96791e-05	Tubb2b	NM_023716	RefSeq	Mus musculus tubulin, beta 2B class IIB (Tubb2b), mRNA.	FALSE	GO:0001764 // GO:0006184 // GO:0007017 // GO:0007018 // GO:0051258	neuron migration // GTP catabolic process // microtubule-based process // microtubule-based movement // protein polymerization	GO:0005737 // GO:0005856 // GO:0005874 // GO:0043234	cytoplasm // cytoskeleton // microtubule // protein complex	GO:0000166 // GO:0003924 // GO:0005198 // GO:0005525	nucleotide binding // GTPase activity // structural molecule activity // GTP binding	---	---
10422822	0.642916	0.00308055	Lifr	NM_013584	RefSeq	Mus musculus leukemia inhibitory factor receptor (Lifr), transcript variant 1, mRNA.	FALSE	GO:0008284 // GO:0008284 // GO:0019221 // GO:0031100 // GO:0034097 // GO:0038165 // GO:0045768 // GO:0048812 // GO:0048861 // GO:0070120	positive regulation of cell proliferation // positive regulation of cell proliferation // cytokine-mediated signaling pathway // organ regeneration // response to cytokine stimulus // oncostatin-M-mediated signaling pathway // positive regulation of anti-apoptosis // neuron projection morphogenesis // leukemia inhibitory factor signaling pathway // ciliary neurotrophic factor-mediated signaling p…	GO:0005576 // GO:0005886 // GO:0016020 // GO:0016021	extracellular region // plasma membrane // membrane // integral to membrane	GO:0004872 // GO:0004896 // GO:0004923 // GO:0005127 // GO:0005515 // GO:0019838 // GO:0019955 // GO:0046982	receptor activity // cytokine receptor activity // leukemia inhibitory factor receptor activity // ciliary neurotrophic factor receptor binding // protein binding // growth factor binding // cytokine binding // protein heterodimerization activity	---	---
10423053	0.63236	0.00313687	Agxt2	NM_001031851	RefSeq	Mus musculus alanine-glyoxylate aminotransferase 2 (Agxt2), nuclear gene encoding mitochondrial protein, mRNA.	FALSE	GO:0008152 // GO:0009436 // GO:0019265 // GO:0019481 // GO:0045429	metabolic process // glyoxylate catabolic process // glycine biosynthetic process, by transamination of glyoxylate // L-alanine catabolic process, by transamination // positive regulation of nitric oxide biosynthetic process	GO:0005739 // GO:0005739	mitochondrion // mitochondrion	GO:0003824 // GO:0008453 // GO:0008483 // GO:0016740 // GO:0030170 // GO:0047305	catalytic activity // alanine-glyoxylate transaminase activity // transaminase activity // transferase activity // pyridoxal phosphate binding // (R)-3-amino-2-methylpropionate-pyruvate transaminase activity	---	---
10427744	0.651296	0.000849151	Rai14	NM_030690	RefSeq	Mus musculus retinoic acid induced 14 (Rai14), transcript variant 1, mRNA.	FALSE	---	---	GO:0005737 // GO:0005739 // GO:0005856	cytoplasm // mitochondrion // cytoskeleton	---	---	---	---
10427772	0.931414	0.000344518	Tars	NM_033074	RefSeq	Mus musculus threonyl-tRNA synthetase (Tars), mRNA.	FALSE	GO:0006412 // GO:0006418 // GO:0006435 // GO:0043039	translation // tRNA aminoacylation for protein translation // threonyl-tRNA aminoacylation // tRNA aminoacylation	GO:0005737 // GO:0015629	cytoplasm // actin cytoskeleton	GO:0000166 // GO:0004812 // GO:0004829 // GO:0005524 // GO:0016874 // GO:0016876	nucleotide binding // aminoacyl-tRNA ligase activity // threonine-tRNA ligase activity // ATP binding // ligase activity // ligase activity, forming aminoacyl-tRNA and related compounds	---	---
10429140	1.6062	4.13221e-08	Ndrg1	NM_008681	RefSeq	Mus musculus N-myc downstream regulated gene 1 (Ndrg1), mRNA.	FALSE	GO:0032287 // GO:0045576 // GO:0090232	peripheral nervous system myelin maintenance // mast cell activation // positive regulation of spindle checkpoint	GO:0005634 // GO:0005737 // GO:0005737 // GO:0005813 // GO:0005856 // GO:0005874 // GO:0005886 // GO:0005913 // GO:0015630 // GO:0016020 // GO:0048471 // GO:0055038	nucleus // cytoplasm // cytoplasm // centrosome // cytoskeleton // microtubule // plasma membrane // cell-cell adherens junction // microtubule cytoskeleton // membrane // perinuclear region of cytoplasm // recycling endosome membrane	GO:0008017 // GO:0017137 // GO:0043015 // GO:0045296	microtubule binding // Rab GTPase binding // gamma-tubulin binding // cadherin binding	---	---
10431035	0.692143	0.00180988	Ttll12	NM_183017	RefSeq	Mus musculus tubulin tyrosine ligase-like family, member 12 (Ttll12), mRNA.	FALSE	GO:0006464 // GO:0008150	cellular protein modification process // biological_process	GO:0005575	cellular_component	GO:0003674 // GO:0004835	molecular_function // tubulin-tyrosine ligase activity	---	---
10431546	0.75172	0.00020659	Tymp	NM_138302	RefSeq	Mus musculus thymidine phosphorylase (Tymp), mRNA.	FALSE	GO:0006206 // GO:0006213 // GO:0006935 // GO:0008152 // GO:0009887	pyrimidine base metabolic process // pyrimidine nucleoside metabolic process // chemotaxis // metabolic process // organ morphogenesis	---	---	GO:0004645 // GO:0009032 // GO:0016154 // GO:0016740 // GO:0016757 // GO:0016763	phosphorylase activity // thymidine phosphorylase activity // pyrimidine-nucleoside phosphorylase activity // transferase activity // transferase activity, transferring glycosyl groups // transferase activity, transferring pentosyl groups	---	---
10432636	0.588693	0.000936019	Smagp	NM_174992	RefSeq	Mus musculus small cell adhesion glycoprotein (Smagp), transcript variant 1, mRNA.	FALSE	GO:0008150	biological_process	GO:0005634 // GO:0005886 // GO:0016020 // GO:0016021 // GO:0030054 // GO:0031410	nucleus // plasma membrane // membrane // integral to membrane // cell junction // cytoplasmic vesicle	GO:0003674	molecular_function	---	---
10438098	0.867414	0.00444978	Sdf2l1	NM_022324	RefSeq	Mus musculus stromal cell-derived factor 2-like 1 (Sdf2l1), mRNA.	FALSE	GO:0008150	biological_process	GO:0005783 // GO:0016020	endoplasmic reticulum // membrane	GO:0003674	molecular_function	---	---
10438769	1.06099	2.43652e-05	Cldn1	NM_016674	RefSeq	Mus musculus claudin 1 (Cldn1), mRNA.	FALSE	GO:0016338 // GO:0045216	calcium-independent cell-cell adhesion // cell-cell junction organization	GO:0005886 // GO:0005923 // GO:0005923 // GO:0016020 // GO:0016021 // GO:0016328 // GO:0030054	plasma membrane // tight junction // tight junction // membrane // integral to membrane // lateral plasma membrane // cell junction	GO:0005198 // GO:0005515 // GO:0042802	structural molecule activity // protein binding // identical protein binding	---	---
10441003	1.07804	3.02957e-05	Runx1	NM_001111023	RefSeq	Mus musculus runt related transcription factor 1 (Runx1), transcript variant 3, mRNA.	FALSE	GO:0001501 // GO:0001701 // GO:0001889 // GO:0002318 // GO:0006351 // GO:0006355 // GO:0007417 // GO:0009966 // GO:0030097 // GO:0030097 // GO:0030099 // GO:0030182 // GO:0030853 // GO:0030854 // GO:0031069 // GO:0032526 // GO:0035162 // GO:0045766 // GO:0045893 // GO:0045944 // GO:0045944 // GO:0048266 // GO:0048666 // GO:0060216 // GO:0071336 // GO:2000872	skeletal system development // in utero embryonic development // liver development // myeloid progenitor cell differentiation // transcription, DNA-dependent // regulation of transcription, DNA-dependent // central nervous system development // regulation of signal transduction // hemopoiesis // hemopoiesis // myeloid cell differentiation // neuron differentiation // negative regulation of granul…	GO:0005604 // GO:0005634 // GO:0005634 // GO:0043231	basement membrane // nucleus // nucleus // intracellular membrane-bounded organelle	GO:0000975 // GO:0003677 // GO:0003677 // GO:0003700 // GO:0003700 // GO:0005509 // GO:0005515 // GO:0005524 // GO:0008134 // GO:0042803 // GO:0046982 // GO:0070491	regulatory region DNA binding // DNA binding // DNA binding // sequence-specific DNA binding transcription factor activity // sequence-specific DNA binding transcription factor activity // calcium ion binding // protein binding // ATP binding // transcription factor binding // protein homodimerization activity // protein heterodimerization activity // repressing transcription factor binding	---	---
10448803	0.612655	0.000176752	Hn1l	NM_198937	RefSeq	Mus musculus hematological and neurological expressed 1-like (Hn1l), mRNA.	FALSE	---	---	GO:0005634 // GO:0005737 // GO:0005886	nucleus // cytoplasm // plasma membrane	---	---	---	---
10450605	0.740695	9.27046e-05	Tubb5	NM_011655	RefSeq	Mus musculus tubulin, beta 5 class I (Tubb5), mRNA.	FALSE	GO:0006184 // GO:0007017 // GO:0007017 // GO:0007018 // GO:0009987 // GO:0051225 // GO:0051258	GTP catabolic process // microtubule-based process // microtubule-based process // microtubule-based movement // cellular process // spindle assembly // protein polymerization	GO:0005634 // GO:0005641 // GO:0005737 // GO:0005856 // GO:0005874 // GO:0005874 // GO:0043234 // GO:0044297 // GO:0045298	nucleus // nuclear envelope lumen // cytoplasm // cytoskeleton // microtubule // microtubule // protein complex // cell body // tubulin complex	GO:0000166 // GO:0003924 // GO:0005198 // GO:0005200 // GO:0005525 // GO:0032403 // GO:0042288	nucleotide binding // GTPase activity // structural molecule activity // structural constituent of cytoskeleton // GTP binding // protein complex binding // MHC class I protein binding	---	---
10450731	0.681819	0.00435836	---	GENSCAN00000032120	ENSEMBL	cdna:genscan chromosome:NCBIM37:17:36231272:36266360:-1 transcript_biotype:protein_coding	FALSE	---	---	---	---	---	---	---	---
10452000	0.761113	0.00172505	Dpp9	NM_172624	RefSeq	Mus musculus dipeptidylpeptidase 9 (Dpp9), mRNA.	FALSE	GO:0006508	proteolysis	GO:0005737 // GO:0016020	cytoplasm // membrane	GO:0003674 // GO:0004177 // GO:0008233 // GO:0008236 // GO:0016787	molecular_function // aminopeptidase activity // peptidase activity // serine-type peptidase activity // hydrolase activity	---	---
10454198	1.07675	0.000151934	Rnf125	NM_026301	RefSeq	Mus musculus ring finger protein 125 (Rnf125), mRNA.	FALSE	GO:0008150	biological_process	GO:0005575 // GO:0005622	cellular_component // intracellular	GO:0008270 // GO:0016874 // GO:0046872	zinc ion binding // ligase activity // metal ion binding	---	---
10456254	0.753073	5.8119e-05	Nedd4l	NM_001114386	RefSeq	Mus musculus neural precursor cell expressed, developmentally down-regulated gene 4-like (Nedd4l), transcript variant 1, mRNA.	FALSE	GO:0006464 // GO:0010038 // GO:0010766 // GO:0010766 // GO:0042787	cellular protein modification process // response to metal ion // negative regulation of sodium ion transport // negative regulation of sodium ion transport // protein ubiquitination involved in ubiquitin-dependent protein catabolic process	GO:0005622 // GO:0005634 // GO:0005737	intracellular // nucleus // cytoplasm	GO:0004842 // GO:0005515 // GO:0016874 // GO:0016881 // GO:0017080 // GO:0019871	ubiquitin-protein ligase activity // protein binding // ligase activity // acid-amino acid ligase activity // sodium channel regulator activity // sodium channel inhibitor activity	---	---
10457640	0.754047	0.000644535	S100a11	NM_016740	RefSeq	Mus musculus S100 calcium binding protein A11 (calgizzarin) (S100a11), mRNA.	FALSE	GO:0007283	spermatogenesis	GO:0001726 // GO:0005634 // GO:0005737 // GO:0005737	ruffle // nucleus // cytoplasm // cytoplasm	GO:0005509 // GO:0042803 // GO:0044548 // GO:0048306	calcium ion binding // protein homodimerization activity // S100 protein binding // calcium-dependent protein binding	---	---
10458534	0.590068	0.000720887	Pcdh1	NM_029357	RefSeq	Mus musculus protocadherin 1 (Pcdh1), mRNA.	FALSE	GO:0007155 // GO:0007156 // GO:0016339	cell adhesion // homophilic cell adhesion // calcium-dependent cell-cell adhesion	GO:0005886 // GO:0005887 // GO:0005911 // GO:0016020 // GO:0016021	plasma membrane // integral to plasma membrane // cell-cell junction // membrane // integral to membrane	GO:0005515	protein binding	---	---
10460221	1.65074	8.21003e-06	Chka	ENSMUST00000072055	ENSEMBL	cdna:known chromosome:NCBIM37:19:3851797:3894369:1 gene:ENSMUSG00000024843 gene_biotype:protein_coding transcript_biotype:protein_coding	FALSE	GO:0006646 // GO:0006656 // GO:0006656 // GO:0006657 // GO:0006657 // GO:0008654 // GO:0016310 // GO:0019695	phosphatidylethanolamine biosynthetic process // phosphatidylcholine biosynthetic process // phosphatidylcholine biosynthetic process // CDP-choline pathway // CDP-choline pathway // phospholipid biosynthetic process // phosphorylation // choline metabolic process	GO:0005737	cytoplasm	GO:0000166 // GO:0004103 // GO:0004103 // GO:0004104 // GO:0004305 // GO:0005524 // GO:0008144 // GO:0016301 // GO:0016740 // GO:0016772 // GO:0016773 // GO:0033265 // GO:0042803	nucleotide binding // choline kinase activity // choline kinase activity // cholinesterase activity // ethanolamine kinase activity // ATP binding // drug binding // kinase activity // transferase activity // transferase activity, transferring phosphorus-containing groups // phosphotransferase activity, alcohol group as acceptor // choline binding // protein homodimerization activity	---	---
10462195	0.659241	0.00404575	Kank1	NM_181404	RefSeq	Mus musculus KN motif and ankyrin repeat domains 1 (Kank1), mRNA.	FALSE	GO:0030837	negative regulation of actin filament polymerization	GO:0005737	cytoplasm	GO:0003674	molecular_function	---	---
10466304	1.10011	7.81281e-07	Dtx4	NM_172442	RefSeq	Mus musculus deltex 4 homolog (Drosophila) (Dtx4), mRNA.	FALSE	GO:0007219 // GO:0008150	Notch signaling pathway // biological_process	GO:0005575 // GO:0005737	cellular_component // cytoplasm	GO:0008270 // GO:0016874 // GO:0046872	zinc ion binding // ligase activity // metal ion binding	---	---
10466976	0.846189	8.40236e-05	Gldc	NM_138595	RefSeq	Mus musculus glycine decarboxylase (Gldc), nuclear gene encoding mitochondrial protein, mRNA.	FALSE	GO:0006520 // GO:0006544 // GO:0019464 // GO:0055114	cellular amino acid metabolic process // glycine metabolic process // glycine decarboxylation via glycine cleavage system // oxidation-reduction process	GO:0005739 // GO:0005739 // GO:0005960	mitochondrion // mitochondrion // glycine cleavage complex	GO:0003824 // GO:0004375 // GO:0016491 // GO:0016594 // GO:0016829 // GO:0019899 // GO:0030170 // GO:0042803 // GO:0046983	catalytic activity // glycine dehydrogenase (decarboxylating) activity // oxidoreductase activity // glycine binding // lyase activity // enzyme binding // pyridoxal phosphate binding // protein homodimerization activity // protein dimerization activity	---	---
10467206	1.06553	0.000540607	Ppp1r3c	ENSMUST00000087321	ENSEMBL	cdna:known chromosome:NCBIM37:19:36806227:36811143:-1 gene:ENSMUSG00000067279 gene_biotype:protein_coding transcript_biotype:protein_coding	FALSE	GO:0005975 // GO:0005977 // GO:0005978 // GO:0005979 // GO:0005981 // GO:0006605	carbohydrate metabolic process // glycogen metabolic process // glycogen biosynthetic process // regulation of glycogen biosynthetic process // regulation of glycogen catabolic process // protein targeting	GO:0005625 // GO:0005792 // GO:0042587	soluble fraction // microsome // glycogen granule	GO:0004721 // GO:0019899 // GO:0019903	phosphoprotein phosphatase activity // enzyme binding // protein phosphatase binding	---	---
10469110	0.674232	0.00140624	Usp6nl	NM_181399	RefSeq	Mus musculus USP6 N-terminal like (Usp6nl), transcript variant 1, mRNA.	FALSE	GO:0008150 // GO:0032313	biological_process // regulation of Rab GTPase activity	GO:0005575 // GO:0005622	cellular_component // intracellular	GO:0003674 // GO:0005096 // GO:0005097	molecular_function // GTPase activator activity // Rab GTPase activator activity	---	---
10471912	0.59325	0.0033502	Kynu	NM_027552	RefSeq	Mus musculus kynureninase (L-kynurenine hydrolase) (Kynu), mRNA.	FALSE	GO:0006569 // GO:0008152 // GO:0009435 // GO:0019363 // GO:0019441 // GO:0019442 // GO:0019805 // GO:0034341 // GO:0034516 // GO:0043420	tryptophan catabolic process // metabolic process // NAD biosynthetic process // pyridine nucleotide biosynthetic process // tryptophan catabolic process to kynurenine // tryptophan catabolic process to acetyl-CoA // quinolinate biosynthetic process // response to interferon-gamma // response to vitamin B6 // anthranilate metabolic process	GO:0005625 // GO:0005737 // GO:0005739 // GO:0005739 // GO:0005829	soluble fraction // cytoplasm // mitochondrion // mitochondrion // cytosol	GO:0003824 // GO:0016787 // GO:0030170 // GO:0030429 // GO:0042803	catalytic activity // hydrolase activity // pyridoxal phosphate binding // kynureninase activity // protein homodimerization activity	---	---
10472538	1.44955	0.00455284	Dhrs9	NM_175512	RefSeq	Mus musculus dehydrogenase/reductase (SDR family) member 9 (Dhrs9), mRNA.	FALSE	GO:0008152 // GO:0008209 // GO:0042448 // GO:0042904 // GO:0055114	metabolic process // androgen metabolic process // progesterone metabolic process // 9-cis-retinoic acid biosynthetic process // oxidation-reduction process	GO:0005737 // GO:0005783 // GO:0005792 // GO:0016020 // GO:0030176	cytoplasm // endoplasmic reticulum // microsome // membrane // integral to endoplasmic reticulum membrane	GO:0000166 // GO:0004022 // GO:0004745 // GO:0016491 // GO:0047035	nucleotide binding // alcohol dehydrogenase (NAD) activity // retinol dehydrogenase activity // oxidoreductase activity // testosterone dehydrogenase (NAD+) activity	---	---
10474181	0.747609	0.000399189	Abtb2	NM_178890	RefSeq	Mus musculus ankyrin repeat and BTB (POZ) domain containing 2 (Abtb2), mRNA.	FALSE	GO:0008150	biological_process	GO:0005575	cellular_component	GO:0003674 // GO:0003677	molecular_function // DNA binding	---	---
10477325	0.774495	0.0002484	Dnmt3b	NM_001003961	RefSeq	Mus musculus DNA methyltransferase 3B (Dnmt3b), transcript variant 1, mRNA.	FALSE	GO:0000122 // GO:0006306 // GO:0006346 // GO:0006349 // GO:0010424 // GO:0010628 // GO:0031503 // GO:0032259 // GO:0045666 // GO:0045814 // GO:0045892 // GO:0046498 // GO:0046499 // GO:0051571 // GO:0051573 // GO:0071230 // GO:0090116 // GO:0090116 // GO:0090116	negative regulation of transcription from RNA polymerase II promoter // DNA methylation // methylation-dependent chromatin silencing // regulation of gene expression by genetic imprinting // DNA methylation on cytosine within a CG sequence // positive regulation of gene expression // protein complex localization // methylation // positive regulation of neuron differentiation // negative regulatio…	GO:0000775 // GO:0000792 // GO:0005634 // GO:0005634 // GO:0005720 // GO:0005737 // GO:0043231	chromosome, centromeric region // heterochromatin // nucleus // nucleus // nuclear heterochromatin // cytoplasm // intracellular membrane-bounded organelle	GO:0003677 // GO:0003714 // GO:0003886 // GO:0003886 // GO:0003886 // GO:0005515 // GO:0008168 // GO:0016740 // GO:0045322 // GO:0046872 // GO:0051718	DNA binding // transcription corepressor activity // DNA (cytosine-5-)-methyltransferase activity // DNA (cytosine-5-)-methyltransferase activity // DNA (cytosine-5-)-methyltransferase activity // protein binding // methyltransferase activity // transferase activity // unmethylated CpG binding // metal ion binding // DNA (cytosine-5-)-methyltransferase activity, acting on CpG substrates	---	---
10477572	0.675181	0.00157934	Chmp4b	NM_029362	RefSeq	Mus musculus charged multivesicular body protein 4B (Chmp4b), mRNA.	FALSE	GO:0006810 // GO:0015031	transport // protein transport	GO:0005737 // GO:0005768 // GO:0016020	cytoplasm // endosome // membrane	---	---	---	---
10479154	0.841093	0.000196587	Tubb1	NM_001080971	RefSeq	Mus musculus tubulin, beta 1 class VI (Tubb1), mRNA.	FALSE	GO:0006184 // GO:0007017 // GO:0007018 // GO:0051225 // GO:0051258	GTP catabolic process // microtubule-based process // microtubule-based movement // spindle assembly // protein polymerization	GO:0005737 // GO:0005856 // GO:0005874 // GO:0043234	cytoplasm // cytoskeleton // microtubule // protein complex	GO:0000166 // GO:0003924 // GO:0005198 // GO:0005200 // GO:0005525	nucleotide binding // GTPase activity // structural molecule activity // structural constituent of cytoskeleton // GTP binding	---	---
10480628	0.673899	0.00288897	Tubb4b	NM_146116	RefSeq	Mus musculus tubulin, beta 4B class IVB (Tubb4b), mRNA.	FALSE	GO:0006184 // GO:0007017 // GO:0007018 // GO:0051258	GTP catabolic process // microtubule-based process // microtubule-based movement // protein polymerization	GO:0005737 // GO:0005856 // GO:0005874 // GO:0043234 // GO:0045298	cytoplasm // cytoskeleton // microtubule // protein complex // tubulin complex	GO:0000166 // GO:0003924 // GO:0005198 // GO:0005525	nucleotide binding // GTPase activity // structural molecule activity // GTP binding	---	---
10483163	0.663715	0.00195205	Grb14	NM_016719	RefSeq	Mus musculus growth factor receptor bound protein 14 (Grb14), mRNA.	FALSE	GO:0007165 // GO:0008286 // GO:0046627	signal transduction // insulin receptor signaling pathway // negative regulation of insulin receptor signaling pathway	GO:0005737 // GO:0005768 // GO:0005792 // GO:0005794 // GO:0005886 // GO:0016020	cytoplasm // endosome // microsome // Golgi apparatus // plasma membrane // membrane	GO:0004872 // GO:0005070 // GO:0005543 // GO:0051219	receptor activity // SH3/SH2 adaptor activity // phospholipid binding // phosphoprotein binding	---	---
10485514	0.608387	0.00204162	Caprin1	NM_016739	RefSeq	Mus musculus cell cycle associated protein 1 (Caprin1), transcript variant 1, mRNA.	FALSE	GO:0017148 // GO:0030154 // GO:0050775 // GO:0061003	negative regulation of translation // cell differentiation // positive regulation of dendrite morphogenesis // positive regulation of dendritic spine morphogenesis	GO:0000932 // GO:0005737 // GO:0010494 // GO:0010494 // GO:0042995	cytoplasmic mRNA processing body // cytoplasm // cytoplasmic stress granule // cytoplasmic stress granule // cell projection	GO:0003723	RNA binding	---	---
10487040	0.632449	0.00291948	Fbn1	ENSMUST00000103234	ENSEMBL	cdna:known chromosome:NCBIM37:2:125126363:125333729:-1 gene:ENSMUSG00000027204 gene_biotype:protein_coding transcript_biotype:protein_coding	FALSE	GO:0001501 // GO:0001822 // GO:0007507	skeletal system development // kidney development // heart development	GO:0001527 // GO:0001527 // GO:0005578 // GO:0005604 // GO:0005615 // GO:0031012 // GO:0031012	microfibril // microfibril // proteinaceous extracellular matrix // basement membrane // extracellular space // extracellular matrix // extracellular matrix	GO:0005201 // GO:0005509 // GO:0005515	extracellular matrix structural constituent // calcium ion binding // protein binding	---	---
10488589	0.724612	0.00352296	Fam110a	NM_028666	RefSeq	Mus musculus family with sequence similarity 110, member A (Fam110a), transcript variant 1, mRNA.	FALSE	GO:0008150	biological_process	GO:0005575 // GO:0005737 // GO:0005856	cellular_component // cytoplasm // cytoskeleton	GO:0003674	molecular_function	---	---
10489190	0.590944	0.000403781	Blcap	ENSMUST00000088494	ENSEMBL	cdna:known chromosome:NCBIM37:2:157382098:157392097:-1 gene:ENSMUSG00000067787 gene_biotype:protein_coding transcript_biotype:protein_coding	FALSE	GO:0006915 // GO:0007049	apoptotic process // cell cycle	GO:0016020 // GO:0016021	membrane // integral to membrane	---	---	---	---
10491564	0.767329	2.84626e-05	4932438A13Rik	NM_172679	RefSeq	Mus musculus RIKEN cDNA 4932438A13 gene (4932438A13Rik), mRNA.	FALSE	GO:0001558 // GO:0006629 // GO:0007283 // GO:0009235 // GO:0019915 // GO:0045444 // GO:0051647 // GO:0060612	regulation of cell growth // lipid metabolic process // spermatogenesis // cobalamin metabolic process // lipid storage // fat cell differentiation // nucleus localization // adipose tissue development	GO:0005634 // GO:0005739 // GO:0016020 // GO:0016021	nucleus // mitochondrion // membrane // integral to membrane	GO:0003674	molecular_function	---	---
10491595	0.828628	2.81917e-05	---	---	---	---	---	---	---	---	---	---	---	---	---
10491597	0.645799	0.00131587	4932438A13Rik	NM_172679	RefSeq	Mus musculus RIKEN cDNA 4932438A13 gene (4932438A13Rik), mRNA.	FALSE	GO:0001558 // GO:0006629 // GO:0007283 // GO:0009235 // GO:0019915 // GO:0045444 // GO:0051647 // GO:0060612	regulation of cell growth // lipid metabolic process // spermatogenesis // cobalamin metabolic process // lipid storage // fat cell differentiation // nucleus localization // adipose tissue development	GO:0005634 // GO:0005739 // GO:0016020 // GO:0016021	nucleus // mitochondrion // membrane // integral to membrane	GO:0003674	molecular_function	---	---
10491603	0.679272	0.000266805	---	GENSCAN00000041066	ENSEMBL	cdna:genscan chromosome:NCBIM37:3:36772701:36907405:1 transcript_biotype:protein_coding	FALSE	---	---	---	---	---	---	---	---
10491605	0.72518	9.80256e-05	4932438A13Rik	NM_172679	RefSeq	Mus musculus RIKEN cDNA 4932438A13 gene (4932438A13Rik), mRNA.	FALSE	GO:0001558 // GO:0006629 // GO:0007283 // GO:0009235 // GO:0019915 // GO:0045444 // GO:0051647 // GO:0060612	regulation of cell growth // lipid metabolic process // spermatogenesis // cobalamin metabolic process // lipid storage // fat cell differentiation // nucleus localization // adipose tissue development	GO:0005634 // GO:0005739 // GO:0016020 // GO:0016021	nucleus // mitochondrion // membrane // integral to membrane	GO:0003674	molecular_function	---	---
10491607	0.68348	0.00158421	4932438A13Rik	NM_172679	RefSeq	Mus musculus RIKEN cDNA 4932438A13 gene (4932438A13Rik), mRNA.	FALSE	GO:0001558 // GO:0006629 // GO:0007283 // GO:0009235 // GO:0019915 // GO:0045444 // GO:0051647 // GO:0060612	regulation of cell growth // lipid metabolic process // spermatogenesis // cobalamin metabolic process // lipid storage // fat cell differentiation // nucleus localization // adipose tissue development	GO:0005634 // GO:0005739 // GO:0016020 // GO:0016021	nucleus // mitochondrion // membrane // integral to membrane	GO:0003674	molecular_function	---	---
10491609	0.764356	3.52079e-05	4932438A13Rik	NM_172679	RefSeq	Mus musculus RIKEN cDNA 4932438A13 gene (4932438A13Rik), mRNA.	FALSE	GO:0001558 // GO:0006629 // GO:0007283 // GO:0009235 // GO:0019915 // GO:0045444 // GO:0051647 // GO:0060612	regulation of cell growth // lipid metabolic process // spermatogenesis // cobalamin metabolic process // lipid storage // fat cell differentiation // nucleus localization // adipose tissue development	GO:0005634 // GO:0005739 // GO:0016020 // GO:0016021	nucleus // mitochondrion // membrane // integral to membrane	GO:0003674	molecular_function	---	---
10491613	0.617522	0.000735011	---	---	---	---	---	---	---	---	---	---	---	---	---
10491617	0.684497	3.80743e-05	4932438A13Rik	NM_172679	RefSeq	Mus musculus RIKEN cDNA 4932438A13 gene (4932438A13Rik), mRNA.	FALSE	GO:0001558 // GO:0006629 // GO:0007283 // GO:0009235 // GO:0019915 // GO:0045444 // GO:0051647 // GO:0060612	regulation of cell growth // lipid metabolic process // spermatogenesis // cobalamin metabolic process // lipid storage // fat cell differentiation // nucleus localization // adipose tissue development	GO:0005634 // GO:0005739 // GO:0016020 // GO:0016021	nucleus // mitochondrion // membrane // integral to membrane	GO:0003674	molecular_function	---	---
10491619	0.639493	0.000590933	---	GENSCAN00000041066	ENSEMBL	cdna:genscan chromosome:NCBIM37:3:36772701:36907405:1 transcript_biotype:protein_coding	FALSE	---	---	---	---	---	---	---	---
10491621	0.746323	0.000111384	4932438A13Rik	NM_172679	RefSeq	Mus musculus RIKEN cDNA 4932438A13 gene (4932438A13Rik), mRNA.	FALSE	GO:0001558 // GO:0006629 // GO:0007283 // GO:0009235 // GO:0019915 // GO:0045444 // GO:0051647 // GO:0060612	regulation of cell growth // lipid metabolic process // spermatogenesis // cobalamin metabolic process // lipid storage // fat cell differentiation // nucleus localization // adipose tissue development	GO:0005634 // GO:0005739 // GO:0016020 // GO:0016021	nucleus // mitochondrion // membrane // integral to membrane	GO:0003674	molecular_function	---	---
10491623	0.646447	0.000148334	4932438A13Rik	NM_172679	RefSeq	Mus musculus RIKEN cDNA 4932438A13 gene (4932438A13Rik), mRNA.	FALSE	GO:0001558 // GO:0006629 // GO:0007283 // GO:0009235 // GO:0019915 // GO:0045444 // GO:0051647 // GO:0060612	regulation of cell growth // lipid metabolic process // spermatogenesis // cobalamin metabolic process // lipid storage // fat cell differentiation // nucleus localization // adipose tissue development	GO:0005634 // GO:0005739 // GO:0016020 // GO:0016021	nucleus // mitochondrion // membrane // integral to membrane	GO:0003674	molecular_function	---	---
10491627	0.679964	0.00035804	4932438A13Rik	NM_172679	RefSeq	Mus musculus RIKEN cDNA 4932438A13 gene (4932438A13Rik), mRNA.	FALSE	GO:0001558 // GO:0006629 // GO:0007283 // GO:0009235 // GO:0019915 // GO:0045444 // GO:0051647 // GO:0060612	regulation of cell growth // lipid metabolic process // spermatogenesis // cobalamin metabolic process // lipid storage // fat cell differentiation // nucleus localization // adipose tissue development	GO:0005634 // GO:0005739 // GO:0016020 // GO:0016021	nucleus // mitochondrion // membrane // integral to membrane	GO:0003674	molecular_function	---	---
10491629	0.756871	0.000150912	4932438A13Rik	NM_172679	RefSeq	Mus musculus RIKEN cDNA 4932438A13 gene (4932438A13Rik), mRNA.	FALSE	GO:0001558 // GO:0006629 // GO:0007283 // GO:0009235 // GO:0019915 // GO:0045444 // GO:0051647 // GO:0060612	regulation of cell growth // lipid metabolic process // spermatogenesis // cobalamin metabolic process // lipid storage // fat cell differentiation // nucleus localization // adipose tissue development	GO:0005634 // GO:0005739 // GO:0016020 // GO:0016021	nucleus // mitochondrion // membrane // integral to membrane	GO:0003674	molecular_function	---	---
10492689	1.01336	0.0033158	Pdgfc	NM_019971	RefSeq	Mus musculus platelet-derived growth factor, C polypeptide (Pdgfc), mRNA.	FALSE	GO:0007171 // GO:0007275 // GO:0008284 // GO:0009887 // GO:0009887 // GO:0045740 // GO:0048008 // GO:0048008 // GO:0048146 // GO:0050730 // GO:0051781 // GO:0071230	activation of transmembrane receptor protein tyrosine kinase activity // multicellular organismal development // positive regulation of cell proliferation // organ morphogenesis // organ morphogenesis // positive regulation of DNA replication // platelet-derived growth factor receptor signaling pathway // platelet-derived growth factor receptor signaling pathway // positive regulation of fibrobla…	GO:0005576 // GO:0005615 // GO:0005634 // GO:0005737 // GO:0016020	extracellular region // extracellular space // nucleus // cytoplasm // membrane	GO:0005161 // GO:0005161 // GO:0008083 // GO:0042803 // GO:0043498	platelet-derived growth factor receptor binding // platelet-derived growth factor receptor binding // growth factor activity // protein homodimerization activity // cell surface binding	---	---
10493494	1.05869	0.00300048	---	---	---	---	---	---	---	---	---	---	---	---	---
10493770	0.675587	0.000955233	Ilf2	NM_026374	RefSeq	Mus musculus interleukin enhancer binding factor 2 (Ilf2), mRNA.	FALSE	GO:0006351 // GO:0006355 // GO:0006955 // GO:0045893	transcription, DNA-dependent // regulation of transcription, DNA-dependent // immune response // positive regulation of transcription, DNA-dependent	GO:0005634 // GO:0005634 // GO:0005730 // GO:0005730 // GO:0005737 // GO:0030529	nucleus // nucleus // nucleolus // nucleolus // cytoplasm // ribonucleoprotein complex	GO:0003677 // GO:0003723 // GO:0003725 // GO:0005524 // GO:0016740	DNA binding // RNA binding // double-stranded RNA binding // ATP binding // transferase activity	---	---
10493990	0.762667	0.000900881	S100a11	NM_016740	RefSeq	Mus musculus S100 calcium binding protein A11 (calgizzarin) (S100a11), mRNA.	FALSE	GO:0007283	spermatogenesis	GO:0001726 // GO:0005634 // GO:0005737 // GO:0005737	ruffle // nucleus // cytoplasm // cytoplasm	GO:0005509 // GO:0042803 // GO:0044548 // GO:0048306	calcium ion binding // protein homodimerization activity // S100 protein binding // calcium-dependent protein binding	---	---
10495035	0.83795	0.00208761	Slc16a1	NM_009196	RefSeq	Mus musculus solute carrier family 16 (monocarboxylic acid transporters), member 1 (Slc16a1), mRNA.	FALSE	GO:0006810 // GO:0015711 // GO:0055085	transport // organic anion transport // transmembrane transport	GO:0005739 // GO:0005886 // GO:0016020 // GO:0016021	mitochondrion // plasma membrane // membrane // integral to membrane	GO:0015293 // GO:0015355	symporter activity // secondary active monocarboxylate transmembrane transporter activity	---	---
10497761	1.31972	0.000477773	Gm6639	NR_040748	RefSeq	Mus musculus predicted gene 6639 (Gm6639), non-coding RNA.	FALSE	GO:0008150	biological_process	GO:0005575	cellular_component	GO:0003674	molecular_function	---	---
10499045	0.679874	0.00247115	Trim2	ENSMUST00000107691	ENSEMBL	cdna:known chromosome:NCBIM37:3:83964362:84063734:-1 gene:ENSMUSG00000027993 gene_biotype:protein_coding transcript_biotype:protein_coding	FALSE	GO:0008152 // GO:0016567 // GO:0043526 // GO:0043526	metabolic process // protein ubiquitination // neuroprotection // neuroprotection	GO:0005622 // GO:0005737 // GO:0005737	intracellular // cytoplasm // cytoplasm	GO:0004842 // GO:0005515 // GO:0008270 // GO:0016874 // GO:0017022 // GO:0046872	ubiquitin-protein ligase activity // protein binding // zinc ion binding // ligase activity // myosin binding // metal ion binding	---	---
10499095	0.929505	0.00364694	Fam160a1	NM_172682	RefSeq	Mus musculus family with sequence similarity 160, member A1 (Fam160a1), mRNA.	FALSE	GO:0008150	biological_process	GO:0005575	cellular_component	GO:0003674	molecular_function	---	---
10500011	0.980432	0.00485497	Tuft1	NM_011656	RefSeq	Mus musculus tuftelin 1 (Tuft1), mRNA.	FALSE	GO:0031214	biomineral tissue development	GO:0005576 // GO:0005737	extracellular region // cytoplasm	GO:0005515	protein binding	---	---
10504072	2.59619	0.00102035	Dnaic1	NM_175138	RefSeq	Mus musculus dynein, axonemal, intermediate chain 1 (Dnaic1), mRNA.	FALSE	GO:0003351	epithelial cilium movement	GO:0005737 // GO:0005856 // GO:0005874 // GO:0005929 // GO:0030286 // GO:0042995	cytoplasm // cytoskeleton // microtubule // cilium // dynein complex // cell projection	GO:0003774	motor activity	---	---
10504582	0.798861	0.00191822	1300002K09Rik	ENSMUST00000107783	ENSEMBL	cdna:known chromosome:NCBIM37:4:45861536:45899880:1 gene:ENSMUSG00000028327 gene_biotype:protein_coding transcript_biotype:protein_coding	FALSE	GO:0008150	biological_process	GO:0005575	cellular_component	GO:0003674	molecular_function	---	---
10506433	0.85196	0.00328456	Dab1	ENSMUST00000080139	ENSEMBL	cdna:known chromosome:NCBIM37:4:104040176:104417447:1 gene:ENSMUSG00000028519 gene_biotype:protein_coding transcript_biotype:protein_coding	FALSE	GO:0001764 // GO:0001764 // GO:0001764 // GO:0007162 // GO:0007243 // GO:0007264 // GO:0007275 // GO:0007399 // GO:0007417 // GO:0007628 // GO:0016358 // GO:0016358 // GO:0021589 // GO:0021795 // GO:0021799 // GO:0021799 // GO:0021813 // GO:0021942 // GO:0030154 // GO:0045666 // GO:0045860 // GO:0046426 // GO:0048712 // GO:0050771 // GO:0050771 // GO:0051645	neuron migration // neuron migration // neuron migration // negative regulation of cell adhesion // intracellular protein kinase cascade // small GTPase mediated signal transduction // multicellular organismal development // nervous system development // central nervous system development // adult walking behavior // dendrite development // dendrite development // cerebellum structural organizati…	GO:0005622 // GO:0005624 // GO:0005829 // GO:0005903 // GO:0014069 // GO:0043005 // GO:0043025 // GO:0045177 // GO:0048471	intracellular // membrane fraction // cytosol // brush border // postsynaptic density // neuron projection // neuronal cell body // apical part of cell // perinuclear region of cytoplasm	GO:0005515 // GO:0005543 // GO:0042169 // GO:0043548	protein binding // phospholipid binding // SH2 domain binding // phosphatidylinositol 3-kinase binding	---	---
10510270	0.836786	0.000645814	Mthfr	NM_001161798	RefSeq	Mus musculus 5,10-methylenetetrahydrofolate reductase (Mthfr), transcript variant 1, mRNA.	FALSE	GO:0006555 // GO:0008152 // GO:0009086 // GO:0046653 // GO:0050667 // GO:0055114 // GO:0055114	methionine metabolic process // metabolic process // methionine biosynthetic process // tetrahydrofolate metabolic process // homocysteine metabolic process // oxidation-reduction process // oxidation-reduction process	GO:0005625	soluble fraction	GO:0003824 // GO:0004489 // GO:0004489 // GO:0016491 // GO:0050660 // GO:0050661 // GO:0072341	catalytic activity // methylenetetrahydrofolate reductase (NADPH) activity // methylenetetrahydrofolate reductase (NADPH) activity // oxidoreductase activity // flavin adenine dinucleotide binding // NADP binding // modified amino acid binding	---	---
10510286	0.964283	8.06603e-05	Mad2l2	NM_027985	RefSeq	Mus musculus MAD2 mitotic arrest deficient-like 2 (Mad2l2), mRNA.	FALSE	GO:0001558 // GO:0006302 // GO:0006351 // GO:0006355 // GO:0006974 // GO:0007049 // GO:0007067 // GO:0033138 // GO:0042177 // GO:0042772 // GO:0045893 // GO:0051301 // GO:0060564	regulation of cell growth // double-strand break repair // transcription, DNA-dependent // regulation of transcription, DNA-dependent // response to DNA damage stimulus // cell cycle // mitosis // positive regulation of peptidyl-serine phosphorylation // negative regulation of protein catabolic process // DNA damage response, signal transduction resulting in transcription // positive regulation o…	GO:0005634 // GO:0005737 // GO:0005819 // GO:0005856 // GO:0016035	nucleus // cytoplasm // spindle // cytoskeleton // zeta DNA polymerase complex	GO:0008432	JUN kinase binding	GenMAPP	Cell_Cycle_KEGG
10511935	0.717935	4.59253e-05	Pnrc1	NM_001033225	RefSeq	Mus musculus proline-rich nuclear receptor coactivator 1 (Pnrc1), mRNA.	FALSE	GO:0008150	biological_process	GO:0005575	cellular_component	GO:0003674 // GO:0004872	molecular_function // receptor activity	---	---
10513190	0.761123	0.000761371	D630039A03Rik	BC095953	GenBank	Mus musculus RIKEN cDNA D630039A03 gene, mRNA (cDNA clone MGC:106277 IMAGE:5043405), complete cds.	FALSE	GO:0008150	biological_process	GO:0005575	cellular_component	GO:0003674	molecular_function	---	---
10515590	0.602247	0.00116398	Kdm4a	NM_001161823	RefSeq	Mus musculus lysine (K)-specific demethylase 4A (Kdm4a), transcript variant 1, mRNA.	FALSE	GO:0006351 // GO:0006355 // GO:0016568 // GO:0016577 // GO:0045892 // GO:0055114 // GO:0070544	transcription, DNA-dependent // regulation of transcription, DNA-dependent // chromatin modification // histone demethylation // negative regulation of transcription, DNA-dependent // oxidation-reduction process // histone H3-K36 demethylation	GO:0005634 // GO:0005730 // GO:0005737 // GO:0005813	nucleus // nucleolus // cytoplasm // centrosome	GO:0008270 // GO:0016491 // GO:0016702 // GO:0046872 // GO:0051864	zinc ion binding // oxidoreductase activity // oxidoreductase activity, acting on single donors with incorporation of molecular oxygen, incorporation of two atoms of oxygen // metal ion binding // histone demethylase activity (H3-K36 specific)	---	---
10519488	0.702764	0.000782308	Tubb4b	NM_146116	RefSeq	Mus musculus tubulin, beta 4B class IVB (Tubb4b), mRNA.	FALSE	GO:0006184 // GO:0007017 // GO:0007018 // GO:0051258	GTP catabolic process // microtubule-based process // microtubule-based movement // protein polymerization	GO:0005737 // GO:0005856 // GO:0005874 // GO:0043234 // GO:0045298	cytoplasm // cytoskeleton // microtubule // protein complex // tubulin complex	GO:0000166 // GO:0003924 // GO:0005198 // GO:0005525	nucleotide binding // GTPase activity // structural molecule activity // GTP binding	---	---
10520483	0.628893	0.00331719	Ept1	NM_027652	RefSeq	Mus musculus ethanolaminephosphotransferase 1 (CDP-ethanolamine-specific) (Ept1), mRNA.	FALSE	GO:0008150 // GO:0008654	biological_process // phospholipid biosynthetic process	GO:0005575 // GO:0016020 // GO:0016021	cellular_component // membrane // integral to membrane	GO:0003674 // GO:0004307 // GO:0016740 // GO:0016780 // GO:0046872	molecular_function // ethanolaminephosphotransferase activity // transferase activity // phosphotransferase activity, for other substituted phosphate groups // metal ion binding	---	---
10521892	1.67535	0.00483487	Slc34a2	NM_011402	RefSeq	Mus musculus solute carrier family 34 (sodium phosphate), member 2 (Slc34a2), mRNA.	FALSE	GO:0001701 // GO:0006810 // GO:0006811 // GO:0006814 // GO:0006817 // GO:0006817 // GO:0006817 // GO:0030643 // GO:0035435 // GO:0044341	in utero embryonic development // transport // ion transport // sodium ion transport // phosphate ion transport // phosphate ion transport // phosphate ion transport // cellular phosphate ion homeostasis // phosphate ion transmembrane transport // sodium-dependent phosphate transport	GO:0005903 // GO:0016020 // GO:0016021 // GO:0016324 // GO:0016324 // GO:0031526	brush border // membrane // integral to membrane // apical plasma membrane // apical plasma membrane // brush border membrane	GO:0005436 // GO:0015293 // GO:0015321 // GO:0015321 // GO:0031402 // GO:0042301	sodium:phosphate symporter activity // symporter activity // sodium-dependent phosphate transmembrane transporter activity // sodium-dependent phosphate transmembrane transporter activity // sodium ion binding // phosphate ion binding	---	---
10523579	0.677624	0.00105794	Arhgap24	NM_029270	RefSeq	Mus musculus Rho GTPase activating protein 24 (Arhgap24), transcript variant 1, mRNA.	FALSE	GO:0001525 // GO:0007165 // GO:0007275 // GO:0030154	angiogenesis // signal transduction // multicellular organismal development // cell differentiation	GO:0005622 // GO:0005737 // GO:0005856 // GO:0005886 // GO:0030054 // GO:0042995	intracellular // cytoplasm // cytoskeleton // plasma membrane // cell junction // cell projection	GO:0003674 // GO:0005096 // GO:0005543	molecular_function // GTPase activator activity // phospholipid binding	---	---
10523647	0.644319	0.000674008	Aff1	NM_001080798	RefSeq	Mus musculus AF4/FMR2 family, member 1 (Aff1), transcript variant 1, mRNA.	FALSE	GO:0006351 // GO:0006355 // GO:0045893	transcription, DNA-dependent // regulation of transcription, DNA-dependent // positive regulation of transcription, DNA-dependent	GO:0005634	nucleus	GO:0003700	sequence-specific DNA binding transcription factor activity	---	---
10523717	0.803463	0.000134998	Spp1	NM_001204233	RefSeq	Mus musculus secreted phosphoprotein 1 (Spp1), transcript variant 5, mRNA.	FALSE	GO:0001503 // GO:0001649 // GO:0006916 // GO:0007155 // GO:0010033 // GO:0010811 // GO:0030593 // GO:0030593 // GO:0031214 // GO:0033280 // GO:0045780 // GO:0048545	ossification // osteoblast differentiation // anti-apoptosis // cell adhesion // response to organic substance // positive regulation of cell-substrate adhesion // neutrophil chemotaxis // neutrophil chemotaxis // biomineral tissue development // response to vitamin D // positive regulation of bone resorption // response to steroid hormone stimulus	GO:0005576 // GO:0005615 // GO:0005737 // GO:0031988 // GO:0042995 // GO:0045177 // GO:0048471	extracellular region // extracellular space // cytoplasm // membrane-bounded vesicle // cell projection // apical part of cell // perinuclear region of cytoplasm	GO:0005125 // GO:0050840	cytokine activity // extracellular matrix binding	---	---
10527694	0.753405	0.00120624	B3galtl	NM_001081204	RefSeq	Mus musculus beta 1,3-galactosyltransferase-like (B3galtl), mRNA.	FALSE	GO:0005975 // GO:0006004 // GO:0008150	carbohydrate metabolic process // fucose metabolic process // biological_process	GO:0005575 // GO:0005783 // GO:0016020 // GO:0016021	cellular_component // endoplasmic reticulum // membrane // integral to membrane	GO:0003674 // GO:0016740 // GO:0016757	molecular_function // transferase activity // transferase activity, transferring glycosyl groups	---	---
10529264	0.988133	0.0024564	Spon2	NM_133903	RefSeq	Mus musculus spondin 2, extracellular matrix protein (Spon2), mRNA.	FALSE	GO:0007155 // GO:0045087	cell adhesion // innate immune response	GO:0005576 // GO:0005578	extracellular region // proteinaceous extracellular matrix	GO:0046872	metal ion binding	---	---
10530733	1.37248	1.82683e-05	Clock	NM_007715	RefSeq	Mus musculus circadian locomotor output cycles kaput (Clock), mRNA.	FALSE	GO:0000077 // GO:0006351 // GO:0006355 // GO:0006355 // GO:0006974 // GO:0007165 // GO:0007623 // GO:0007623 // GO:0032922 // GO:0045944 // GO:0045944 // GO:0045944 // GO:0045944 // GO:0048511 // GO:0071479	DNA damage checkpoint // transcription, DNA-dependent // regulation of transcription, DNA-dependent // regulation of transcription, DNA-dependent // response to DNA damage stimulus // signal transduction // circadian rhythm // circadian rhythm // circadian regulation of gene expression // positive regulation of transcription from RNA polymerase II promoter // positive regulation of transcription …	GO:0005634 // GO:0005634 // GO:0005667 // GO:0005667 // GO:0005694 // GO:0005737 // GO:0043231	nucleus // nucleus // transcription factor complex // transcription factor complex // chromosome // cytoplasm // intracellular membrane-bounded organelle	GO:0000978 // GO:0000982 // GO:0001077 // GO:0001190 // GO:0003677 // GO:0003700 // GO:0003700 // GO:0004402 // GO:0004871 // GO:0005515 // GO:0008134 // GO:0016740 // GO:0016746 // GO:0070888	RNA polymerase II core promoter proximal region sequence-specific DNA binding // RNA polymerase II core promoter proximal region sequence-specific DNA binding transcription factor activity // RNA polymerase II core promoter proximal region sequence-specific DNA binding transcription factor activity involved in positive regulation of transcription // RNA polymerase II transcription factor binding …	GenMAPP	Circadian_Exercise
10531794	0.595009	0.00473694	Wdfy3	NM_172882	RefSeq	Mus musculus WD repeat and FYVE domain containing 3 (Wdfy3), mRNA.	FALSE	GO:0008152	metabolic process	GO:0005635 // GO:0005737 // GO:0005776 // GO:0016020 // GO:0019898 // GO:0044444	nuclear envelope // cytoplasm // autophagic vacuole // membrane // extrinsic to membrane // cytoplasmic part	GO:0003831 // GO:0005545 // GO:0046872	beta-N-acetylglucosaminylglycopeptide beta-1,4-galactosyltransferase activity // 1-phosphatidylinositol binding // metal ion binding	---	---
10535759	0.688609	0.00298601	Lnx2	NM_080795	RefSeq	Mus musculus ligand of numb-protein X 2 (Lnx2), mRNA.	FALSE	GO:0051260	protein homooligomerization	GO:0005575	cellular_component	GO:0005515 // GO:0008270 // GO:0030165 // GO:0046872	protein binding // zinc ion binding // PDZ domain binding // metal ion binding	---	---
10536898	0.800946	0.00388629	Irf5	NM_012057	RefSeq	Mus musculus interferon regulatory factor 5 (Irf5), transcript variant 2, mRNA.	FALSE	GO:0006351 // GO:0006355 // GO:0009615 // GO:0045087 // GO:0051607	transcription, DNA-dependent // regulation of transcription, DNA-dependent // response to virus // innate immune response // defense response to virus	GO:0005634 // GO:0005737	nucleus // cytoplasm	GO:0000975 // GO:0003677 // GO:0003700 // GO:0005515	regulatory region DNA binding // DNA binding // sequence-specific DNA binding transcription factor activity // protein binding	---	---
10541112	0.636758	0.00264652	---	ENSMUST00000118257	ENSEMBL	cdna:pseudogene chromosome:NCBIM37:6:117947225:117948010:1 gene:ENSMUSG00000082791 gene_biotype:pseudogene transcript_biotype:transcribed_processed_pseudogene	FALSE	---	---	---	---	---	---	---	---
10543879	0.705407	0.00228846	Wdr91	NM_001013366	RefSeq	Mus musculus WD repeat domain 91 (Wdr91), mRNA.	FALSE	GO:0008150	biological_process	GO:0005575	cellular_component	GO:0003674	molecular_function	---	---
10556381	0.858013	1.5437e-05	Mical2	NM_001193305	RefSeq	Mus musculus microtubule associated monoxygenase, calponin and LIM domain containing 2 (Mical2), transcript variant A, mRNA.	FALSE	GO:0008150 // GO:0008152 // GO:0055114	biological_process // metabolic process // oxidation-reduction process	GO:0005575 // GO:0005737 // GO:0005856	cellular_component // cytoplasm // cytoskeleton	GO:0003674 // GO:0003779 // GO:0004497 // GO:0008270 // GO:0016491 // GO:0046872	molecular_function // actin binding // monooxygenase activity // zinc ion binding // oxidoreductase activity // metal ion binding	---	---
10556463	3.0091	5.00977e-07	Arntl	NM_007489	RefSeq	Mus musculus aryl hydrocarbon receptor nuclear translocator-like (Arntl), transcript variant 1, mRNA.	FALSE	GO:0000060 // GO:0006351 // GO:0006355 // GO:0006355 // GO:0007165 // GO:0007623 // GO:0007623 // GO:0042176 // GO:0045944 // GO:0045944 // GO:0045944 // GO:0045944	protein import into nucleus, translocation // transcription, DNA-dependent // regulation of transcription, DNA-dependent // regulation of transcription, DNA-dependent // signal transduction // circadian rhythm // circadian rhythm // regulation of protein catabolic process // positive regulation of transcription from RNA polymerase II promoter // positive regulation of transcription from RNA polym…	GO:0005634 // GO:0005667 // GO:0005667 // GO:0005737	nucleus // transcription factor complex // transcription factor complex // cytoplasm	GO:0000982 // GO:0001077 // GO:0001190 // GO:0003677 // GO:0003677 // GO:0003700 // GO:0003700 // GO:0004871 // GO:0004872 // GO:0005515 // GO:0008134 // GO:0017162 // GO:0043425 // GO:0046982 // GO:0051879	RNA polymerase II core promoter proximal region sequence-specific DNA binding transcription factor activity // RNA polymerase II core promoter proximal region sequence-specific DNA binding transcription factor activity involved in positive regulation of transcription // RNA polymerase II transcription factor binding transcription factor activity involved in positive regulation of transcription //…	---	---
10558880	1.49742	0.000142717	Eps8l2	NM_133191	RefSeq	Mus musculus EPS8-like 2 (Eps8l2), mRNA.	FALSE	GO:0016601	Rac protein signal transduction	GO:0001726 // GO:0005737 // GO:0005886	ruffle // cytoplasm // plasma membrane	GO:0051015	actin filament binding	---	---
10561212	0.635503	0.00101411	Ltbp4	NM_175641	RefSeq	Mus musculus latent transforming growth factor beta binding protein 4 (Ltbp4), transcript variant 1, mRNA.	FALSE	GO:0007179 // GO:0030162 // GO:0046879	transforming growth factor beta receptor signaling pathway // regulation of proteolysis // hormone secretion	GO:0005576 // GO:0005578 // GO:0005578 // GO:0005615	extracellular region // proteinaceous extracellular matrix // proteinaceous extracellular matrix // extracellular space	GO:0005509 // GO:0019838 // GO:0050431	calcium ion binding // growth factor binding // transforming growth factor beta binding	---	---
10563780	1.42539	0.00232394	E2f8	NM_001013368	RefSeq	Mus musculus E2F transcription factor 8 (E2f8), mRNA.	FALSE	GO:0006351 // GO:0006355 // GO:0007049 // GO:0008283	transcription, DNA-dependent // regulation of transcription, DNA-dependent // cell cycle // cell proliferation	GO:0005634 // GO:0005667	nucleus // transcription factor complex	GO:0003677 // GO:0003700 // GO:0042802 // GO:0042803	DNA binding // sequence-specific DNA binding transcription factor activity // identical protein binding // protein homodimerization activity	---	---
10565002	0.81662	0.0026315	Crtc3	NM_173863	RefSeq	Mus musculus CREB regulated transcription coactivator 3 (Crtc3), mRNA.	FALSE	GO:0006351 // GO:0006355 // GO:0008150 // GO:0032793 // GO:0051289	transcription, DNA-dependent // regulation of transcription, DNA-dependent // biological_process // positive regulation of CREB transcription factor activity // protein homotetramerization	GO:0005634 // GO:0005737	nucleus // cytoplasm	GO:0003674 // GO:0008140	molecular_function // cAMP response element binding protein binding	---	---
10565343	1.14267	0.00205441	Vmn2r65	NM_001105180	RefSeq	Mus musculus vomeronasal 2, receptor 65 (Vmn2r65), mRNA.	FALSE	GO:0007165 // GO:0007186 // GO:0008150	signal transduction // G-protein coupled receptor signaling pathway // biological_process	GO:0005575 // GO:0005886 // GO:0016020 // GO:0016021	cellular_component // plasma membrane // membrane // integral to membrane	GO:0003674 // GO:0004871 // GO:0004872 // GO:0004930	molecular_function // signal transducer activity // receptor activity // G-protein coupled receptor activity	---	---
10565456	0.781675	0.000411944	Prss23	NM_029614	RefSeq	Mus musculus protease, serine, 23 (Prss23), mRNA.	FALSE	GO:0006508	proteolysis	GO:0005576 // GO:0005634	extracellular region // nucleus	GO:0003824 // GO:0004252 // GO:0008233 // GO:0008236 // GO:0016787	catalytic activity // serine-type endopeptidase activity // peptidase activity // serine-type peptidase activity // hydrolase activity	---	---
10566767	1.32748	6.35867e-06	St5	NM_001001326	RefSeq	Mus musculus suppression of tumorigenicity 5 (St5), transcript variant 1, mRNA.	FALSE	GO:0070374	positive regulation of ERK1 and ERK2 cascade	GO:0005575	cellular_component	GO:0003674	molecular_function	---	---
10575833	0.589843	0.00278609	Hsd17b2	NM_008290	RefSeq	Mus musculus hydroxysteroid (17-beta) dehydrogenase 2 (Hsd17b2), mRNA.	FALSE	GO:0006694 // GO:0006702 // GO:0006703 // GO:0008152 // GO:0008610 // GO:0032526 // GO:0055114	steroid biosynthetic process // androgen biosynthetic process // estrogen biosynthetic process // metabolic process // lipid biosynthetic process // response to retinoic acid // oxidation-reduction process	GO:0005792 // GO:0016020 // GO:0016021	microsome // membrane // integral to membrane	GO:0000166 // GO:0004303 // GO:0016491 // GO:0050327	nucleotide binding // estradiol 17-beta-dehydrogenase activity // oxidoreductase activity // testosterone 17-beta-dehydrogenase (NAD+) activity	GenMAPP	Steroid_Biosynthesis
10576010	0.637843	0.00299975	Gse1	NM_198671	RefSeq	Mus musculus genetic suppressor element 1 (Gse1), transcript variant 1, mRNA.	FALSE	GO:0008150	biological_process	GO:0005575	cellular_component	GO:0003674	molecular_function	---	---
10584288	0.632734	0.00214789	Robo4	NM_028783	RefSeq	Mus musculus roundabout homolog 4 (Drosophila) (Robo4), mRNA.	FALSE	GO:0001525 // GO:0007275 // GO:0030154 // GO:0030336	angiogenesis // multicellular organismal development // cell differentiation // negative regulation of cell migration	GO:0009897 // GO:0016021	external side of plasma membrane // integral to membrane	GO:0004872 // GO:0005515	receptor activity // protein binding	---	---
10586368	1.28685	3.21066e-06	Clpx	NM_011802	RefSeq	Mus musculus caseinolytic peptidase X (E.coli) (Clpx), transcript variant 1, mRNA.	FALSE	GO:0006200 // GO:0006457 // GO:0010952 // GO:0051603	ATP catabolic process // protein folding // positive regulation of peptidase activity // proteolysis involved in cellular protein catabolic process	GO:0005634 // GO:0005739 // GO:0005739 // GO:0005743 // GO:0009841 // GO:0042645	nucleus // mitochondrion // mitochondrion // mitochondrial inner membrane // mitochondrial endopeptidase Clp complex // mitochondrial nucleoid	GO:0000166 // GO:0005515 // GO:0005524 // GO:0016504 // GO:0016887 // GO:0017111 // GO:0046872 // GO:0051082	nucleotide binding // protein binding // ATP binding // peptidase activator activity // ATPase activity // nucleoside-triphosphatase activity // metal ion binding // unfolded protein binding	---	---
10586781	0.600712	0.00300294	Myo1e	NM_181072	RefSeq	Mus musculus myosin IE (Myo1e), mRNA.	FALSE	GO:0001570 // GO:0001701 // GO:0001822 // GO:0003094 // GO:0006807 // GO:0006897 // GO:0030097 // GO:0032836 // GO:0035166 // GO:0048008 // GO:0072015	vasculogenesis // in utero embryonic development // kidney development // glomerular filtration // nitrogen compound metabolic process // endocytosis // hemopoiesis // glomerular basement membrane development // post-embryonic hemopoiesis // platelet-derived growth factor receptor signaling pathway // glomerular visceral epithelial cell development	GO:0005737 // GO:0005856 // GO:0005911 // GO:0005912 // GO:0016459 // GO:0030054 // GO:0031410 // GO:0043234	cytoplasm // cytoskeleton // cell-cell junction // adherens junction // myosin complex // cell junction // cytoplasmic vesicle // protein complex	GO:0000166 // GO:0003774 // GO:0003779 // GO:0005516 // GO:0005524 // GO:0008289 // GO:0032403 // GO:0035091 // GO:0042623 // GO:0051015	nucleotide binding // motor activity // actin binding // calmodulin binding // ATP binding // lipid binding // protein complex binding // phosphatidylinositol binding // ATPase activity, coupled // actin filament binding	---	---
10587211	0.806717	0.00191822	Leo1	NM_001039522	RefSeq	Mus musculus Leo1, Paf1/RNA polymerase II complex component, homolog (S. cerevisiae) (Leo1), mRNA.	FALSE	GO:0001711 // GO:0006351 // GO:0006355 // GO:0006378 // GO:0010390 // GO:0016055 // GO:0019827 // GO:0019827 // GO:0031442 // GO:0032968 // GO:0033523 // GO:0045638 // GO:0045944	endodermal cell fate commitment // transcription, DNA-dependent // regulation of transcription, DNA-dependent // mRNA polyadenylation // histone monoubiquitination // Wnt receptor signaling pathway // stem cell maintenance // stem cell maintenance // positive regulation of mRNA 3'-end processing // positive regulation of transcription elongation from RNA polymerase II promoter // histone H2B ubiq…	GO:0005634 // GO:0005730 // GO:0016593	nucleus // nucleolus // Cdc73/Paf1 complex	---	---	---	---
10590438	1.3679	0.00381275	Fam198a	ENSMUST00000098269	ENSEMBL	cdna:known chromosome:NCBIM37:9:121861852:121887803:1 gene:ENSMUSG00000038233 gene_biotype:protein_coding transcript_biotype:protein_coding	FALSE	GO:0008150	biological_process	GO:0005575 // GO:0005576	cellular_component // extracellular region	GO:0003674	molecular_function	---	---
10591535	0.691818	0.00115268	Mir199a-1	NR_029585	RefSeq	Mus musculus microRNA 199a-1 (Mir199a-1), microRNA.	FALSE	GO:0070482 // GO:0071230	response to oxygen levels // cellular response to amino acid stimulus	---	---	---	---	---	---
10592164	0.689825	0.0016048	Pate4	NM_020264	RefSeq	Mus musculus prostate and testis expressed 4 (Pate4), mRNA.	FALSE	GO:0009611 // GO:0050804	response to wounding // regulation of synaptic transmission	GO:0001669 // GO:0005576 // GO:0005615	acrosomal vesicle // extracellular region // extracellular space	GO:0005516	calmodulin binding	---	---
10597136	0.645534	0.00181836	Ptpn23	NM_001081043	RefSeq	Mus musculus protein tyrosine phosphatase, non-receptor type 23 (Ptpn23), mRNA.	FALSE	GO:0006470 // GO:0016311 // GO:0030030 // GO:0060271	protein dephosphorylation // dephosphorylation // cell projection organization // cilium morphogenesis	GO:0005634 // GO:0005737 // GO:0005768 // GO:0005856 // GO:0005929 // GO:0005932 // GO:0031410 // GO:0042995	nucleus // cytoplasm // endosome // cytoskeleton // cilium // microtubule basal body // cytoplasmic vesicle // cell projection	GO:0004721 // GO:0004725 // GO:0016787 // GO:0016791	phosphoprotein phosphatase activity // protein tyrosine phosphatase activity // hydrolase activity // phosphatase activity	---	---
10597258	0.927784	0.000607361	Tmie	NM_146260	RefSeq	Mus musculus transmembrane inner ear (Tmie), mRNA.	FALSE	GO:0007605 // GO:0042472	sensory perception of sound // inner ear morphogenesis	GO:0016020 // GO:0016021	membrane // integral to membrane	---	---	---	---
10597875	1.094	0.00129744	Cyp8b1	NM_010012	RefSeq	Mus musculus cytochrome P450, family 8, subfamily b, polypeptide 1 (Cyp8b1), mRNA.	FALSE	GO:0055114	oxidation-reduction process	GO:0005783 // GO:0016020 // GO:0016021	endoplasmic reticulum // membrane // integral to membrane	GO:0004497 // GO:0005506 // GO:0008397 // GO:0009055 // GO:0016491 // GO:0016705 // GO:0020037 // GO:0033778 // GO:0046872	monooxygenase activity // iron ion binding // sterol 12-alpha-hydroxylase activity // electron carrier activity // oxidoreductase activity // oxidoreductase activity, acting on paired donors, with incorporation or reduction of molecular oxygen // heme binding // 7alpha-hydroxycholest-4-en-3-one 12alpha-hydroxylase activity // metal ion binding	---	---
10600122	1.58757	0.00450372	Xlr3b	NM_001081643	RefSeq	Mus musculus X-linked lymphocyte-regulated 3B (Xlr3b), mRNA.	FALSE	GO:0008150	biological_process	GO:0005575	cellular_component	GO:0003674	molecular_function	---	---
10600688	0.659642	0.00455063	Tab3	NM_025729	RefSeq	Mus musculus TGF-beta activated kinase 1/MAP3K7 binding protein 3 (Tab3), mRNA.	FALSE	GO:0016310	phosphorylation	GO:0005622	intracellular	GO:0008270 // GO:0016301 // GO:0046872	zinc ion binding // kinase activity // metal ion binding	---	---
10604996	1.58743	0.00437021	Xlr3a	NM_001110784	RefSeq	Mus musculus X-linked lymphocyte-regulated 3A (Xlr3a), mRNA.	FALSE	GO:0008150	biological_process	GO:0005575	cellular_component	GO:0003674	molecular_function	---	---

## Sheet: down.RAvsWT
Table S2: Lists of genes differentially expressed between wildtype (WT), Rassf1a-/- Sav1+/+ (RA), Rassf1a+/+ Sav1+/- (SA) and Rassf1a-/- Sav1+/- (RA_SA) mouse livers
ID	RA.vs.WT.FC	RA.vs.WT.p	Gene.Symbol	mRNA.Accession	mRNA..Source	mRna...Description	mRNA...xhyb	GO.Biological.Process.ID	GO.Biological.Process.Term	GO.Cellular.Component.ID	GO.Cellular.Component.Term	GO.Molecular.Function.ID	GO.Molecular.Function.Term	Pathway.Source	Pathway.Name
10338899	-1.07401	0.00110966	---	---	---	---	---	---	---	---	---	---	---	---	---
10339323	-0.78855	0.00387239	---	---	---	---	---	---	---	---	---	---	---	---	---
10339506	-2.93516	0.00221409	---	---	---	---	---	---	---	---	---	---	---	---	---
10341478	-0.705866	0.00151917	---	---	---	---	---	---	---	---	---	---	---	---	---
10341509	-2.80118	0.00443726	---	---	---	---	---	---	---	---	---	---	---	---	---
10342266	-1.18078	0.00387954	---	---	---	---	---	---	---	---	---	---	---	---	---
10342805	-1.31703	0.000155567	---	---	---	---	---	---	---	---	---	---	---	---	---
10342845	-0.941183	0.00417095	---	---	---	---	---	---	---	---	---	---	---	---	---
10342925	-2.60777	0.00245692	---	---	---	---	---	---	---	---	---	---	---	---	---
10343142	-1.77925	0.000449225	---	---	---	---	---	---	---	---	---	---	---	---	---
10343703	-2.40962	8.59546e-05	---	---	---	---	---	---	---	---	---	---	---	---	---
10343805	-1.68869	0.000740171	---	---	---	---	---	---	---	---	---	---	---	---	---
10344358	-0.939599	0.00469834	---	---	---	---	---	---	---	---	---	---	---	---	---
10344532	-1.30262	0.000710123	---	---	---	---	---	---	---	---	---	---	---	---	---
10344572	-1.06321	0.0021442	---	---	---	---	---	---	---	---	---	---	---	---	---
10346298	-2.14729	4.17268e-06	Coq10b	NM_001039710	RefSeq	Mus musculus coenzyme Q10 homolog B (S. cerevisiae) (Coq10b), nuclear gene encoding mitochondrial protein, transcript variant 1, mRNA.	FALSE	GO:0008150	biological_process	GO:0005739 // GO:0005743 // GO:0016020	mitochondrion // mitochondrial inner membrane // membrane	GO:0003674	molecular_function	---	---
10349932	-0.687574	6.83231e-05	Etnk2	NM_175443	RefSeq	Mus musculus ethanolamine kinase 2 (Etnk2), mRNA.	FALSE	GO:0001701 // GO:0001890 // GO:0006646 // GO:0008654 // GO:0009791 // GO:0016310 // GO:0035264	in utero embryonic development // placenta development // phosphatidylethanolamine biosynthetic process // phospholipid biosynthetic process // post-embryonic development // phosphorylation // multicellular organism growth	GO:0005575	cellular_component	GO:0000166 // GO:0004103 // GO:0004305 // GO:0005524 // GO:0016301 // GO:0016740 // GO:0016772 // GO:0016773	nucleotide binding // choline kinase activity // ethanolamine kinase activity // ATP binding // kinase activity // transferase activity // transferase activity, transferring phosphorus-containing groups // phosphotransferase activity, alcohol group as acceptor	---	---
10351533	-0.647147	0.00100576	Nr1i3	NM_009803	RefSeq	Mus musculus nuclear receptor subfamily 1, group I, member 3 (Nr1i3), transcript variant 1, mRNA.	FALSE	GO:0006351 // GO:0006355 // GO:0043401 // GO:0045892	transcription, DNA-dependent // regulation of transcription, DNA-dependent // steroid hormone mediated signaling pathway // negative regulation of transcription, DNA-dependent	GO:0005634 // GO:0005737 // GO:0005829 // GO:0005856	nucleus // cytoplasm // cytosol // cytoskeleton	GO:0003677 // GO:0003700 // GO:0003707 // GO:0004872 // GO:0004887 // GO:0005515 // GO:0008270 // GO:0043565 // GO:0046872	DNA binding // sequence-specific DNA binding transcription factor activity // steroid hormone receptor activity // receptor activity // thyroid hormone receptor activity // protein binding // zinc ion binding // sequence-specific DNA binding // metal ion binding	GenMAPP	Nuclear_Receptors
10351769	-1.05446	0.000862339	Igsf8	NM_080419	RefSeq	Mus musculus immunoglobulin superfamily, member 8 (Igsf8), mRNA.	FALSE	GO:0008150	biological_process	GO:0005886 // GO:0016020 // GO:0016021 // GO:0016021	plasma membrane // membrane // integral to membrane // integral to membrane	GO:0005515	protein binding	---	---
10356406	-0.662782	0.00303278	Ngef	NM_001111314	RefSeq	Mus musculus neuronal guanine nucleotide exchange factor (Ngef), transcript variant 1, mRNA.	FALSE	GO:0007275 // GO:0007399 // GO:0009987 // GO:0030154 // GO:0035023 // GO:0043087 // GO:0048013 // GO:0061002	multicellular organismal development // nervous system development // cellular process // cell differentiation // regulation of Rho protein signal transduction // regulation of GTPase activity // ephrin receptor signaling pathway // negative regulation of dendritic spine morphogenesis	GO:0005622 // GO:0005737 // GO:0005886 // GO:0016020 // GO:0042995	intracellular // cytoplasm // plasma membrane // membrane // cell projection	GO:0005085 // GO:0005089 // GO:0005515 // GO:0005543 // GO:0046875	guanyl-nucleotide exchange factor activity // Rho guanyl-nucleotide exchange factor activity // protein binding // phospholipid binding // ephrin receptor binding	---	---
10356601	-2.2173	1.70269e-06	Per2	NM_011066	RefSeq	Mus musculus period homolog 2 (Drosophila) (Per2), mRNA.	FALSE	GO:0000122 // GO:0000122 // GO:0006351 // GO:0006355 // GO:0007165 // GO:0007623 // GO:0048511	negative regulation of transcription from RNA polymerase II promoter // negative regulation of transcription from RNA polymerase II promoter // transcription, DNA-dependent // regulation of transcription, DNA-dependent // signal transduction // circadian rhythm // rhythmic process	GO:0005634 // GO:0005634 // GO:0005737	nucleus // nucleus // cytoplasm	GO:0000988 // GO:0004871 // GO:0005515	protein binding transcription factor activity // signal transducer activity // protein binding	GenMAPP	Circadian_Exercise
10358454	-0.751084	0.00455408	Rbm3	NM_001166409	RefSeq	Mus musculus RNA binding motif protein 3 (Rbm3), transcript variant 2, mRNA.	FALSE	GO:0006412 // GO:0006417 // GO:0006950 // GO:0009409 // GO:0035196 // GO:0045727	translation // regulation of translation // response to stress // response to cold // production of miRNAs involved in gene silencing by miRNA // positive regulation of translation	GO:0005634 // GO:0005737 // GO:0015934 // GO:0030425 // GO:0042995	nucleus // cytoplasm // large ribosomal subunit // dendrite // cell projection	GO:0000166 // GO:0003676 // GO:0003723 // GO:0043023	nucleotide binding // nucleic acid binding // RNA binding // ribosomal large subunit binding	---	---
10361906	-0.782078	0.00180592	Il22ra2	NM_178258	RefSeq	Mus musculus interleukin 22 receptor, alpha 2 (Il22ra2), mRNA.	FALSE	GO:0042516	regulation of tyrosine phosphorylation of Stat3 protein	GO:0005576 // GO:0005829	extracellular region // cytosol	GO:0004872 // GO:0005515 // GO:0042017 // GO:0042018	receptor activity // protein binding // interleukin-22 binding // interleukin-22 receptor activity	---	---
10365492	-0.879558	0.00362799	---	---	---	---	---	---	---	---	---	---	---	---	---
10367041	-1.35323	0.000910504	Rdh9	NM_153133	RefSeq	Mus musculus retinol dehydrogenase 9 (Rdh9), mRNA.	FALSE	GO:0042904 // GO:0055114	9-cis-retinoic acid biosynthetic process // oxidation-reduction process	GO:0005575	cellular_component	GO:0004745	retinol dehydrogenase activity	---	---
10370780	-0.713888	0.00118711	Pcsk4	NM_008793	RefSeq	Mus musculus proprotein convertase subtilisin/kexin type 4 (Pcsk4), mRNA.	FALSE	GO:0006508 // GO:0007339 // GO:0007340 // GO:0008152 // GO:0009566 // GO:0048240	proteolysis // binding of sperm to zona pellucida // acrosome reaction // metabolic process // fertilization // sperm capacitation	GO:0002080	acrosomal membrane	GO:0004252 // GO:0008233 // GO:0008236 // GO:0016787	serine-type endopeptidase activity // peptidase activity // serine-type peptidase activity // hydrolase activity	---	---
10370931	-0.989378	0.000180011	Mknk2	ENSMUST00000072616	ENSEMBL	cdna:known chromosome:NCBIM37:10:80128532:80139038:-1 gene:ENSMUSG00000020190 gene_biotype:protein_coding transcript_biotype:protein_coding	FALSE	GO:0006417 // GO:0006468 // GO:0006468 // GO:0006468 // GO:0006915 // GO:0007243 // GO:0007243 // GO:0016310 // GO:0030097 // GO:0071243	regulation of translation // protein phosphorylation // protein phosphorylation // protein phosphorylation // apoptotic process // intracellular protein kinase cascade // intracellular protein kinase cascade // phosphorylation // hemopoiesis // cellular response to arsenic-containing substance	GO:0005634 // GO:0005737	nucleus // cytoplasm	GO:0000166 // GO:0004672 // GO:0004674 // GO:0004674 // GO:0005515 // GO:0005524 // GO:0005524 // GO:0016301 // GO:0016740 // GO:0016772 // GO:0046872	nucleotide binding // protein kinase activity // protein serine/threonine kinase activity // protein serine/threonine kinase activity // protein binding // ATP binding // ATP binding // kinase activity // transferase activity // transferase activity, transferring phosphorus-containing groups // metal ion binding	---	---
10373452	-4.16423	1.18344e-06	---	GENSCAN00000035267	ENSEMBL	cdna:genscan chromosome:NCBIM37:10:127981235:127987794:-1 transcript_biotype:protein_coding	FALSE	---	---	---	---	---	---	---	---
10375343	-1.15667	0.00136185	Rnf145	NM_028862	RefSeq	Mus musculus ring finger protein 145 (Rnf145), transcript variant 1, mRNA.	FALSE	GO:0008150	biological_process	GO:0005575 // GO:0016020 // GO:0016021	cellular_component // membrane // integral to membrane	GO:0003674 // GO:0008270 // GO:0046872	molecular_function // zinc ion binding // metal ion binding	---	---
10377439	-1.84974	0.000257569	Per1	NM_001159367	RefSeq	Mus musculus period homolog 1 (Drosophila) (Per1), transcript variant 2, mRNA.	FALSE	GO:0000122 // GO:0006351 // GO:0006355 // GO:0007165 // GO:0007623 // GO:0007623 // GO:0032922 // GO:0045892 // GO:0048511	negative regulation of transcription from RNA polymerase II promoter // transcription, DNA-dependent // regulation of transcription, DNA-dependent // signal transduction // circadian rhythm // circadian rhythm // circadian regulation of gene expression // negative regulation of transcription, DNA-dependent // rhythmic process	GO:0005634 // GO:0005737	nucleus // cytoplasm	GO:0000978 // GO:0000988 // GO:0004871 // GO:0005515 // GO:0070888	RNA polymerase II core promoter proximal region sequence-specific DNA binding // protein binding transcription factor activity // signal transducer activity // protein binding // E-box binding	---	---
10379633	-0.924746	0.00142253	Slfn1	NM_011407	RefSeq	Mus musculus schlafen 1 (Slfn1), mRNA.	FALSE	GO:0000082 // GO:0007050 // GO:0008285	G1/S transition of mitotic cell cycle // cell cycle arrest // negative regulation of cell proliferation	GO:0005575	cellular_component	---	---	---	---
10383152	-1.29458	0.000518406	Rnf213	ENSMUST00000131035	ENSEMBL	cdna:known chromosome:NCBIM37:11:119254414:119348732:1 gene:ENSMUSG00000070327 gene_biotype:protein_coding transcript_biotype:protein_coding	FALSE	GO:0006200 // GO:0016567 // GO:0051865	ATP catabolic process // protein ubiquitination // protein autoubiquitination	GO:0005737	cytoplasm	GO:0000166 // GO:0004842 // GO:0008270 // GO:0016874 // GO:0016887 // GO:0017111 // GO:0046872	nucleotide binding // ubiquitin-protein ligase activity // zinc ion binding // ligase activity // ATPase activity // nucleoside-triphosphatase activity // metal ion binding	---	---
10383168	-1.36629	5.64707e-05	---	---	---	---	---	---	---	---	---	---	---	---	---
10383192	-1.63536	0.000278708	---	---	---	---	---	---	---	---	---	---	---	---	---
10383194	-1.22469	1.81625e-05	Rnf213	ENSMUST00000131035	ENSEMBL	cdna:known chromosome:NCBIM37:11:119254414:119348732:1 gene:ENSMUSG00000070327 gene_biotype:protein_coding transcript_biotype:protein_coding	FALSE	GO:0006200 // GO:0016567 // GO:0051865	ATP catabolic process // protein ubiquitination // protein autoubiquitination	GO:0005737	cytoplasm	GO:0000166 // GO:0004842 // GO:0008270 // GO:0016874 // GO:0016887 // GO:0017111 // GO:0046872	nucleotide binding // ubiquitin-protein ligase activity // zinc ion binding // ligase activity // ATPase activity // nucleoside-triphosphatase activity // metal ion binding	---	---
10383198	-1.27638	0.000573404	---	---	---	---	---	---	---	---	---	---	---	---	---
10383200	-1.31646	0.00266582	---	---	---	---	---	---	---	---	---	---	---	---	---
10383202	-1.41129	0.00131092	Rnf213	ENSMUST00000131035	ENSEMBL	cdna:known chromosome:NCBIM37:11:119254414:119348732:1 gene:ENSMUSG00000070327 gene_biotype:protein_coding transcript_biotype:protein_coding	FALSE	GO:0006200 // GO:0016567 // GO:0051865	ATP catabolic process // protein ubiquitination // protein autoubiquitination	GO:0005737	cytoplasm	GO:0000166 // GO:0004842 // GO:0008270 // GO:0016874 // GO:0016887 // GO:0017111 // GO:0046872	nucleotide binding // ubiquitin-protein ligase activity // zinc ion binding // ligase activity // ATPase activity // nucleoside-triphosphatase activity // metal ion binding	---	---
10383204	-1.5155	0.000160623	Rnf213	ENSMUST00000131035	ENSEMBL	cdna:known chromosome:NCBIM37:11:119254414:119348732:1 gene:ENSMUSG00000070327 gene_biotype:protein_coding transcript_biotype:protein_coding	FALSE	GO:0006200 // GO:0016567 // GO:0051865	ATP catabolic process // protein ubiquitination // protein autoubiquitination	GO:0005737	cytoplasm	GO:0000166 // GO:0004842 // GO:0008270 // GO:0016874 // GO:0016887 // GO:0017111 // GO:0046872	nucleotide binding // ubiquitin-protein ligase activity // zinc ion binding // ligase activity // ATPase activity // nucleoside-triphosphatase activity // metal ion binding	---	---
10383206	-1.11753	0.00135816	---	---	---	---	---	---	---	---	---	---	---	---	---
10383208	-1.59323	0.000329031	---	---	---	---	---	---	---	---	---	---	---	---	---
10383210	-1.1731	0.000473785	Rnf213	ENSMUST00000131035	ENSEMBL	cdna:known chromosome:NCBIM37:11:119254414:119348732:1 gene:ENSMUSG00000070327 gene_biotype:protein_coding transcript_biotype:protein_coding	FALSE	GO:0006200 // GO:0016567 // GO:0051865	ATP catabolic process // protein ubiquitination // protein autoubiquitination	GO:0005737	cytoplasm	GO:0000166 // GO:0004842 // GO:0008270 // GO:0016874 // GO:0016887 // GO:0017111 // GO:0046872	nucleotide binding // ubiquitin-protein ligase activity // zinc ion binding // ligase activity // ATPase activity // nucleoside-triphosphatase activity // metal ion binding	---	---
10383212	-1.42033	8.90809e-05	Rnf213	ENSMUST00000131035	ENSEMBL	cdna:known chromosome:NCBIM37:11:119254414:119348732:1 gene:ENSMUSG00000070327 gene_biotype:protein_coding transcript_biotype:protein_coding	FALSE	GO:0006200 // GO:0016567 // GO:0051865	ATP catabolic process // protein ubiquitination // protein autoubiquitination	GO:0005737	cytoplasm	GO:0000166 // GO:0004842 // GO:0008270 // GO:0016874 // GO:0016887 // GO:0017111 // GO:0046872	nucleotide binding // ubiquitin-protein ligase activity // zinc ion binding // ligase activity // ATPase activity // nucleoside-triphosphatase activity // metal ion binding	---	---
10383214	-1.42918	6.68229e-05	Rnf213	AK173199	GenBank	Mus musculus premature mRNA for mKIAA1554 protein.	FALSE	GO:0006200 // GO:0016567 // GO:0051865	ATP catabolic process // protein ubiquitination // protein autoubiquitination	GO:0005737	cytoplasm	GO:0000166 // GO:0004842 // GO:0008270 // GO:0016874 // GO:0016887 // GO:0017111 // GO:0046872	nucleotide binding // ubiquitin-protein ligase activity // zinc ion binding // ligase activity // ATPase activity // nucleoside-triphosphatase activity // metal ion binding	---	---
10383233	-1.23627	0.00131131	Rnf213	AK173199	GenBank	Mus musculus premature mRNA for mKIAA1554 protein.	FALSE	GO:0006200 // GO:0016567 // GO:0051865	ATP catabolic process // protein ubiquitination // protein autoubiquitination	GO:0005737	cytoplasm	GO:0000166 // GO:0004842 // GO:0008270 // GO:0016874 // GO:0016887 // GO:0017111 // GO:0046872	nucleotide binding // ubiquitin-protein ligase activity // zinc ion binding // ligase activity // ATPase activity // nucleoside-triphosphatase activity // metal ion binding	---	---
10386473	-0.762395	0.0023337	Srebf1	NM_011480	RefSeq	Mus musculus sterol regulatory element binding transcription factor 1 (Srebf1), mRNA.	FALSE	GO:0000122 // GO:0000122 // GO:0003062 // GO:0006351 // GO:0006355 // GO:0006355 // GO:0006355 // GO:0006629 // GO:0008202 // GO:0008203 // GO:0008286 // GO:0008610 // GO:0009267 // GO:0009267 // GO:0009749 // GO:0010867 // GO:0010867 // GO:0019217 // GO:0031065 // GO:0035104 // GO:0045542 // GO:0045723 // GO:0045893 // GO:0045893 // GO:0045944 // GO:0045944 // GO:0046676 // GO:0050796	negative regulation of transcription from RNA polymerase II promoter // negative regulation of transcription from RNA polymerase II promoter // regulation of heart rate by chemical signal // transcription, DNA-dependent // regulation of transcription, DNA-dependent // regulation of transcription, DNA-dependent // regulation of transcription, DNA-dependent // lipid metabolic process // steroid met…	GO:0005634 // GO:0005634 // GO:0005737 // GO:0005783 // GO:0005792 // GO:0005794 // GO:0016020 // GO:0016021 // GO:0031410 // GO:0043234 // GO:0044444	nucleus // nucleus // cytoplasm // endoplasmic reticulum // microsome // Golgi apparatus // membrane // integral to membrane // cytoplasmic vesicle // protein complex // cytoplasmic part	GO:0003677 // GO:0003682 // GO:0003700 // GO:0003700 // GO:0005515 // GO:0019901 // GO:0032403 // GO:0032810 // GO:0032810 // GO:0043565 // GO:0043565	DNA binding // chromatin binding // sequence-specific DNA binding transcription factor activity // sequence-specific DNA binding transcription factor activity // protein binding // protein kinase binding // protein complex binding // sterol response element binding // sterol response element binding // sequence-specific DNA binding // sequence-specific DNA binding	---	---
10393904	-0.8843	0.000126888	Notum	NM_175263	RefSeq	Mus musculus notum pectinacetylesterase homolog (Drosophila) (Notum), mRNA.	FALSE	GO:0008150	biological_process	GO:0005575 // GO:0005576	cellular_component // extracellular region	GO:0003674 // GO:0016787	molecular_function // hydrolase activity	---	---
10395259	-1.14936	4.83559e-05	Nampt	NM_021524	RefSeq	Mus musculus nicotinamide phosphoribosyltransferase (Nampt), mRNA.	FALSE	GO:0009435 // GO:0019363 // GO:0048661 // GO:0051770	NAD biosynthetic process // pyridine nucleotide biosynthetic process // positive regulation of smooth muscle cell proliferation // positive regulation of nitric-oxide synthase biosynthetic process	GO:0005634 // GO:0005737 // GO:0005737	nucleus // cytoplasm // cytoplasm	GO:0004514 // GO:0004516 // GO:0005125 // GO:0008144 // GO:0016740 // GO:0016757 // GO:0042803 // GO:0047280 // GO:0047280	nicotinate-nucleotide diphosphorylase (carboxylating) activity // nicotinate phosphoribosyltransferase activity // cytokine activity // drug binding // transferase activity // transferase activity, transferring glycosyl groups // protein homodimerization activity // nicotinamide phosphoribosyltransferase activity // nicotinamide phosphoribosyltransferase activity	---	---
10396652	-1.09598	0.00119862	Hspa2	NM_001002012	RefSeq	Mus musculus heat shock protein 2 (Hspa2), transcript variant 2, mRNA.	FALSE	GO:0001934 // GO:0006950 // GO:0007140 // GO:0007141 // GO:0007286 // GO:0031662 // GO:0070194	positive regulation of protein phosphorylation // response to stress // male meiosis // male meiosis I // spermatid development // positive regulation of cyclin-dependent protein kinase activity involved in G2/M // synaptonemal complex disassembly	GO:0000795 // GO:0001673 // GO:0005739 // GO:0009986 // GO:0009986 // GO:0036128	synaptonemal complex // male germ cell nucleus // mitochondrion // cell surface // cell surface // CatSper complex	GO:0000166 // GO:0005515 // GO:0005524 // GO:0051861	nucleotide binding // protein binding // ATP binding // glycolipid binding	---	---
10402659	-0.89941	0.00189519	Ankrd9	NM_175207	RefSeq	Mus musculus ankyrin repeat domain 9 (Ankrd9), mRNA.	FALSE	GO:0008150	biological_process	GO:0005575	cellular_component	GO:0003674 // GO:0016787	molecular_function // hydrolase activity	---	---
10403023	-1.36357	0.00459075	---	ENSMUST00000103517	ENSEMBL	cdna:known chromosome:NCBIM37:12:116184161:116184454:-1 gene:ENSMUSG00000076708 gene_biotype:IG_V_gene transcript_biotype:IG_V_gene	FALSE	---	---	---	---	---	---	---	---
10403392	-2.33866	5.36899e-05	---	GENSCAN00000045129	ENSEMBL	cdna:genscan chromosome:NCBIM37:13:7386393:7387082:1 transcript_biotype:protein_coding	FALSE	---	---	---	---	---	---	---	---
10411332	-1.5138	0.00217303	Hmgcr	NM_008255	RefSeq	Mus musculus 3-hydroxy-3-methylglutaryl-Coenzyme A reductase (Hmgcr), mRNA.	FALSE	GO:0006695 // GO:0006695 // GO:0006743 // GO:0008284 // GO:0008299 // GO:0008542 // GO:0009790 // GO:0010664 // GO:0010666 // GO:0032874 // GO:0043066 // GO:0043407 // GO:0045908 // GO:0048643 // GO:0048661 // GO:0051262 // GO:0055114 // GO:0055114 // GO:0061045 // GO:0061179 // GO:0070374	cholesterol biosynthetic process // cholesterol biosynthetic process // ubiquinone metabolic process // positive regulation of cell proliferation // isoprenoid biosynthetic process // visual learning // embryo development // negative regulation of striated muscle cell apoptotic process // positive regulation of cardiac muscle cell apoptotic process // positive regulation of stress-activated MAPK …	GO:0005792	microsome	GO:0004420 // GO:0016491 // GO:0042282 // GO:0042803 // GO:0050662 // GO:0070402	hydroxymethylglutaryl-CoA reductase (NADPH) activity // oxidoreductase activity // hydroxymethylglutaryl-CoA reductase activity // protein homodimerization activity // coenzyme binding // NADPH binding	GenMAPP // GenMAPP	Cholesterol_Biosynthesis // Statin_Pathway_PharmGKB
10417798	-0.854034	0.00353747	Kcnk5	NM_021542	RefSeq	Mus musculus potassium channel, subfamily K, member 5 (Kcnk5), mRNA.	FALSE	GO:0006810 // GO:0006811	transport // ion transport	GO:0016020 // GO:0016021	membrane // integral to membrane	GO:0005216	ion channel activity	---	---
10420596	-0.898181	0.00312852	Tnfrsf19	NM_013869	RefSeq	Mus musculus tumor necrosis factor receptor superfamily, member 19 (Tnfrsf19), transcript variant 1, mRNA.	FALSE	GO:0001942 // GO:0043123	hair follicle development // positive regulation of I-kappaB kinase/NF-kappaB cascade	GO:0005576 // GO:0005886 // GO:0016020 // GO:0016021	extracellular region // plasma membrane // membrane // integral to membrane	GO:0004872	receptor activity	---	---
10425158	-1.14737	0.000117048	Pdxp	NM_020271	RefSeq	Mus musculus pyridoxal (pyridoxine, vitamin B6) phosphatase (Pdxp), mRNA.	FALSE	GO:0006470 // GO:0007088 // GO:0008152 // GO:0030836 // GO:0031247 // GO:0032465 // GO:0071318	protein dephosphorylation // regulation of mitosis // metabolic process // positive regulation of actin filament depolymerization // actin rod assembly // regulation of cytokinesis // cellular response to ATP	GO:0005737 // GO:0005829 // GO:0005856 // GO:0005886 // GO:0016020 // GO:0042995	cytoplasm // cytosol // cytoskeleton // plasma membrane // membrane // cell projection	GO:0004647 // GO:0004721 // GO:0016787 // GO:0016791 // GO:0031072 // GO:0033883 // GO:0046872	phosphoserine phosphatase activity // phosphoprotein phosphatase activity // hydrolase activity // phosphatase activity // heat shock protein binding // pyridoxal phosphatase activity // metal ion binding	---	---
10425601	-1.71858	8.24079e-07	Tef	NM_153484	RefSeq	Mus musculus thyrotroph embryonic factor (Tef), transcript variant 2, mRNA.	FALSE	GO:0006351 // GO:0006355 // GO:0045944 // GO:0045944 // GO:0048511	transcription, DNA-dependent // regulation of transcription, DNA-dependent // positive regulation of transcription from RNA polymerase II promoter // positive regulation of transcription from RNA polymerase II promoter // rhythmic process	GO:0005634	nucleus	GO:0003677 // GO:0003690 // GO:0003700 // GO:0005515 // GO:0042803 // GO:0043565 // GO:0046982 // GO:0046983	DNA binding // double-stranded DNA binding // sequence-specific DNA binding transcription factor activity // protein binding // protein homodimerization activity // sequence-specific DNA binding // protein heterodimerization activity // protein dimerization activity	---	---
10428857	-0.595877	0.000865587	Mtss1	NM_001146180	RefSeq	Mus musculus metastasis suppressor 1 (Mtss1), transcript variant 2, mRNA.	FALSE	GO:0007015 // GO:0007165 // GO:0007399 // GO:0007517 // GO:0030041 // GO:0046847 // GO:0050680 // GO:0061333 // GO:0071498 // GO:0072102 // GO:0072160 // GO:2001013	actin filament organization // signal transduction // nervous system development // muscle organ development // actin filament polymerization // filopodium assembly // negative regulation of epithelial cell proliferation // renal tubule morphogenesis // cellular response to fluid shear stress // glomerulus morphogenesis // nephron tubule epithelial cell differentiation // epithelial cell prolifer…	GO:0005737 // GO:0005856 // GO:0015629	cytoplasm // cytoskeleton // actin cytoskeleton	GO:0003779 // GO:0003785 // GO:0005102 // GO:0008093 // GO:0017124	actin binding // actin monomer binding // receptor binding // cytoskeletal adaptor activity // SH3 domain binding	---	---
10433885	-0.813701	0.0031089	Cebpd	NM_007679	RefSeq	Mus musculus CCAAT/enhancer binding protein (C/EBP), delta (Cebpd), mRNA.	FALSE	GO:0006351 // GO:0006355 // GO:0006357 // GO:0045444 // GO:0045444 // GO:0045669 // GO:0045892 // GO:0045944 // GO:0048839	transcription, DNA-dependent // regulation of transcription, DNA-dependent // regulation of transcription from RNA polymerase II promoter // fat cell differentiation // fat cell differentiation // positive regulation of osteoblast differentiation // negative regulation of transcription, DNA-dependent // positive regulation of transcription from RNA polymerase II promoter // inner ear development	GO:0005634 // GO:0005634	nucleus // nucleus	GO:0003677 // GO:0003700 // GO:0005515 // GO:0042803 // GO:0043565 // GO:0044212 // GO:0046982 // GO:0046983	DNA binding // sequence-specific DNA binding transcription factor activity // protein binding // protein homodimerization activity // sequence-specific DNA binding // transcription regulatory region DNA binding // protein heterodimerization activity // protein dimerization activity	---	---
10438530	-0.622015	0.00310282	Clcn2	NM_009900	RefSeq	Mus musculus chloride channel 2 (Clcn2), mRNA.	FALSE	GO:0006810 // GO:0006811 // GO:0006821 // GO:0006821 // GO:0030324 // GO:0034765 // GO:0044070 // GO:0055085 // GO:0060041 // GO:0060689	transport // ion transport // chloride transport // chloride transport // lung development // regulation of ion transmembrane transport // regulation of anion transport // transmembrane transport // retina development in camera-type eye // cell differentiation involved in salivary gland development	GO:0016020 // GO:0016021 // GO:0030425 // GO:0034707 // GO:0043204	membrane // integral to membrane // dendrite // chloride channel complex // perikaryon	GO:0005216 // GO:0005244 // GO:0005247 // GO:0005247 // GO:0005254	ion channel activity // voltage-gated ion channel activity // voltage-gated chloride channel activity // voltage-gated chloride channel activity // chloride channel activity	---	---
10441270	-0.644187	0.00155524	Ripk4	NM_023663	RefSeq	Mus musculus receptor-interacting serine-threonine kinase 4 (Ripk4), mRNA.	FALSE	GO:0002009 // GO:0006468 // GO:0016310	morphogenesis of an epithelium // protein phosphorylation // phosphorylation	GO:0005634 // GO:0005737 // GO:0005737 // GO:0016020	nucleus // cytoplasm // cytoplasm // membrane	GO:0000166 // GO:0004672 // GO:0004674 // GO:0004872 // GO:0005524 // GO:0016301 // GO:0016740 // GO:0016772	nucleotide binding // protein kinase activity // protein serine/threonine kinase activity // receptor activity // ATP binding // kinase activity // transferase activity // transferase activity, transferring phosphorus-containing groups	---	---
10444420	-0.744261	4.27816e-05	Agpat1	NM_001163379	RefSeq	Mus musculus 1-acylglycerol-3-phosphate O-acyltransferase 1 (lysophosphatidic acid acyltransferase, alpha) (Agpat1), transcript variant 1, mRNA.	FALSE	GO:0001819 // GO:0006654 // GO:0006654 // GO:0008152 // GO:0008654	positive regulation of cytokine production // phosphatidic acid biosynthetic process // phosphatidic acid biosynthetic process // metabolic process // phospholipid biosynthetic process	GO:0005575 // GO:0016020 // GO:0016021	cellular_component // membrane // integral to membrane	GO:0003841 // GO:0003841 // GO:0016740 // GO:0016746	1-acylglycerol-3-phosphate O-acyltransferase activity // 1-acylglycerol-3-phosphate O-acyltransferase activity // transferase activity // transferase activity, transferring acyl groups	---	---
10446656	-0.617844	0.00257109	Lpin2	NM_001164885	RefSeq	Mus musculus lipin 2 (Lpin2), transcript variant 1, mRNA.	FALSE	GO:0006351 // GO:0006355 // GO:0006629 // GO:0006631 // GO:0016311 // GO:0045944	transcription, DNA-dependent // regulation of transcription, DNA-dependent // lipid metabolic process // fatty acid metabolic process // dephosphorylation // positive regulation of transcription from RNA polymerase II promoter	GO:0005634 // GO:0005737 // GO:0005783 // GO:0005789 // GO:0005829 // GO:0016020	nucleus // cytoplasm // endoplasmic reticulum // endoplasmic reticulum membrane // cytosol // membrane	GO:0003713 // GO:0008195 // GO:0016787	transcription coactivator activity // phosphatidate phosphatase activity // hydrolase activity	---	---
10447773	-0.71171	0.00346954	Slc22a3	NM_011395	RefSeq	Mus musculus solute carrier family 22 (organic cation transporter), member 3 (Slc22a3), mRNA.	FALSE	GO:0006810 // GO:0006811 // GO:0015695 // GO:0015695 // GO:0015697 // GO:0015697 // GO:0015844 // GO:0015872 // GO:0032098 // GO:0034220 // GO:0034220 // GO:0051608 // GO:0051615 // GO:0055085	transport // ion transport // organic cation transport // organic cation transport // quaternary ammonium group transport // quaternary ammonium group transport // monoamine transport // dopamine transport // regulation of appetite // ion transmembrane transport // ion transmembrane transport // histamine transport // histamine uptake // transmembrane transport	GO:0005887 // GO:0016020 // GO:0016021	integral to plasma membrane // membrane // integral to membrane	GO:0005215 // GO:0005329 // GO:0015075 // GO:0015101 // GO:0015101 // GO:0015651 // GO:0015651 // GO:0019534 // GO:0022857	transporter activity // dopamine transmembrane transporter activity // ion transmembrane transporter activity // organic cation transmembrane transporter activity // organic cation transmembrane transporter activity // quaternary ammonium group transmembrane transporter activity // quaternary ammonium group transmembrane transporter activity // toxin transporter activity // transmembrane transpor…	---	---
10451708	-0.590358	0.00423643	4930556A20Rik	AK016140	GenBank HTC	Mus musculus adult male testis cDNA, RIKEN full-length enriched library, clone:4930556A20 product:hypothetical protein, full insert sequence.	FALSE	GO:0008150	biological_process	GO:0005575	cellular_component	GO:0003674	molecular_function	---	---
10453318	-0.737599	0.00127635	Abcg5	ENSMUST00000066175	ENSEMBL	cdna:known chromosome:NCBIM37:17:85057574:85082351:-1 gene:ENSMUSG00000040505 gene_biotype:protein_coding transcript_biotype:protein_coding	FALSE	GO:0006200 // GO:0006810 // GO:0007588 // GO:0007588 // GO:0010949 // GO:0030299 // GO:0033344 // GO:0033344 // GO:0042632 // GO:0045796	ATP catabolic process // transport // excretion // excretion // negative regulation of intestinal phytosterol absorption // intestinal cholesterol absorption // cholesterol efflux // cholesterol efflux // cholesterol homeostasis // negative regulation of intestinal cholesterol absorption	GO:0016020 // GO:0016021 // GO:0016324 // GO:0016324 // GO:0045177	membrane // integral to membrane // apical plasma membrane // apical plasma membrane // apical part of cell	GO:0000166 // GO:0005524 // GO:0016887 // GO:0017111 // GO:0017127 // GO:0046982	nucleotide binding // ATP binding // ATPase activity // nucleoside-triphosphatase activity // cholesterol transporter activity // protein heterodimerization activity	---	---
10461909	-1.04249	0.00323165	Nmrk1	NM_145497	RefSeq	Mus musculus nicotinamide riboside kinase 1 (Nmrk1), mRNA.	FALSE	GO:0008150 // GO:0016310 // GO:0019363	biological_process // phosphorylation // pyridine nucleotide biosynthetic process	GO:0005575	cellular_component	GO:0000166 // GO:0003674 // GO:0005524 // GO:0016301 // GO:0016740 // GO:0046872 // GO:0050262	nucleotide binding // molecular_function // ATP binding // kinase activity // transferase activity // metal ion binding // ribosylnicotinamide kinase activity	---	---
10463224	-0.746044	8.88182e-05	Marveld1	NM_183195	RefSeq	Mus musculus MARVEL (membrane-associating) domain containing 1 (Marveld1), mRNA.	FALSE	GO:0007049 // GO:0008150	cell cycle // biological_process	GO:0005575 // GO:0005634 // GO:0005737 // GO:0005856 // GO:0005886 // GO:0016020 // GO:0016021	cellular_component // nucleus // cytoplasm // cytoskeleton // plasma membrane // membrane // integral to membrane	GO:0003674	molecular_function	---	---
10468639	-0.929442	0.000723045	Dclre1a	NM_018831	RefSeq	Mus musculus DNA cross-link repair 1A, PSO2 homolog (S. cerevisiae) (Dclre1a), mRNA.	FALSE	GO:0006289	nucleotide-excision repair	GO:0005634 // GO:0005730	nucleus // nucleolus	---	---	---	---
10471072	-0.759	0.000310717	Tor1b	ENSMUST00000028199	ENSEMBL	cdna:known chromosome:NCBIM37:2:30808479:30814535:1 gene:ENSMUSG00000026848 gene_biotype:protein_coding transcript_biotype:protein_coding	FALSE	GO:0051085 // GO:0051260 // GO:0051260 // GO:0071763	chaperone mediated protein folding requiring cofactor // protein homooligomerization // protein homooligomerization // nuclear membrane organization	GO:0005635 // GO:0005737 // GO:0005783 // GO:0005788 // GO:0005788	nuclear envelope // cytoplasm // endoplasmic reticulum // endoplasmic reticulum lumen // endoplasmic reticulum lumen	GO:0000166 // GO:0005515 // GO:0005524 // GO:0017111	nucleotide binding // protein binding // ATP binding // nucleoside-triphosphatase activity	---	---
10471424	-0.910418	0.00176216	Fam102a	NM_153560	RefSeq	Mus musculus family with sequence similarity 102, member A (Fam102a), mRNA.	FALSE	GO:0008150	biological_process	GO:0005575	cellular_component	GO:0003674	molecular_function	---	---
10471753	-0.96077	0.00183791	Olfr347	NM_146943	RefSeq	Mus musculus olfactory receptor 347 (Olfr347), mRNA.	FALSE	GO:0007165 // GO:0007186 // GO:0007186 // GO:0007608	signal transduction // G-protein coupled receptor signaling pathway // G-protein coupled receptor signaling pathway // sensory perception of smell	GO:0016021	integral to membrane	GO:0004871 // GO:0004872 // GO:0004930 // GO:0004984	signal transducer activity // receptor activity // G-protein coupled receptor activity // olfactory receptor activity	---	---
10472199	-1.02189	0.00140365	Upp2	NM_029692	RefSeq	Mus musculus uridine phosphorylase 2 (Upp2), mRNA.	FALSE	GO:0008152 // GO:0009116 // GO:0009166	metabolic process // nucleoside metabolic process // nucleotide catabolic process	GO:0005737 // GO:0045098	cytoplasm // type III intermediate filament	GO:0003824 // GO:0004850 // GO:0004850 // GO:0016740 // GO:0016757 // GO:0016763	catalytic activity // uridine phosphorylase activity // uridine phosphorylase activity // transferase activity // transferase activity, transferring glycosyl groups // transferase activity, transferring pentosyl groups	---	---
10472923	-0.856753	0.000752975	Ak4	NM_001177602	RefSeq	Mus musculus adenylate kinase 4 (Ak4), nuclear gene encoding mitochondrial protein, transcript variant 1, mRNA.	FALSE	GO:0006139 // GO:0016310 // GO:0046033 // GO:0046034 // GO:0046039 // GO:0046939	nucleobase-containing compound metabolic process // phosphorylation // AMP metabolic process // ATP metabolic process // GTP metabolic process // nucleotide phosphorylation	GO:0005739 // GO:0005739 // GO:0005759	mitochondrion // mitochondrion // mitochondrial matrix	GO:0000166 // GO:0004017 // GO:0005524 // GO:0005525 // GO:0016301 // GO:0016740 // GO:0016776 // GO:0019201 // GO:0019205 // GO:0046899	nucleotide binding // adenylate kinase activity // ATP binding // GTP binding // kinase activity // transferase activity // phosphotransferase activity, phosphate group as acceptor // nucleotide kinase activity // nucleobase-containing compound kinase activity // nucleoside triphosphate adenylate kinase activity	---	---
10473880	-0.705749	0.00336479	Lrp4	NM_172668	RefSeq	Mus musculus low density lipoprotein receptor-related protein 4 (Lrp4), transcript variant 1, mRNA.	FALSE	GO:0001822 // GO:0001932 // GO:0001942 // GO:0006897 // GO:0007275 // GO:0008104 // GO:0009953 // GO:0009954 // GO:0016055 // GO:0030154 // GO:0030178 // GO:0030279 // GO:0030326 // GO:0042475 // GO:0042733 // GO:0043113 // GO:0048856 // GO:0051124 // GO:0090090	kidney development // regulation of protein phosphorylation // hair follicle development // endocytosis // multicellular organismal development // protein localization // dorsal/ventral pattern formation // proximal/distal pattern formation // Wnt receptor signaling pathway // cell differentiation // negative regulation of Wnt receptor signaling pathway // negative regulation of ossification // e…	GO:0005886 // GO:0016020 // GO:0016021	plasma membrane // membrane // integral to membrane	GO:0004872 // GO:0005509 // GO:0005515 // GO:0030971 // GO:0042803	receptor activity // calcium ion binding // protein binding // receptor tyrosine kinase binding // protein homodimerization activity	---	---
10474141	-0.903659	0.000427474	Slc1a2	NM_001077514	RefSeq	Mus musculus solute carrier family 1 (glial high affinity glutamate transporter), member 2 (Slc1a2), transcript variant 1, mRNA.	FALSE	GO:0003333 // GO:0006810 // GO:0006835 // GO:0007399 // GO:0007632 // GO:0009416 // GO:0009611 // GO:0010259 // GO:0015807 // GO:0015813 // GO:0015813 // GO:0015813 // GO:0021537 // GO:0030534 // GO:0031668 // GO:0035264 // GO:0042493 // GO:0043200 // GO:0046326 // GO:0051938 // GO:0070779 // GO:0071436	amino acid transmembrane transport // transport // dicarboxylic acid transport // nervous system development // visual behavior // response to light stimulus // response to wounding // multicellular organismal aging // L-amino acid transport // L-glutamate transport // L-glutamate transport // L-glutamate transport // telencephalon development // adult behavior // cellular response to extracellul…	GO:0005624 // GO:0005886 // GO:0005887 // GO:0016020 // GO:0016021 // GO:0030424 // GO:0030673 // GO:0042734 // GO:0043005 // GO:0043197 // GO:0043198 // GO:0045202	membrane fraction // plasma membrane // integral to plasma membrane // membrane // integral to membrane // axon // axolemma // presynaptic membrane // neuron projection // dendritic spine // dendritic shaft // synapse	GO:0005313 // GO:0005314 // GO:0015293 // GO:0015501 // GO:0017153	L-glutamate transmembrane transporter activity // high-affinity glutamate transmembrane transporter activity // symporter activity // glutamate:sodium symporter activity // sodium:dicarboxylate symporter activity	---	---
10474181	0.812605	0.000184179	Abtb2	NM_178890	RefSeq	Mus musculus ankyrin repeat and BTB (POZ) domain containing 2 (Abtb2), mRNA.	FALSE	GO:0008150	biological_process	GO:0005575	cellular_component	GO:0003674 // GO:0003677	molecular_function // DNA binding	---	---
10475990	-0.900813	0.00143323	Slc20a1	NM_015747	RefSeq	Mus musculus solute carrier family 20, member 1 (Slc20a1), transcript variant 1, mRNA.	FALSE	GO:0006810 // GO:0006814 // GO:0006817 // GO:0007165 // GO:0043123	transport // sodium ion transport // phosphate ion transport // signal transduction // positive regulation of I-kappaB kinase/NF-kappaB cascade	GO:0005886 // GO:0016020 // GO:0016021	plasma membrane // membrane // integral to membrane	GO:0004871 // GO:0004872 // GO:0005315 // GO:0005316 // GO:0015293	signal transducer activity // receptor activity // inorganic phosphate transmembrane transporter activity // high affinity inorganic phosphate:sodium symporter activity // symporter activity	---	---
10478890	-1.088	0.000300035	Cebpb	NM_009883	RefSeq	Mus musculus CCAAT/enhancer binding protein (C/EBP), beta (Cebpb), mRNA.	FALSE	GO:0001892 // GO:0006351 // GO:0006355 // GO:0006916 // GO:0006917 // GO:0030154 // GO:0030182 // GO:0032496 // GO:0033598 // GO:0045408 // GO:0045444 // GO:0045444 // GO:0045669 // GO:0045892 // GO:0045893 // GO:0045944 // GO:0045944 // GO:0050873 // GO:0060644 // GO:0071230	embryonic placenta development // transcription, DNA-dependent // regulation of transcription, DNA-dependent // anti-apoptosis // induction of apoptosis // cell differentiation // neuron differentiation // response to lipopolysaccharide // mammary gland epithelial cell proliferation // regulation of interleukin-6 biosynthetic process // fat cell differentiation // fat cell differentiation // posi…	GO:0000790 // GO:0005634 // GO:0005634 // GO:0005737 // GO:0016363	nuclear chromatin // nucleus // nucleus // cytoplasm // nuclear matrix	GO:0001077 // GO:0003677 // GO:0003677 // GO:0003700 // GO:0003705 // GO:0005515 // GO:0008134 // GO:0035259 // GO:0042803 // GO:0042803 // GO:0043565 // GO:0043565 // GO:0046982 // GO:0046982 // GO:0046983	RNA polymerase II core promoter proximal region sequence-specific DNA binding transcription factor activity involved in positive regulation of transcription // DNA binding // DNA binding // sequence-specific DNA binding transcription factor activity // RNA polymerase II distal enhancer sequence-specific DNA binding transcription factor activity // protein binding // transcription factor binding /…	GenMAPP // GenMAPP	Ovarian_Infertility_Genes // Circadian_Exercise
10479981	-0.770247	0.00105636	Gata3	NM_008091	RefSeq	Mus musculus GATA binding protein 3 (Gata3), mRNA.	FALSE	GO:0000122 // GO:0000902 // GO:0001701 // GO:0001709 // GO:0001764 // GO:0001775 // GO:0001819 // GO:0001822 // GO:0001823 // GO:0002088 // GO:0002572 // GO:0003180 // GO:0003215 // GO:0003281 // GO:0006351 // GO:0006355 // GO:0006357 // GO:0006357 // GO:0006357 // GO:0006959 // GO:0007165 // GO:0007399 // GO:0007411 // GO:0008285 // GO:0008584 // GO:0009791 // GO:0009967 // GO:0010595 // GO:0010…	negative regulation of transcription from RNA polymerase II promoter // cell morphogenesis // in utero embryonic development // cell fate determination // neuron migration // cell activation // positive regulation of cytokine production // kidney development // mesonephros development // lens development in camera-type eye // pro-T cell differentiation // aortic valve morphogenesis // cardiac rig…	GO:0000790 // GO:0005634 // GO:0005634 // GO:0005730	nuclear chromatin // nucleus // nucleus // nucleolus	GO:0000976 // GO:0000977 // GO:0000979 // GO:0000987 // GO:0001046 // GO:0001071 // GO:0001071 // GO:0001071 // GO:0001077 // GO:0001078 // GO:0001158 // GO:0003677 // GO:0003700 // GO:0003713 // GO:0003713 // GO:0005134 // GO:0005515 // GO:0008134 // GO:0008270 // GO:0043565 // GO:0043565 // GO:0044212 // GO:0044212 // GO:0046872 // GO:0046983 // GO:0070888 // GO:0071837	transcription regulatory region sequence-specific DNA binding // RNA polymerase II regulatory region sequence-specific DNA binding // RNA polymerase II core promoter sequence-specific DNA binding // core promoter proximal region sequence-specific DNA binding // core promoter sequence-specific DNA binding // nucleic acid binding transcription factor activity // nucleic acid binding transcription f…	---	---
10489891	-1.04478	0.00022148	B4galt5	NM_019835	RefSeq	Mus musculus UDP-Gal:betaGlcNAc beta 1,4-galactosyltransferase, polypeptide 5 (B4galt5), mRNA.	FALSE	GO:0005975	carbohydrate metabolic process	GO:0005794 // GO:0016020 // GO:0016021	Golgi apparatus // membrane // integral to membrane	GO:0016740 // GO:0016757 // GO:0046872	transferase activity // transferase activity, transferring glycosyl groups // metal ion binding	---	---
10491915	-2.30841	0.000582711	Ccrn4l	NM_009834	RefSeq	Mus musculus CCR4 carbon catabolite repression 4-like (S. cerevisiae) (Ccrn4l), mRNA.	FALSE	GO:0048511	rhythmic process	---	---	---	---	---	---
10492330	-0.724448	0.000492698	P2ry1	NM_008772	RefSeq	Mus musculus purinergic receptor P2Y, G-protein coupled 1 (P2ry1), mRNA.	FALSE	GO:0001934 // GO:0001973 // GO:0007165 // GO:0007186 // GO:0007186 // GO:0007193 // GO:0007204 // GO:0009612 // GO:0010469 // GO:0010700 // GO:0019233 // GO:0023019 // GO:0032962 // GO:0035589 // GO:0042312 // GO:0042755 // GO:0043270 // GO:0043270 // GO:0045944 // GO:0046887 // GO:0051100 // GO:0060406 // GO:0070374 // GO:0072659	positive regulation of protein phosphorylation // adenosine receptor signaling pathway // signal transduction // G-protein coupled receptor signaling pathway // G-protein coupled receptor signaling pathway // adenylate cyclase-inhibiting G-protein coupled receptor signaling pathway // elevation of cytosolic calcium ion concentration // response to mechanical stimulus // regulation of receptor act…	GO:0005739 // GO:0005886 // GO:0005886 // GO:0014069 // GO:0016020 // GO:0016021 // GO:0016323 // GO:0016324 // GO:0030425 // GO:0044297 // GO:0045211	mitochondrion // plasma membrane // plasma membrane // postsynaptic density // membrane // integral to membrane // basolateral plasma membrane // apical plasma membrane // dendrite // cell body // postsynaptic membrane	GO:0004871 // GO:0004872 // GO:0004930 // GO:0005524 // GO:0031686 // GO:0043531 // GO:0045028 // GO:0045031 // GO:0045032 // GO:0046982 // GO:0097110	signal transducer activity // receptor activity // G-protein coupled receptor activity // ATP binding // A1 adenosine receptor binding // ADP binding // G-protein coupled purinergic nucleotide receptor activity // ATP-activated nucleotide receptor activity // ADP-activated nucleotide receptor activity // protein heterodimerization activity // scaffold protein binding	GenMAPP // GenMAPP	GPCRDB_Class_A_Rhodopsin-like // Nucleotide_GPCRs
10492341	-0.820516	0.00028445	Arhgef26	NM_001081295	RefSeq	Mus musculus Rho guanine nucleotide exchange factor (GEF) 26 (Arhgef26), mRNA.	FALSE	GO:0008150	biological_process	GO:0005575	cellular_component	GO:0003674	molecular_function	---	---
10492436	-0.608652	0.00292738	---	GENSCAN00000024900	ENSEMBL	cdna:genscan chromosome:NCBIM37:3:65329548:65675858:1 transcript_biotype:protein_coding	FALSE	---	---	---	---	---	---	---	---
10495649	-0.958889	0.00280553	Gm10652	AK156232	GenBank HTC	Mus musculus activated spleen cDNA, RIKEN full-length enriched library, clone:F830012P10 product:hypothetical protein, full insert sequence.	FALSE	GO:0008150	biological_process	GO:0005575	cellular_component	GO:0003674	molecular_function	---	---
10498413	-0.608959	0.000442729	9330121J05Rik	AK033940	GenBank HTC	Mus musculus adult male diencephalon cDNA, RIKEN full-length enriched library, clone:9330121J05 product:hypothetical protein, full insert sequence.	FALSE	---	---	---	---	---	---	---	---
10499655	-1.01407	0.000897874	Il6ra	NM_010559	RefSeq	Mus musculus interleukin 6 receptor, alpha (Il6ra), mRNA.	FALSE	GO:0008284 // GO:0010536 // GO:0016049 // GO:0019221 // GO:0031018 // GO:0032722 // GO:0032755 // GO:0032966 // GO:0034097 // GO:0042517 // GO:0043410 // GO:0045768 // GO:0046427 // GO:0048661 // GO:0050731 // GO:0070102 // GO:0070102 // GO:0070120	positive regulation of cell proliferation // positive regulation of activation of Janus kinase activity // cell growth // cytokine-mediated signaling pathway // endocrine pancreas development // positive regulation of chemokine production // positive regulation of interleukin-6 production // negative regulation of collagen biosynthetic process // response to cytokine stimulus // positive regulati…	GO:0005576 // GO:0005615 // GO:0005896 // GO:0009986 // GO:0016020 // GO:0016021 // GO:0016324 // GO:0032809	extracellular region // extracellular space // interleukin-6 receptor complex // cell surface // membrane // integral to membrane // apical plasma membrane // neuronal cell body membrane	GO:0004872 // GO:0004896 // GO:0004915 // GO:0004915 // GO:0019899 // GO:0019981 // GO:0019981 // GO:0042803 // GO:0070119	receptor activity // cytokine receptor activity // interleukin-6 receptor activity // interleukin-6 receptor activity // enzyme binding // interleukin-6 binding // interleukin-6 binding // protein homodimerization activity // ciliary neurotrophic factor binding	---	---
10500272	-4.16012	2.22875e-07	Gm129	BC132471	GenBank	Mus musculus gene model 129, (NCBI), mRNA (cDNA clone MGC:164102 IMAGE:40130748), complete cds.	FALSE	GO:0008150	biological_process	GO:0005575	cellular_component	GO:0003674	molecular_function	---	---
10502050	-0.881739	0.000242387	Alpk1	NM_027808	RefSeq	Mus musculus alpha-kinase 1 (Alpk1), mRNA.	FALSE	GO:0006468 // GO:0008150 // GO:0016310	protein phosphorylation // biological_process // phosphorylation	GO:0005575	cellular_component	GO:0003674 // GO:0004674 // GO:0005524 // GO:0016301 // GO:0016740 // GO:0016772	molecular_function // protein serine/threonine kinase activity // ATP binding // kinase activity // transferase activity // transferase activity, transferring phosphorus-containing groups	---	---
10504164	-2.58955	1.88564e-06	Ccl27b	NM_001199959	RefSeq	Mus musculus chemokine (C-C motif) ligand 27b (Ccl27b), transcript variant 2, mRNA.	FALSE	---	---	---	---	---	---	---	---
10504194	-2.58955	1.88564e-06	Ccl27b	NM_001199959	RefSeq	Mus musculus chemokine (C-C motif) ligand 27b (Ccl27b), transcript variant 2, mRNA.	FALSE	---	---	---	---	---	---	---	---
10504203	-0.827382	0.000761564	---	ENSMUST00000068158	ENSEMBL	cdna:known chromosome:NCBIM37:4:42749077:42858868:1 gene:ENSMUSG00000054885 gene_biotype:protein_coding transcript_biotype:protein_coding	FALSE	---	---	---	---	---	---	---	---
10504670	-0.706197	0.0020317	E230008N13Rik	NM_198660	RefSeq	Mus musculus RIKEN cDNA E230008N13 gene (E230008N13Rik), mRNA.	FALSE	GO:0008150	biological_process	GO:0005575	cellular_component	GO:0003674	molecular_function	---	---
10506269	-0.868325	0.00128695	Ak4	NM_001177602	RefSeq	Mus musculus adenylate kinase 4 (Ak4), nuclear gene encoding mitochondrial protein, transcript variant 1, mRNA.	FALSE	GO:0006139 // GO:0016310 // GO:0046033 // GO:0046034 // GO:0046039 // GO:0046939	nucleobase-containing compound metabolic process // phosphorylation // AMP metabolic process // ATP metabolic process // GTP metabolic process // nucleotide phosphorylation	GO:0005739 // GO:0005739 // GO:0005759	mitochondrion // mitochondrion // mitochondrial matrix	GO:0000166 // GO:0004017 // GO:0005524 // GO:0005525 // GO:0016301 // GO:0016740 // GO:0016776 // GO:0019201 // GO:0019205 // GO:0046899	nucleotide binding // adenylate kinase activity // ATP binding // GTP binding // kinase activity // transferase activity // phosphotransferase activity, phosphate group as acceptor // nucleotide kinase activity // nucleobase-containing compound kinase activity // nucleoside triphosphate adenylate kinase activity	---	---
10508992	-0.873855	0.00251463	Paqr7	ENSMUST00000081525	ENSEMBL	cdna:known chromosome:NCBIM37:4:134052612:134064728:1 gene:ENSMUSG00000037348 gene_biotype:protein_coding transcript_biotype:protein_coding	FALSE	GO:0007275 // GO:0030154 // GO:0048477	multicellular organismal development // cell differentiation // oogenesis	GO:0005886 // GO:0016020 // GO:0016021	plasma membrane // membrane // integral to membrane	GO:0004872 // GO:0005496 // GO:0008289	receptor activity // steroid binding // lipid binding	---	---
10512315	-2.47992	5.33132e-07	Ccl27a	ENSMUST00000108036	ENSEMBL	cdna:known chromosome:NCBIM37:4:41716340:41720970:-1 gene:ENSMUSG00000073888 gene_biotype:protein_coding transcript_biotype:protein_coding	FALSE	GO:0008150	biological_process	---	---	GO:0005125 // GO:0005515	cytokine activity // protein binding	---	---
10516064	-1.49667	0.000291068	Mfsd2a	NM_029662	RefSeq	Mus musculus major facilitator superfamily domain containing 2A (Mfsd2a), mRNA.	FALSE	GO:0006810	transport	GO:0005783 // GO:0005886 // GO:0016020 // GO:0016021	endoplasmic reticulum // plasma membrane // membrane // integral to membrane	---	---	---	---
10517312	-0.698934	0.00138249	Tmem57	NM_025382	RefSeq	Mus musculus transmembrane protein 57 (Tmem57), mRNA.	FALSE	GO:0008150	biological_process	GO:0005634 // GO:0016020 // GO:0016021 // GO:0031965 // GO:0042995 // GO:0044306 // GO:0044456	nucleus // membrane // integral to membrane // nuclear membrane // cell projection // neuron projection terminus // synapse part	GO:0003674	molecular_function	---	---
10517587	-1.12829	5.89139e-06	Alpl	NM_007431	RefSeq	Mus musculus alkaline phosphatase, liver/bone/kidney (Alpl), mRNA.	FALSE	GO:0001958 // GO:0003006 // GO:0008152 // GO:0016311 // GO:0016311 // GO:0046677 // GO:0051384 // GO:0071407	endochondral ossification // developmental process involved in reproduction // metabolic process // dephosphorylation // dephosphorylation // response to antibiotic // response to glucocorticoid stimulus // cellular response to organic cyclic compound	GO:0005615 // GO:0005886 // GO:0005886 // GO:0016020 // GO:0031225 // GO:0044420	extracellular space // plasma membrane // plasma membrane // membrane // anchored to membrane // extracellular matrix part	GO:0003824 // GO:0004035 // GO:0004035 // GO:0016462 // GO:0016462 // GO:0016787 // GO:0016791 // GO:0046872	catalytic activity // alkaline phosphatase activity // alkaline phosphatase activity // pyrophosphatase activity // pyrophosphatase activity // hydrolase activity // phosphatase activity // metal ion binding	---	---
10518069	-0.947828	8.85276e-05	Efhd2	NM_025994	RefSeq	Mus musculus EF hand domain containing 2 (Efhd2), mRNA.	FALSE	---	---	---	---	GO:0005509 // GO:0005515	calcium ion binding // protein binding	---	---
10518781	-2.7559	7.49748e-07	Per3	NM_011067	RefSeq	Mus musculus period homolog 3 (Drosophila) (Per3), mRNA.	FALSE	GO:0000122 // GO:0006351 // GO:0006355 // GO:0007165 // GO:0007623 // GO:0048511	negative regulation of transcription from RNA polymerase II promoter // transcription, DNA-dependent // regulation of transcription, DNA-dependent // signal transduction // circadian rhythm // rhythmic process	GO:0005634 // GO:0005737	nucleus // cytoplasm	GO:0004871 // GO:0005515	signal transducer activity // protein binding	---	---
10522335	-0.714237	0.000300774	Atp10d	NM_153389	RefSeq	Mus musculus ATPase, class V, type 10D (Atp10d), mRNA.	FALSE	GO:0006200 // GO:0006812 // GO:0015914	ATP catabolic process // cation transport // phospholipid transport	GO:0005739 // GO:0005783 // GO:0005886 // GO:0016020 // GO:0016021	mitochondrion // endoplasmic reticulum // plasma membrane // membrane // integral to membrane	GO:0000166 // GO:0000287 // GO:0004012 // GO:0005524 // GO:0015662 // GO:0016787 // GO:0016820 // GO:0046872	nucleotide binding // magnesium ion binding // phospholipid-translocating ATPase activity // ATP binding // ATPase activity, coupled to transmembrane movement of ions, phosphorylative mechanism // hydrolase activity // hydrolase activity, acting on acid anhydrides, catalyzing transmembrane movement of substances // metal ion binding	---	---
10526356	-0.728627	0.000167197	Rhbdd2	NM_146002	RefSeq	Mus musculus rhomboid domain containing 2 (Rhbdd2), mRNA.	FALSE	GO:0008150	biological_process	GO:0005575 // GO:0016020 // GO:0016021	cellular_component // membrane // integral to membrane	GO:0003674 // GO:0004252	molecular_function // serine-type endopeptidase activity	---	---
10526363	-1.55966	0.000166183	Por	NM_008898	RefSeq	Mus musculus P450 (cytochrome) oxidoreductase (Por), mRNA.	FALSE	GO:0003420 // GO:0018393 // GO:0019395 // GO:0032332 // GO:0032770 // GO:0043066 // GO:0043154 // GO:0043602 // GO:0045542 // GO:0045880 // GO:0046210 // GO:0055114 // GO:0055114 // GO:0060192 // GO:0070988 // GO:0090031 // GO:0090181 // GO:0090346	regulation of growth plate cartilage chondrocyte proliferation // internal peptidyl-lysine acetylation // fatty acid oxidation // positive regulation of chondrocyte differentiation // positive regulation of monooxygenase activity // negative regulation of apoptotic process // negative regulation of cysteine-type endopeptidase activity involved in apoptotic process // nitrate catabolic process // …	GO:0005624 // GO:0005739 // GO:0005783 // GO:0005792 // GO:0016020	membrane fraction // mitochondrion // endoplasmic reticulum // microsome // membrane	GO:0003958 // GO:0004128 // GO:0005506 // GO:0009055 // GO:0010181 // GO:0016491 // GO:0016787 // GO:0019899 // GO:0047726 // GO:0050660 // GO:0050661	NADPH-hemoprotein reductase activity // cytochrome-b5 reductase activity // iron ion binding // electron carrier activity // FMN binding // oxidoreductase activity // hydrolase activity // enzyme binding // iron-cytochrome-c reductase activity // flavin adenine dinucleotide binding // NADP binding	---	---
10526943	-0.625115	0.00198892	Gpr146	NM_001038703	RefSeq	Mus musculus G protein-coupled receptor 146 (Gpr146), transcript variant 2, mRNA.	FALSE	GO:0007165 // GO:0007186 // GO:0008150	signal transduction // G-protein coupled receptor signaling pathway // biological_process	GO:0005575 // GO:0005886 // GO:0016020 // GO:0016021	cellular_component // plasma membrane // membrane // integral to membrane	GO:0003674 // GO:0004871 // GO:0004872 // GO:0004930	molecular_function // signal transducer activity // receptor activity // G-protein coupled receptor activity	GenMAPP	GPCRDB_Other
10529052	-0.804972	0.00182911	Slc5a6	NM_001177621	RefSeq	Mus musculus solute carrier family 5 (sodium-dependent vitamin transporter), member 6 (Slc5a6), transcript variant 1, mRNA.	FALSE	GO:0006810 // GO:0006811 // GO:0006814 // GO:0015878 // GO:0015887 // GO:0055085	transport // ion transport // sodium ion transport // biotin transport // pantothenate transmembrane transport // transmembrane transport	GO:0012506 // GO:0016020 // GO:0016021 // GO:0031526	vesicle membrane // membrane // integral to membrane // brush border membrane	GO:0005215 // GO:0008523 // GO:0015293	transporter activity // sodium-dependent multivitamin transmembrane transporter activity // symporter activity	---	---
10533256	-0.636832	0.00107051	Oas1a	NM_145211	RefSeq	Mus musculus 2'-5' oligoadenylate synthetase 1A (Oas1a), mRNA.	FALSE	GO:0006164 // GO:0006955 // GO:0048525	purine nucleotide biosynthetic process // immune response // negative regulation of viral reproduction	GO:0005634	nucleus	GO:0000166 // GO:0001730 // GO:0001730 // GO:0003723 // GO:0003725 // GO:0005515 // GO:0005524 // GO:0016740 // GO:0016779	nucleotide binding // 2'-5'-oligoadenylate synthetase activity // 2'-5'-oligoadenylate synthetase activity // RNA binding // double-stranded RNA binding // protein binding // ATP binding // transferase activity // nucleotidyltransferase activity	---	---
10533993	-0.63168	0.00217785	Slc15a4	NM_133895	RefSeq	Mus musculus solute carrier family 15, member 4 (Slc15a4), mRNA.	FALSE	GO:0006810 // GO:0006857 // GO:0015031 // GO:0015817 // GO:0015833	transport // oligopeptide transport // protein transport // histidine transport // peptide transport	GO:0016020 // GO:0016021	membrane // integral to membrane	GO:0005215 // GO:0005290 // GO:0015293	transporter activity // L-histidine transmembrane transporter activity // symporter activity	---	---
10538571	-0.589266	0.000982624	Vmn1r10	NM_053231	RefSeq	Mus musculus vomeronasal 1 receptor 10 (Vmn1r10), mRNA.	FALSE	GO:0007606	sensory perception of chemical stimulus	GO:0005575	cellular_component	GO:0004872	receptor activity	---	---
10538936	-0.88934	0.00141289	---	---	---	---	---	---	---	---	---	---	---	---	---
10540472	-0.92803	0.00115991	Bhlhe40	NM_011498	RefSeq	Mus musculus basic helix-loop-helix family, member e40 (Bhlhe40), mRNA.	FALSE	GO:0000122 // GO:0000122 // GO:0006351 // GO:0006355 // GO:0006357 // GO:0006366 // GO:0009649 // GO:0032922 // GO:0032922 // GO:0043153 // GO:0043433 // GO:0045892	negative regulation of transcription from RNA polymerase II promoter // negative regulation of transcription from RNA polymerase II promoter // transcription, DNA-dependent // regulation of transcription, DNA-dependent // regulation of transcription from RNA polymerase II promoter // transcription from RNA polymerase II promoter // entrainment of circadian clock // circadian regulation of gene ex…	GO:0005634 // GO:0005634 // GO:0005730 // GO:0005794	nucleus // nucleus // nucleolus // Golgi apparatus	GO:0000981 // GO:0001078 // GO:0001078 // GO:0001102 // GO:0001191 // GO:0003677 // GO:0003705 // GO:0005515 // GO:0019904 // GO:0042803 // GO:0043425 // GO:0043426 // GO:0046982 // GO:0046982 // GO:0070888 // GO:0070888	sequence-specific DNA binding RNA polymerase II transcription factor activity // RNA polymerase II core promoter proximal region sequence-specific DNA binding transcription factor activity involved in negative regulation of transcription // RNA polymerase II core promoter proximal region sequence-specific DNA binding transcription factor activity involved in negative regulation of transcription /…	---	---
10544417	-0.68345	0.000535804	Epha1	NM_023580	RefSeq	Mus musculus Eph receptor A1 (Epha1), mRNA.	FALSE	GO:0001525 // GO:0001954 // GO:0006468 // GO:0006469 // GO:0007155 // GO:0007166 // GO:0007169 // GO:0008284 // GO:0016310 // GO:0018108 // GO:0030335 // GO:0030336 // GO:0032314 // GO:0032862 // GO:0034446 // GO:0045766 // GO:0046777 // GO:0048013 // GO:0051496	angiogenesis // positive regulation of cell-matrix adhesion // protein phosphorylation // negative regulation of protein kinase activity // cell adhesion // cell surface receptor signaling pathway // transmembrane receptor protein tyrosine kinase signaling pathway // positive regulation of cell proliferation // phosphorylation // peptidyl-tyrosine phosphorylation // positive regulation of cell mi…	GO:0005886 // GO:0005887 // GO:0016020 // GO:0016021	plasma membrane // integral to plasma membrane // membrane // integral to membrane	GO:0000166 // GO:0004672 // GO:0004713 // GO:0004714 // GO:0004872 // GO:0005003 // GO:0005005 // GO:0005524 // GO:0016301 // GO:0016740 // GO:0016772 // GO:0019901	nucleotide binding // protein kinase activity // protein tyrosine kinase activity // transmembrane receptor protein tyrosine kinase activity // receptor activity // ephrin receptor activity // transmembrane-ephrin receptor activity // ATP binding // kinase activity // transferase activity // transferase activity, transferring phosphorus-containing groups // protein kinase binding	---	---
10549655	-0.612984	0.00478572	Eps8l1	ENSMUST00000171445	ENSEMBL	cdna:putative chromosome:NCBIM37:7:4412317:4431006:1 gene:ENSMUSG00000006154 gene_biotype:protein_coding transcript_biotype:protein_coding	FALSE	GO:0016601	Rac protein signal transduction	GO:0001726 // GO:0005737	ruffle // cytoplasm	GO:0051015	actin filament binding	---	---
10553092	-3.17042	1.04077e-05	Dbp	NM_016974	RefSeq	Mus musculus D site albumin promoter binding protein (Dbp), mRNA.	FALSE	GO:0006351 // GO:0006355 // GO:0006355 // GO:0007623 // GO:0045944 // GO:0048511	transcription, DNA-dependent // regulation of transcription, DNA-dependent // regulation of transcription, DNA-dependent // circadian rhythm // positive regulation of transcription from RNA polymerase II promoter // rhythmic process	GO:0005634	nucleus	GO:0000977 // GO:0001077 // GO:0003677 // GO:0003700 // GO:0043565 // GO:0046983	RNA polymerase II regulatory region sequence-specific DNA binding // RNA polymerase II core promoter proximal region sequence-specific DNA binding transcription factor activity involved in positive regulation of transcription // DNA binding // sequence-specific DNA binding transcription factor activity // sequence-specific DNA binding // protein dimerization activity	---	---
10556266	-2.44566	5.6621e-06	Wee1	NM_009516	RefSeq	Mus musculus WEE 1 homolog 1 (S. pombe) (Wee1), mRNA.	FALSE	GO:0000226 // GO:0006468 // GO:0006468 // GO:0007049 // GO:0007067 // GO:0016310 // GO:0018108 // GO:0030010 // GO:0048812 // GO:0048812 // GO:0051301	microtubule cytoskeleton organization // protein phosphorylation // protein phosphorylation // cell cycle // mitosis // phosphorylation // peptidyl-tyrosine phosphorylation // establishment of cell polarity // neuron projection morphogenesis // neuron projection morphogenesis // cell division	GO:0005634 // GO:0005737	nucleus // cytoplasm	GO:0000166 // GO:0000287 // GO:0004672 // GO:0004674 // GO:0004713 // GO:0004715 // GO:0005515 // GO:0005524 // GO:0016301 // GO:0016740 // GO:0016772 // GO:0046872	nucleotide binding // magnesium ion binding // protein kinase activity // protein serine/threonine kinase activity // protein tyrosine kinase activity // non-membrane spanning protein tyrosine kinase activity // protein binding // ATP binding // kinase activity // transferase activity // transferase activity, transferring phosphorus-containing groups // metal ion binding	GenMAPP // GenMAPP	Cell_Cycle_KEGG // G1_to_S_cell_cycle_Reactome
10558961	-0.775597	0.000107254	Tspan4	NM_053082	RefSeq	Mus musculus tetraspanin 4 (Tspan4), transcript variant 1, mRNA.	FALSE	---	---	GO:0016020 // GO:0016021	membrane // integral to membrane	GO:0005515	protein binding	---	---
10564290	-1.12152	4.23329e-06	Klf13	NM_021366	RefSeq	Mus musculus Kruppel-like factor 13 (Klf13), mRNA.	FALSE	GO:0006351 // GO:0006355 // GO:0006357 // GO:0006357 // GO:0006366 // GO:0008285 // GO:0045647 // GO:0045944	transcription, DNA-dependent // regulation of transcription, DNA-dependent // regulation of transcription from RNA polymerase II promoter // regulation of transcription from RNA polymerase II promoter // transcription from RNA polymerase II promoter // negative regulation of cell proliferation // negative regulation of erythrocyte differentiation // positive regulation of transcription from RNA p…	GO:0005622 // GO:0005634	intracellular // nucleus	GO:0003676 // GO:0003677 // GO:0003677 // GO:0008270 // GO:0046872	nucleic acid binding // DNA binding // DNA binding // zinc ion binding // metal ion binding	---	---
10565609	-1.47848	5.02889e-05	Thrsp	NM_009381	RefSeq	Mus musculus thyroid hormone responsive SPOT14 homolog (Rattus) (Thrsp), mRNA.	FALSE	GO:0006351 // GO:0006355 // GO:0008610 // GO:0010866 // GO:0046890 // GO:0046890	transcription, DNA-dependent // regulation of transcription, DNA-dependent // lipid biosynthetic process // regulation of triglyceride biosynthetic process // regulation of lipid biosynthetic process // regulation of lipid biosynthetic process	GO:0005634 // GO:0005737 // GO:0005829	nucleus // cytoplasm // cytosol	GO:0005515 // GO:0042803	protein binding // protein homodimerization activity	---	---
10565727	-2.33115	1.64587e-05	Tsku	NM_001168541	RefSeq	Mus musculus tsukushi (Tsku), transcript variant 1, mRNA.	FALSE	GO:0008150	biological_process	GO:0005575 // GO:0005576	cellular_component // extracellular region	GO:0003674	molecular_function	---	---
10567335	-0.65292	0.00086448	Gde1	NM_019580	RefSeq	Mus musculus glycerophosphodiester phosphodiesterase 1 (Gde1), mRNA.	FALSE	GO:0006071 // GO:0006629 // GO:0007186 // GO:0008152	glycerol metabolic process // lipid metabolic process // G-protein coupled receptor signaling pathway // metabolic process	GO:0005737 // GO:0005887 // GO:0016020 // GO:0016021	cytoplasm // integral to plasma membrane // membrane // integral to membrane	GO:0008081 // GO:0008889 // GO:0016787 // GO:0046872 // GO:0047395	phosphoric diester hydrolase activity // glycerophosphodiester phosphodiesterase activity // hydrolase activity // metal ion binding // glycerophosphoinositol glycerophosphodiesterase activity	---	---
10569513	-0.925066	0.000818246	Osbpl5	NM_024289	RefSeq	Mus musculus oxysterol binding protein-like 5 (Osbpl5), transcript variant 1, mRNA.	FALSE	GO:0006810 // GO:0006869	transport // lipid transport	GO:0005783 // GO:0016020 // GO:0016021	endoplasmic reticulum // membrane // integral to membrane	GO:0005543 // GO:0008289	phospholipid binding // lipid binding	---	---
10574087	-0.816401	8.18339e-05	Herpud1	NM_022331	RefSeq	Mus musculus homocysteine-inducible, endoplasmic reticulum stress-inducible, ubiquitin-like domain member 1 (Herpud1), mRNA.	FALSE	GO:0006511 // GO:0006511 // GO:0006874 // GO:0006950 // GO:0006986 // GO:0030968 // GO:0031396 // GO:0032092 // GO:0043154	ubiquitin-dependent protein catabolic process // ubiquitin-dependent protein catabolic process // cellular calcium ion homeostasis // response to stress // response to unfolded protein // endoplasmic reticulum unfolded protein response // regulation of protein ubiquitination // positive regulation of protein binding // negative regulation of cysteine-type endopeptidase activity involved in apopto…	GO:0005783 // GO:0005789 // GO:0005789 // GO:0016020 // GO:0016021	endoplasmic reticulum // endoplasmic reticulum membrane // endoplasmic reticulum membrane // membrane // integral to membrane	GO:0005515	protein binding	GenMAPP	Circadian_Exercise
10574976	-0.662205	0.00401922	Pla2g15	NM_133792	RefSeq	Mus musculus phospholipase A2, group XV (Pla2g15), mRNA.	FALSE	GO:0006629 // GO:0006631 // GO:0006672 // GO:0046470	lipid metabolic process // fatty acid metabolic process // ceramide metabolic process // phosphatidylcholine metabolic process	GO:0005576 // GO:0005739 // GO:0005764 // GO:0043231	extracellular region // mitochondrion // lysosome // intracellular membrane-bounded organelle	GO:0004622 // GO:0008374 // GO:0016740 // GO:0016746 // GO:0016787 // GO:0047499 // GO:0047499	lysophospholipase activity // O-acyltransferase activity // transferase activity // transferase activity, transferring acyl groups // hydrolase activity // calcium-independent phospholipase A2 activity // calcium-independent phospholipase A2 activity	---	---
10577237	-0.675334	0.00428361	BB014433	NR_037972	RefSeq	Mus musculus expressed sequence BB014433 (BB014433), non-coding RNA.	FALSE	GO:0008150	biological_process	GO:0005575	cellular_component	GO:0003674	molecular_function	---	---
10579952	-2.11357	1.16499e-05	---	---	---	---	---	---	---	---	---	---	---	---	---
10581069	-0.841431	0.00323571	Cmtm4	NM_153582	RefSeq	Mus musculus CKLF-like MARVEL transmembrane domain containing 4 (Cmtm4), mRNA.	FALSE	GO:0006935 // GO:0008150	chemotaxis // biological_process	GO:0005575 // GO:0005615 // GO:0016020 // GO:0016021	cellular_component // extracellular space // membrane // integral to membrane	GO:0003674 // GO:0005125	molecular_function // cytokine activity	---	---
10582231	-0.68014	0.00196945	Fbxo31	NM_133765	RefSeq	Mus musculus F-box protein 31 (Fbxo31), mRNA.	FALSE	GO:0006974 // GO:0007049 // GO:0008054 // GO:0031146 // GO:0031571	response to DNA damage stimulus // cell cycle // cyclin catabolic process // SCF-dependent proteasomal ubiquitin-dependent protein catabolic process // mitotic cell cycle G1/S transition DNA damage checkpoint	GO:0019005	SCF ubiquitin ligase complex	GO:0030332	cyclin binding	---	---
10584634	-3.89527	1.23789e-08	Usp2	NM_198092	RefSeq	Mus musculus ubiquitin specific peptidase 2 (Usp2), transcript variant 3, mRNA.	FALSE	GO:0000122 // GO:0006508 // GO:0006511 // GO:0007049 // GO:0007517 // GO:0016579 // GO:0045931 // GO:0048642 // GO:0048643 // GO:0050821	negative regulation of transcription from RNA polymerase II promoter // proteolysis // ubiquitin-dependent protein catabolic process // cell cycle // muscle organ development // protein deubiquitination // positive regulation of mitotic cell cycle // negative regulation of skeletal muscle tissue development // positive regulation of skeletal muscle tissue development // protein stabilization	GO:0005634 // GO:0005737 // GO:0005813 // GO:0005938 // GO:0048471 // GO:0048471	nucleus // cytoplasm // centrosome // cell cortex // perinuclear region of cytoplasm // perinuclear region of cytoplasm	GO:0004221 // GO:0008233 // GO:0008234 // GO:0016787 // GO:0030332 // GO:0031625 // GO:0042802 // GO:0046872	ubiquitin thiolesterase activity // peptidase activity // cysteine-type peptidase activity // hydrolase activity // cyclin binding // ubiquitin protein ligase binding // identical protein binding // metal ion binding	---	---
10584741	-0.710363	9.55702e-05	Slc37a4	NM_008063	RefSeq	Mus musculus solute carrier family 37 (glucose-6-phosphate transporter), member 4 (Slc37a4), mRNA.	FALSE	GO:0001780 // GO:0001816 // GO:0002318 // GO:0005977 // GO:0006089 // GO:0006641 // GO:0006874 // GO:0008202 // GO:0014070 // GO:0015760 // GO:0015760 // GO:0015760 // GO:0015760 // GO:0030593 // GO:0032682 // GO:0035166 // GO:0042593 // GO:0042593 // GO:0042632 // GO:0043085 // GO:0045730	neutrophil homeostasis // cytokine production // myeloid progenitor cell differentiation // glycogen metabolic process // lactate metabolic process // triglyceride metabolic process // cellular calcium ion homeostasis // steroid metabolic process // response to organic cyclic compound // glucose-6-phosphate transport // glucose-6-phosphate transport // glucose-6-phosphate transport // glucose-6-p…	GO:0005792 // GO:0030176	microsome // integral to endoplasmic reticulum membrane	GO:0015152	glucose-6-phosphate transmembrane transporter activity	---	---
10585186	-0.637527	0.00134641	1600029D21Rik	NM_029639	RefSeq	Mus musculus RIKEN cDNA 1600029D21 gene (1600029D21Rik), mRNA.	FALSE	---	---	GO:0009897 // GO:0016020 // GO:0016021	external side of plasma membrane // membrane // integral to membrane	---	---	---	---
10587350	-0.774029	0.00407726	Ddx43	NM_001191044	RefSeq	Mus musculus DEAD (Asp-Glu-Ala-Asp) box polypeptide 43 (Ddx43), mRNA.	FALSE	GO:0008150 // GO:0008152	biological_process // metabolic process	GO:0005622	intracellular	GO:0000166 // GO:0003674 // GO:0004386 // GO:0005524 // GO:0016787	nucleotide binding // molecular_function // helicase activity // ATP binding // hydrolase activity	---	---
10588522	-0.661463	0.00119125	Rrp9	NM_145620	RefSeq	Mus musculus RRP9, small subunit (SSU) processome component, homolog (yeast) (Rrp9), mRNA.	FALSE	GO:0006364 // GO:0008150	rRNA processing // biological_process	GO:0005634 // GO:0030529	nucleus // ribonucleoprotein complex	GO:0003674 // GO:0003723	molecular_function // RNA binding	---	---
10590135	-0.918599	0.00107417	---	ENSMUST00000093527	ENSEMBL	cdna:known chromosome:NCBIM37:9:119068279:119070787:1 gene:ENSMUSG00000074029 gene_biotype:protein_coding transcript_biotype:protein_coding	FALSE	---	---	---	---	---	---	---	---
10591967	-0.658131	0.00371576	Jam3	NM_023277	RefSeq	Mus musculus junction adhesion molecule 3 (Jam3), mRNA.	FALSE	GO:0001525 // GO:0001525 // GO:0001780 // GO:0002250 // GO:0002318 // GO:0002523 // GO:0007155 // GO:0007155 // GO:0007155 // GO:0007160 // GO:0007160 // GO:0007283 // GO:0007286 // GO:0016477 // GO:0019226 // GO:0030010 // GO:0042552 // GO:0090022 // GO:0090138	angiogenesis // angiogenesis // neutrophil homeostasis // adaptive immune response // myeloid progenitor cell differentiation // leukocyte migration involved in inflammatory response // cell adhesion // cell adhesion // cell adhesion // cell-matrix adhesion // cell-matrix adhesion // spermatogenesis // spermatid development // cell migration // transmission of nerve impulse // establishment of ce…	GO:0005576 // GO:0005615 // GO:0005886 // GO:0005911 // GO:0005923 // GO:0009986 // GO:0016020 // GO:0016021 // GO:0030054 // GO:0030057 // GO:0033010 // GO:0043220 // GO:0044291	extracellular region // extracellular space // plasma membrane // cell-cell junction // tight junction // cell surface // membrane // integral to membrane // cell junction // desmosome // paranodal junction // Schmidt-Lanterman incisure // cell-cell contact zone	GO:0005178 // GO:0005178 // GO:0005515 // GO:0042803 // GO:0046982	integrin binding // integrin binding // protein binding // protein homodimerization activity // protein heterodimerization activity	---	---
10593233	-0.677582	0.00184176	Htr3a	NM_013561	RefSeq	Mus musculus 5-hydroxytryptamine (serotonin) receptor 3A (Htr3a), transcript variant 1, mRNA.	FALSE	GO:0006810 // GO:0006811 // GO:0007210	transport // ion transport // serotonin receptor signaling pathway	GO:0005737 // GO:0005886 // GO:0016020 // GO:0016021 // GO:0030054 // GO:0030424 // GO:0043025 // GO:0045202 // GO:0045211	cytoplasm // plasma membrane // membrane // integral to membrane // cell junction // axon // neuronal cell body // synapse // postsynaptic membrane	GO:0004872 // GO:0004993 // GO:0005216 // GO:0005230 // GO:0005232 // GO:0005249 // GO:0051378	receptor activity // serotonin receptor activity // ion channel activity // extracellular ligand-gated ion channel activity // serotonin-activated cation-selective channel activity // voltage-gated potassium channel activity // serotonin binding	---	---
10593776	-1.57124	0.00241466	Nrg4	NM_032002	RefSeq	Mus musculus neuregulin 4 (Nrg4), mRNA.	FALSE	---	---	GO:0005576 // GO:0005625 // GO:0005886 // GO:0016020 // GO:0016021	extracellular region // soluble fraction // plasma membrane // membrane // integral to membrane	GO:0008083	growth factor activity	---	---
10596454	-2.11302	4.17438e-05	Alas1	NM_020559	RefSeq	Mus musculus aminolevulinic acid synthase 1 (Alas1), nuclear gene encoding mitochondrial protein, mRNA.	FALSE	GO:0006778 // GO:0006783 // GO:0008152 // GO:0009058 // GO:0033014	porphyrin-containing compound metabolic process // heme biosynthetic process // metabolic process // biosynthetic process // tetrapyrrole biosynthetic process	GO:0005634 // GO:0005737 // GO:0005739 // GO:0005739 // GO:0005759	nucleus // cytoplasm // mitochondrion // mitochondrion // mitochondrial matrix	GO:0003824 // GO:0003870 // GO:0016740 // GO:0016746 // GO:0030170	catalytic activity // 5-aminolevulinate synthase activity // transferase activity // transferase activity, transferring acyl groups // pyridoxal phosphate binding	---	---
10596737	-1.26039	0.000900343	Gnat1	NM_008140	RefSeq	Mus musculus guanine nucleotide binding protein, alpha transducing 1 (Gnat1), mRNA.	FALSE	GO:0001580 // GO:0006184 // GO:0006184 // GO:0006184 // GO:0007165 // GO:0007186 // GO:0007186 // GO:0007188 // GO:0007199 // GO:0007601 // GO:0007601 // GO:0007602 // GO:0007603 // GO:0008283 // GO:0009586 // GO:0009642 // GO:0042462 // GO:0050896 // GO:0050908 // GO:0050908 // GO:0050917 // GO:0051343 // GO:0060041 // GO:0071257	detection of chemical stimulus involved in sensory perception of bitter taste // GTP catabolic process // GTP catabolic process // GTP catabolic process // signal transduction // G-protein coupled receptor signaling pathway // G-protein coupled receptor signaling pathway // adenylate cyclase-modulating G-protein coupled receptor signaling pathway // G-protein coupled receptor signaling pathway co…	GO:0001750 // GO:0001750 // GO:0001917 // GO:0005737 // GO:0005834 // GO:0005834 // GO:0005834 // GO:0016020 // GO:0016324 // GO:0031234 // GO:0032391 // GO:0043025	photoreceptor outer segment // photoreceptor outer segment // photoreceptor inner segment // cytoplasm // heterotrimeric G-protein complex // heterotrimeric G-protein complex // heterotrimeric G-protein complex // membrane // apical plasma membrane // extrinsic to internal side of plasma membrane // photoreceptor connecting cilium // neuronal cell body	GO:0000166 // GO:0001664 // GO:0003924 // GO:0003924 // GO:0003924 // GO:0004871 // GO:0005515 // GO:0005525 // GO:0019001 // GO:0031683 // GO:0046872	nucleotide binding // G-protein coupled receptor binding // GTPase activity // GTPase activity // GTPase activity // signal transducer activity // protein binding // GTP binding // guanyl nucleotide binding // G-protein beta/gamma-subunit complex binding // metal ion binding	---	---
10599279	-0.804816	0.00457691	---	ENSMUST00000083154	ENSEMBL	ncrna:snoRNA chromosome:NCBIM37:X:34913824:34913966:1 gene:ENSMUSG00000065088 gene_biotype:snoRNA transcript_biotype:snoRNA	FALSE	---	---	---	---	---	---	---	---
10603469	-0.760101	0.00440884	Rbm3	NM_001166409	RefSeq	Mus musculus RNA binding motif protein 3 (Rbm3), transcript variant 2, mRNA.	FALSE	GO:0006412 // GO:0006417 // GO:0006950 // GO:0009409 // GO:0035196 // GO:0045727	translation // regulation of translation // response to stress // response to cold // production of miRNAs involved in gene silencing by miRNA // positive regulation of translation	GO:0005634 // GO:0005737 // GO:0015934 // GO:0030425 // GO:0042995	nucleus // cytoplasm // large ribosomal subunit // dendrite // cell projection	GO:0000166 // GO:0003676 // GO:0003723 // GO:0043023	nucleotide binding // nucleic acid binding // RNA binding // ribosomal large subunit binding	---	---
10604139	-0.804816	0.00457691	---	ENSMUST00000083154	ENSEMBL	ncrna:snoRNA chromosome:NCBIM37:X:34913824:34913966:1 gene:ENSMUSG00000065088 gene_biotype:snoRNA transcript_biotype:snoRNA	FALSE	---	---	---	---	---	---	---	---
10604141	-0.804816	0.00457691	---	ENSMUST00000083154	ENSEMBL	ncrna:snoRNA chromosome:NCBIM37:X:34913824:34913966:1 gene:ENSMUSG00000065088 gene_biotype:snoRNA transcript_biotype:snoRNA	FALSE	---	---	---	---	---	---	---	---
10606989	-0.592043	0.00448723	Tsc22d3	NM_001077364	RefSeq	Mus musculus TSC22 domain family, member 3 (Tsc22d3), transcript variant 1, mRNA.	FALSE	GO:0000122 // GO:0006355 // GO:0006916 // GO:0006970 // GO:0048642	negative regulation of transcription from RNA polymerase II promoter // regulation of transcription, DNA-dependent // anti-apoptosis // response to osmotic stress // negative regulation of skeletal muscle tissue development	GO:0005634 // GO:0005737	nucleus // cytoplasm	GO:0003700 // GO:0043426	sequence-specific DNA binding transcription factor activity // MRF binding	---	---

## Sheet: down.SAvsWT
Table S2: Lists of genes differentially expressed between wildtype (WT), Rassf1a-/- Sav1+/+ (RA), Rassf1a+/+ Sav1+/- (SA) and Rassf1a-/- Sav1+/- (RA_SA) mouse livers
ID	SA.vs.WT.FC	SA.vs.WT.p	Gene.Symbol	mRNA.Accession	mRNA..Source	mRna...Description	mRNA...xhyb	GO.Biological.Process.ID	GO.Biological.Process.Term	GO.Cellular.Component.ID	GO.Cellular.Component.Term	GO.Molecular.Function.ID	GO.Molecular.Function.Term	Pathway.Source	Pathway.Name
10338211	-3.0011	0.00480835	---	---	---	---	---	---	---	---	---	---	---	---	---
10338322	-0.695522	0.000860862	---	---	---	---	---	---	---	---	---	---	---	---	---
10339817	-2.68457	0.000960638	---	---	---	---	---	---	---	---	---	---	---	---	---
10340926	-0.808171	0.000613627	---	---	---	---	---	---	---	---	---	---	---	---	---
10341370	-0.692113	0.00366316	---	---	---	---	---	---	---	---	---	---	---	---	---
10343315	-2.34562	0.00309652	---	---	---	---	---	---	---	---	---	---	---	---	---
10343427	-0.636234	0.000652398	---	---	---	---	---	---	---	---	---	---	---	---	---
10343523	-0.997907	0.000758408	---	---	---	---	---	---	---	---	---	---	---	---	---
10344172	-1.53799	0.00281416	---	---	---	---	---	---	---	---	---	---	---	---	---
10344456	-0.787841	0.00179805	---	---	---	---	---	---	---	---	---	---	---	---	---
10344464	-0.607775	0.00490823	---	---	---	---	---	---	---	---	---	---	---	---	---
10348234	-1.06194	0.000159187	Neu2	ENSMUST00000165109	ENSEMBL	cdna:known chromosome:NCBIM37:1:89491125:89494396:1 gene:ENSMUSG00000079434 gene_biotype:protein_coding transcript_biotype:protein_coding	FALSE	GO:0008152 // GO:0010831 // GO:0045663	metabolic process // positive regulation of myotube differentiation // positive regulation of myoblast differentiation	GO:0005737 // GO:0005829	cytoplasm // cytosol	GO:0004308 // GO:0016787 // GO:0016798 // GO:0052794 // GO:0052795 // GO:0052796	exo-alpha-sialidase activity // hydrolase activity // hydrolase activity, acting on glycosyl bonds // exo-alpha-(2->3)-sialidase activity // exo-alpha-(2->6)-sialidase activity // exo-alpha-(2->8)-sialidase activity	---	---
10349744	-0.938493	0.00143455	Slc45a3	NM_145977	RefSeq	Mus musculus solute carrier family 45, member 3 (Slc45a3), mRNA.	FALSE	GO:0006810 // GO:0008150 // GO:0055085	transport // biological_process // transmembrane transport	GO:0005575 // GO:0016020 // GO:0016021	cellular_component // membrane // integral to membrane	GO:0003674	molecular_function	---	---
10349904	-0.638555	0.000355319	Golt1a	NM_026680	RefSeq	Mus musculus golgi transport 1 homolog A (S. cerevisiae) (Golt1a), mRNA.	FALSE	GO:0006810 // GO:0008150 // GO:0015031 // GO:0016192	transport // biological_process // protein transport // vesicle-mediated transport	GO:0005575 // GO:0005794 // GO:0016020 // GO:0016021	cellular_component // Golgi apparatus // membrane // integral to membrane	GO:0003674	molecular_function	---	---
10353038	-1.78791	0.000909562	Ppp1r42	NM_145692	RefSeq	Mus musculus protein phosphatase 1, regulatory subunit 42 (Ppp1r42), transcript variant 2, mRNA.	FALSE	GO:0010921	regulation of phosphatase activity	GO:0002177 // GO:0005737 // GO:0005813 // GO:0005815 // GO:0005856 // GO:0015630	manchette // cytoplasm // centrosome // microtubule organizing center // cytoskeleton // microtubule cytoskeleton	GO:0003779 // GO:0005515 // GO:0015631 // GO:0045502	actin binding // protein binding // tubulin binding // dynein binding	---	---
10357239	-0.643079	0.00181308	Tmem37	NM_019432	RefSeq	Mus musculus transmembrane protein 37 (Tmem37), mRNA.	FALSE	GO:0006810 // GO:0006811 // GO:0006816 // GO:0034765 // GO:0070588	transport // ion transport // calcium ion transport // regulation of ion transmembrane transport // calcium ion transmembrane transport	GO:0016020 // GO:0016021	membrane // integral to membrane	GO:0005216 // GO:0005244 // GO:0005262	ion channel activity // voltage-gated ion channel activity // calcium channel activity	---	---
10360454	-0.723204	0.00280043	Opn3	NM_010098	RefSeq	Mus musculus opsin 3 (Opn3), mRNA.	FALSE	GO:0007165 // GO:0007186 // GO:0007601 // GO:0007602 // GO:0018298 // GO:0050896	signal transduction // G-protein coupled receptor signaling pathway // visual perception // phototransduction // protein-chromophore linkage // response to stimulus	GO:0016020 // GO:0016021	membrane // integral to membrane	GO:0004871 // GO:0004872 // GO:0004930 // GO:0009881	signal transducer activity // receptor activity // G-protein coupled receptor activity // photoreceptor activity	GenMAPP	GPCRDB_Class_A_Rhodopsin-like
10363528	-0.726528	0.00232358	Aifm2	NM_001039194	RefSeq	Mus musculus apoptosis-inducing factor, mitochondrion-associated 2 (Aifm2), nuclear gene encoding mitochondrial protein, transcript variant 3, mRNA.	FALSE	GO:0006917 // GO:0030261 // GO:0055114	induction of apoptosis // chromosome condensation // oxidation-reduction process	GO:0005737 // GO:0005739 // GO:0005739 // GO:0005741 // GO:0005811 // GO:0005829 // GO:0016020 // GO:0016021	cytoplasm // mitochondrion // mitochondrion // mitochondrial outer membrane // lipid particle // cytosol // membrane // integral to membrane	GO:0003677 // GO:0004174 // GO:0016491 // GO:0050660	DNA binding // electron-transferring-flavoprotein dehydrogenase activity // oxidoreductase activity // flavin adenine dinucleotide binding	---	---
10364548	-0.661654	0.0016626	C030046I01Rik	NM_177994	RefSeq	Mus musculus RIKEN cDNA C030046I01 gene (C030046I01Rik), mRNA.	FALSE	GO:0008150	biological_process	GO:0005575 // GO:0005634	cellular_component // nucleus	GO:0003674 // GO:0003676	molecular_function // nucleic acid binding	---	---
10365482	-0.606585	0.00180058	Timp3	NM_011595	RefSeq	Mus musculus tissue inhibitor of metalloproteinase 3 (Timp3), mRNA.	FALSE	GO:0045861 // GO:0051045 // GO:0071310	negative regulation of proteolysis // negative regulation of membrane protein ectodomain proteolysis // cellular response to organic substance	GO:0005576 // GO:0005578 // GO:0005604 // GO:0005737	extracellular region // proteinaceous extracellular matrix // basement membrane // cytoplasm	GO:0004857 // GO:0008191 // GO:0046872	enzyme inhibitor activity // metalloendopeptidase inhibitor activity // metal ion binding	GenMAPP	Matrix_Metalloproteinases
10374739	-1.20592	0.00020165	4933427E13Rik	NR_045853	RefSeq	Mus musculus RIKEN cDNA 4933427E13 gene (4933427E13Rik), non-coding RNA.	FALSE	---	---	---	---	---	---	---	---
10376956	-0.975698	4.16318e-05	Hs3st3a1	NM_178870	RefSeq	Mus musculus heparan sulfate (glucosamine) 3-O-sulfotransferase 3A1 (Hs3st3a1), mRNA.	FALSE	GO:0008150	biological_process	GO:0005575 // GO:0005794 // GO:0016020 // GO:0016021	cellular_component // Golgi apparatus // membrane // integral to membrane	GO:0003674 // GO:0008146 // GO:0008467 // GO:0016740	molecular_function // sulfotransferase activity // [heparan sulfate]-glucosamine 3-sulfotransferase 1 activity // transferase activity	---	---
10378082	-1.07717	0.000737893	Ggt6	NM_027819	RefSeq	Mus musculus gamma-glutamyltransferase 6 (Ggt6), mRNA.	FALSE	GO:0006750 // GO:0008150	glutathione biosynthetic process // biological_process	GO:0005575 // GO:0016020 // GO:0016021	cellular_component // membrane // integral to membrane	GO:0003674 // GO:0003840 // GO:0016740 // GO:0016746 // GO:0016787	molecular_function // gamma-glutamyltransferase activity // transferase activity // transferase activity, transferring acyl groups // hydrolase activity	---	---
10379006	-0.607362	0.000368616	Dhrs13	NM_183286	RefSeq	Mus musculus dehydrogenase/reductase (SDR family) member 13 (Dhrs13), mRNA.	FALSE	GO:0008152 // GO:0055114	metabolic process // oxidation-reduction process	GO:0005576	extracellular region	GO:0000166 // GO:0016491	nucleotide binding // oxidoreductase activity	---	---
10383289	-0.70651	0.000342667	Baiap2	NM_130862	RefSeq	Mus musculus brain-specific angiogenesis inhibitor 1-associated protein 2 (Baiap2), transcript variant 2, mRNA.	FALSE	GO:0007165 // GO:0007266 // GO:0009617 // GO:0016358 // GO:0032956 // GO:0046847 // GO:0048167 // GO:0051017	signal transduction // Rho protein signal transduction // response to bacterium // dendrite development // regulation of actin cytoskeleton organization // filopodium assembly // regulation of synaptic plasticity // actin filament bundle assembly	GO:0005634 // GO:0005737 // GO:0005829 // GO:0005856 // GO:0005886 // GO:0016020 // GO:0019717 // GO:0030054 // GO:0042995	nucleus // cytoplasm // cytosol // cytoskeleton // plasma membrane // membrane // synaptosome // cell junction // cell projection	GO:0005515 // GO:0008093 // GO:0017124 // GO:0070064	protein binding // cytoskeletal adaptor activity // SH3 domain binding // proline-rich region binding	---	---
10393047	-0.76255	0.000121435	Galk1	NM_016905	RefSeq	Mus musculus galactokinase 1 (Galk1), mRNA.	FALSE	GO:0006012 // GO:0006012 // GO:0006012 // GO:0016310 // GO:0019402 // GO:0046835 // GO:0046835	galactose metabolic process // galactose metabolic process // galactose metabolic process // phosphorylation // galactitol metabolic process // carbohydrate phosphorylation // carbohydrate phosphorylation	GO:0005737	cytoplasm	GO:0000166 // GO:0004335 // GO:0004335 // GO:0005515 // GO:0005524 // GO:0005534 // GO:0016301 // GO:0016740	nucleotide binding // galactokinase activity // galactokinase activity // protein binding // ATP binding // galactose binding // kinase activity // transferase activity	---	---
10393904	-0.683908	0.00126281	Notum	NM_175263	RefSeq	Mus musculus notum pectinacetylesterase homolog (Drosophila) (Notum), mRNA.	FALSE	GO:0008150	biological_process	GO:0005575 // GO:0005576	cellular_component // extracellular region	GO:0003674 // GO:0016787	molecular_function // hydrolase activity	---	---
10394018	-0.815221	0.00135131	Ccdc57	NM_027745	RefSeq	Mus musculus coiled-coil domain containing 57 (Ccdc57), mRNA.	FALSE	GO:0008150	biological_process	GO:0005575	cellular_component	GO:0003674	molecular_function	---	---
10397148	-1.34422	0.00316426	Acot1	NM_012006	RefSeq	Mus musculus acyl-CoA thioesterase 1 (Acot1), mRNA.	FALSE	GO:0001676 // GO:0006629 // GO:0006637	long-chain fatty acid metabolic process // lipid metabolic process // acyl-CoA metabolic process	GO:0005737 // GO:0005739 // GO:0005829	cytoplasm // mitochondrion // cytosol	GO:0004091 // GO:0016290 // GO:0016787 // GO:0016790 // GO:0047617 // GO:0047617 // GO:0047617	carboxylesterase activity // palmitoyl-CoA hydrolase activity // hydrolase activity // thiolester hydrolase activity // acyl-CoA hydrolase activity // acyl-CoA hydrolase activity // acyl-CoA hydrolase activity	---	---
10398996	-0.642476	0.00173057	Crip2	NM_024223	RefSeq	Mus musculus cysteine rich protein 2 (Crip2), mRNA.	FALSE	GO:0008284 // GO:0030097	positive regulation of cell proliferation // hemopoiesis	GO:0005938	cell cortex	GO:0005515 // GO:0008270 // GO:0046872	protein binding // zinc ion binding // metal ion binding	---	---
10400795	-0.895527	0.000167649	Sav1	NM_022028	RefSeq	Mus musculus salvador homolog 1 (Drosophila) (Sav1), mRNA.	FALSE	GO:0001942 // GO:0007165 // GO:0030216 // GO:0030216 // GO:0035329 // GO:0035329 // GO:0043065 // GO:0046620 // GO:0050680 // GO:0060044 // GO:0060412 // GO:0060487 // GO:0060575 // GO:2000036	hair follicle development // signal transduction // keratinocyte differentiation // keratinocyte differentiation // hippo signaling cascade // hippo signaling cascade // positive regulation of apoptotic process // regulation of organ growth // negative regulation of epithelial cell proliferation // negative regulation of cardiac muscle cell proliferation // ventricular septum morphogenesis // lun…	GO:0005634 // GO:0005737	nucleus // cytoplasm	---	---	---	---
10404059	-0.833619	0.000948813	Hist1h1c	NM_015786	RefSeq	Mus musculus histone cluster 1, H1c (Hist1h1c), mRNA.	FALSE	GO:0006334 // GO:0016584	nucleosome assembly // nucleosome positioning	GO:0000786 // GO:0005634 // GO:0005694	nucleosome // nucleus // chromosome	GO:0003677 // GO:0005515	DNA binding // protein binding	---	---
10407072	-1.38269	0.00237032	Elovl7	NM_029001	RefSeq	Mus musculus ELOVL family member 7, elongation of long chain fatty acids (yeast) (Elovl7), mRNA.	FALSE	GO:0006633 // GO:0008610 // GO:0019367 // GO:0034626 // GO:0042761	fatty acid biosynthetic process // lipid biosynthetic process // fatty acid elongation, saturated fatty acid // fatty acid elongation, polyunsaturated fatty acid // very long-chain fatty acid biosynthetic process	GO:0005783 // GO:0016020 // GO:0016021	endoplasmic reticulum // membrane // integral to membrane	GO:0016740	transferase activity	---	---
10408212	-0.65286	0.00358171	---	---	---	---	---	---	---	---	---	---	---	---	---
10418341	-0.829749	0.0013768	Il17rb	NM_019583	RefSeq	Mus musculus interleukin 17 receptor B (Il17rb), mRNA.	FALSE	GO:0019221	cytokine-mediated signaling pathway	GO:0005576 // GO:0005737 // GO:0005886 // GO:0005887 // GO:0009986 // GO:0016020 // GO:0016021	extracellular region // cytoplasm // plasma membrane // integral to plasma membrane // cell surface // membrane // integral to membrane	GO:0004872 // GO:0004896	receptor activity // cytokine receptor activity	---	---
10419867	-0.685535	0.00380985	Homez	NM_183174	RefSeq	Mus musculus homeodomain leucine zipper-encoding gene (Homez), transcript variant 2, mRNA.	FALSE	GO:0006351 // GO:0006355	transcription, DNA-dependent // regulation of transcription, DNA-dependent	GO:0005634 // GO:0005634	nucleus // nucleus	GO:0003677 // GO:0003700 // GO:0043565	DNA binding // sequence-specific DNA binding transcription factor activity // sequence-specific DNA binding	---	---
10422946	-0.920954	0.00409171	Ranbp3l	NM_198024	RefSeq	Mus musculus RAN binding protein 3-like (Ranbp3l), mRNA.	FALSE	GO:0008150 // GO:0046907	biological_process // intracellular transport	GO:0005575	cellular_component	GO:0003674	molecular_function	---	---
10423575	-1.13651	0.00217282	---	---	---	---	---	---	---	---	---	---	---	---	---
10424979	-0.589146	0.00248512	Gpt	NM_182805	RefSeq	Mus musculus glutamic pyruvic transaminase, soluble (Gpt), mRNA.	FALSE	GO:0009058	biosynthetic process	GO:0005737	cytoplasm	GO:0003824 // GO:0004021 // GO:0008483 // GO:0016740 // GO:0030170	catalytic activity // L-alanine:2-oxoglutarate aminotransferase activity // transaminase activity // transferase activity // pyridoxal phosphate binding	---	---
10425158	-0.732496	0.00490752	Pdxp	NM_020271	RefSeq	Mus musculus pyridoxal (pyridoxine, vitamin B6) phosphatase (Pdxp), mRNA.	FALSE	GO:0006470 // GO:0007088 // GO:0008152 // GO:0030836 // GO:0031247 // GO:0032465 // GO:0071318	protein dephosphorylation // regulation of mitosis // metabolic process // positive regulation of actin filament depolymerization // actin rod assembly // regulation of cytokinesis // cellular response to ATP	GO:0005737 // GO:0005829 // GO:0005856 // GO:0005886 // GO:0016020 // GO:0042995	cytoplasm // cytosol // cytoskeleton // plasma membrane // membrane // cell projection	GO:0004647 // GO:0004721 // GO:0016787 // GO:0016791 // GO:0031072 // GO:0033883 // GO:0046872	phosphoserine phosphatase activity // phosphoprotein phosphatase activity // hydrolase activity // phosphatase activity // heat shock protein binding // pyridoxal phosphatase activity // metal ion binding	---	---
10432939	-1.56978	0.00100314	Csad	NM_144942	RefSeq	Mus musculus cysteine sulfinic acid decarboxylase (Csad), mRNA.	FALSE	GO:0019452 // GO:0019530 // GO:0019752	L-cysteine catabolic process to taurine // taurine metabolic process // carboxylic acid metabolic process	GO:0005575	cellular_component	GO:0003824 // GO:0004782 // GO:0016829 // GO:0016831 // GO:0030170	catalytic activity // sulfinoalanine decarboxylase activity // lyase activity // carboxy-lyase activity // pyridoxal phosphate binding	GenMAPP	mRNA_processing_binding_Reactome
10436983	-0.598273	0.00111031	Dopey2	NM_027293	RefSeq	Mus musculus dopey family member 2 (Dopey2), transcript variant 1, mRNA.	FALSE	GO:0006810 // GO:0008150 // GO:0015031	transport // biological_process // protein transport	GO:0005575	cellular_component	GO:0003674	molecular_function	---	---
10439130	-0.592422	0.00115085	Umps	NM_009471	RefSeq	Mus musculus uridine monophosphate synthetase (Umps), mRNA.	FALSE	GO:0006207 // GO:0006221 // GO:0006222 // GO:0008152 // GO:0009116 // GO:0044205	'de novo' pyrimidine base biosynthetic process // pyrimidine nucleotide biosynthetic process // UMP biosynthetic process // metabolic process // nucleoside metabolic process // 'de novo' UMP biosynthetic process	GO:0005625 // GO:0005634 // GO:0005737	soluble fraction // nucleus // cytoplasm	GO:0003824 // GO:0004588 // GO:0004590 // GO:0016740 // GO:0016757 // GO:0016829 // GO:0016831	catalytic activity // orotate phosphoribosyltransferase activity // orotidine-5'-phosphate decarboxylase activity // transferase activity // transferase activity, transferring glycosyl groups // lyase activity // carboxy-lyase activity	---	---
10439411	-0.703691	9.33272e-05	Nr1i2	NM_010936	RefSeq	Mus musculus nuclear receptor subfamily 1, group I, member 2 (Nr1i2), transcript variant 1, mRNA.	FALSE	GO:0006351 // GO:0006355 // GO:0006805 // GO:0010628 // GO:0030522 // GO:0042738 // GO:0042908 // GO:0043401 // GO:0045892 // GO:0045893 // GO:0046618	transcription, DNA-dependent // regulation of transcription, DNA-dependent // xenobiotic metabolic process // positive regulation of gene expression // intracellular receptor mediated signaling pathway // exogenous drug catabolic process // xenobiotic transport // steroid hormone mediated signaling pathway // negative regulation of transcription, DNA-dependent // positive regulation of transcript…	GO:0005634	nucleus	GO:0003677 // GO:0003700 // GO:0003707 // GO:0004872 // GO:0004879 // GO:0005515 // GO:0008144 // GO:0008270 // GO:0043565 // GO:0046872	DNA binding // sequence-specific DNA binding transcription factor activity // steroid hormone receptor activity // receptor activity // ligand-activated sequence-specific DNA binding RNA polymerase II transcription factor activity // protein binding // drug binding // zinc ion binding // sequence-specific DNA binding // metal ion binding	GenMAPP	Nuclear_Receptors
10446214	-0.600012	0.00277657	Alkbh7	NM_025538	RefSeq	Mus musculus alkB, alkylation repair homolog 7 (E. coli) (Alkbh7), transcript variant 1, mRNA.	FALSE	GO:0008150 // GO:0055114	biological_process // oxidation-reduction process	GO:0005576 // GO:0005634 // GO:0005737 // GO:0005739	extracellular region // nucleus // cytoplasm // mitochondrion	GO:0016491 // GO:0016702 // GO:0016706 // GO:0046872	oxidoreductase activity // oxidoreductase activity, acting on single donors with incorporation of molecular oxygen, incorporation of two atoms of oxygen // oxidoreductase activity, acting on paired donors, with incorporation or reduction of molecular oxygen, 2-oxoglutarate as one donor, and incorporation of one atom each of oxygen into both donors // metal ion binding	---	---
10447773	-0.782123	0.00172102	Slc22a3	NM_011395	RefSeq	Mus musculus solute carrier family 22 (organic cation transporter), member 3 (Slc22a3), mRNA.	FALSE	GO:0006810 // GO:0006811 // GO:0015695 // GO:0015695 // GO:0015697 // GO:0015697 // GO:0015844 // GO:0015872 // GO:0032098 // GO:0034220 // GO:0034220 // GO:0051608 // GO:0051615 // GO:0055085	transport // ion transport // organic cation transport // organic cation transport // quaternary ammonium group transport // quaternary ammonium group transport // monoamine transport // dopamine transport // regulation of appetite // ion transmembrane transport // ion transmembrane transport // histamine transport // histamine uptake // transmembrane transport	GO:0005887 // GO:0016020 // GO:0016021	integral to plasma membrane // membrane // integral to membrane	GO:0005215 // GO:0005329 // GO:0015075 // GO:0015101 // GO:0015101 // GO:0015651 // GO:0015651 // GO:0019534 // GO:0022857	transporter activity // dopamine transmembrane transporter activity // ion transmembrane transporter activity // organic cation transmembrane transporter activity // organic cation transmembrane transporter activity // quaternary ammonium group transmembrane transporter activity // quaternary ammonium group transmembrane transporter activity // toxin transporter activity // transmembrane transpor…	---	---
10449142	-0.62837	0.000914354	Fam195a	BC024332	GenBank	Mus musculus RIKEN cDNA 9530058B02 gene, mRNA (cDNA clone MGC:35630 IMAGE:5011430), complete cds.	FALSE	GO:0008150	biological_process	GO:0005575	cellular_component	GO:0005515	protein binding	---	---
10454286	-0.682339	0.00391199	Mapre2	NM_153058	RefSeq	Mus musculus microtubule-associated protein, RP/EB family, member 2 (Mapre2), transcript variant 1, mRNA.	FALSE	GO:0007049 // GO:0007067 // GO:0051301	cell cycle // mitosis // cell division	GO:0005737 // GO:0005856 // GO:0005874 // GO:0015630	cytoplasm // cytoskeleton // microtubule // microtubule cytoskeleton	GO:0008017	microtubule binding	---	---
10454953	-0.625238	0.000347051	Tmco6	NM_028036	RefSeq	Mus musculus transmembrane and coiled-coil domains 6 (Tmco6), mRNA.	FALSE	GO:0006606 // GO:0008150	protein import into nucleus // biological_process	GO:0005575 // GO:0005634 // GO:0005737 // GO:0016020 // GO:0016021	cellular_component // nucleus // cytoplasm // membrane // integral to membrane	GO:0008565	protein transporter activity	---	---
10461028	-0.646212	0.000646137	Trpt1	NM_153597	RefSeq	Mus musculus tRNA phosphotransferase 1 (Trpt1), transcript variant 1, mRNA.	FALSE	GO:0006388 // GO:0008033	tRNA splicing, via endonucleolytic cleavage and ligation // tRNA processing	GO:0005575	cellular_component	GO:0000215 // GO:0008665 // GO:0016740 // GO:0016772	tRNA 2'-phosphotransferase activity // 2'-phosphotransferase activity // transferase activity // transferase activity, transferring phosphorus-containing groups	---	---
10462575	-0.676	0.00444987	Lipm	NM_023903	RefSeq	Mus musculus lipase, family member M (Lipm), mRNA.	FALSE	GO:0006629 // GO:0008150 // GO:0016042	lipid metabolic process // biological_process // lipid catabolic process	GO:0005575 // GO:0005576	cellular_component // extracellular region	GO:0003674 // GO:0016787 // GO:0016788	molecular_function // hydrolase activity // hydrolase activity, acting on ester bonds	---	---
10463625	-0.657466	0.00135466	Fbxl15	NM_133694	RefSeq	Mus musculus F-box and leucine-rich repeat protein 15 (Fbxl15), mRNA.	FALSE	GO:0000086 // GO:0016567 // GO:0030282 // GO:0030513 // GO:0031146	G2/M transition of mitotic cell cycle // protein ubiquitination // bone mineralization // positive regulation of BMP signaling pathway // SCF-dependent proteasomal ubiquitin-dependent protein catabolic process	GO:0005737 // GO:0019005	cytoplasm // SCF ubiquitin ligase complex	GO:0003674	molecular_function	---	---
10465580	-0.614321	0.00130701	Nudt22	NM_026675	RefSeq	Mus musculus nudix (nucleoside diphosphate linked moiety X)-type motif 22 (Nudt22), mRNA.	FALSE	GO:0008150 // GO:0008152	biological_process // metabolic process	GO:0005575	cellular_component	GO:0003674 // GO:0016787	molecular_function // hydrolase activity	---	---
10466712	-0.762729	0.0020529	Mamdc2	NM_174857	RefSeq	Mus musculus MAM domain containing 2 (Mamdc2), mRNA.	FALSE	GO:0019800	peptide cross-linking via chondroitin 4-sulfate glycosaminoglycan	GO:0005576 // GO:0005578 // GO:0005614 // GO:0005783 // GO:0016020 // GO:0031012	extracellular region // proteinaceous extracellular matrix // interstitial matrix // endoplasmic reticulum // membrane // extracellular matrix	GO:0005539	glycosaminoglycan binding	---	---
10471018	-0.866324	0.000139584	Fam73b	NM_175392	RefSeq	Mus musculus family with sequence similarity 73, member B (Fam73b), transcript variant 1, mRNA.	FALSE	GO:0008150	biological_process	GO:0005575 // GO:0016020 // GO:0016021	cellular_component // membrane // integral to membrane	GO:0003674	molecular_function	---	---
10471411	-0.647767	0.00378942	Ptges2	NM_133783	RefSeq	Mus musculus prostaglandin E synthase 2 (Ptges2), mRNA.	FALSE	GO:0001516 // GO:0006633 // GO:0008610 // GO:0045454 // GO:0045893 // GO:0046903 // GO:0055114	prostaglandin biosynthetic process // fatty acid biosynthetic process // lipid biosynthetic process // cell redox homeostasis // positive regulation of transcription, DNA-dependent // secretion // oxidation-reduction process	GO:0005634 // GO:0005737 // GO:0005739 // GO:0005739 // GO:0005794 // GO:0005829 // GO:0016020 // GO:0016021	nucleus // cytoplasm // mitochondrion // mitochondrion // Golgi apparatus // cytosol // membrane // integral to membrane	GO:0003677 // GO:0009055 // GO:0015035 // GO:0016853 // GO:0050220	DNA binding // electron carrier activity // protein disulfide oxidoreductase activity // isomerase activity // prostaglandin-E synthase activity	---	---
10473367	-1.16596	2.07918e-05	Slc43a1	NM_001081349	RefSeq	Mus musculus solute carrier family 43, member 1 (Slc43a1), transcript variant 1, mRNA.	FALSE	GO:0003333 // GO:0006810 // GO:0006865 // GO:0015804 // GO:0015807 // GO:0055085	amino acid transmembrane transport // transport // amino acid transport // neutral amino acid transport // L-amino acid transport // transmembrane transport	GO:0016020 // GO:0016021	membrane // integral to membrane	GO:0015175 // GO:0015179	neutral amino acid transmembrane transporter activity // L-amino acid transmembrane transporter activity	---	---
10474181	-0.593427	0.00264216	Abtb2	NM_178890	RefSeq	Mus musculus ankyrin repeat and BTB (POZ) domain containing 2 (Abtb2), mRNA.	FALSE	GO:0008150	biological_process	GO:0005575	cellular_component	GO:0003674 // GO:0003677	molecular_function // DNA binding	---	---
10475946	-0.629915	0.0017771	Zc3h6	NM_178404	RefSeq	Mus musculus zinc finger CCCH type containing 6 (Zc3h6), mRNA.	FALSE	GO:0008150	biological_process	GO:0005575	cellular_component	GO:0003674 // GO:0003676 // GO:0008270 // GO:0046872	molecular_function // nucleic acid binding // zinc ion binding // metal ion binding	---	---
10476952	-0.606762	0.00367039	Entpd6	NM_172117	RefSeq	Mus musculus ectonucleoside triphosphate diphosphohydrolase 6 (Entpd6), mRNA.	FALSE	GO:0032026 // GO:0051592	response to magnesium ion // response to calcium ion	GO:0005615 // GO:0005624 // GO:0005794 // GO:0009986	extracellular space // membrane fraction // Golgi apparatus // cell surface	GO:0008894 // GO:0016787 // GO:0017110 // GO:0017111	guanosine-5'-triphosphate,3'-diphosphate diphosphatase activity // hydrolase activity // nucleoside-diphosphatase activity // nucleoside-triphosphatase activity	---	---
10478854	-0.617206	0.00178928	Slc9a8	NM_148929	RefSeq	Mus musculus solute carrier family 9 (sodium/hydrogen exchanger), member 8 (Slc9a8), transcript variant 1, mRNA.	FALSE	GO:0006810 // GO:0006811 // GO:0006812 // GO:0006813 // GO:0006814 // GO:0006885 // GO:0015992 // GO:0051453 // GO:0055085 // GO:0071436	transport // ion transport // cation transport // potassium ion transport // sodium ion transport // regulation of pH // proton transport // regulation of intracellular pH // transmembrane transport // sodium ion export	GO:0005794 // GO:0016020 // GO:0016021	Golgi apparatus // membrane // integral to membrane	GO:0015297 // GO:0015299 // GO:0015385 // GO:0015386	antiporter activity // solute:hydrogen antiporter activity // sodium:hydrogen antiporter activity // potassium:hydrogen antiporter activity	---	---
10480734	-0.881182	0.00319697	Ptgds	NM_008963	RefSeq	Mus musculus prostaglandin D2 synthase (brain) (Ptgds), mRNA.	FALSE	GO:0001516 // GO:0001516 // GO:0006629 // GO:0006633 // GO:0006810 // GO:0008610 // GO:0045187	prostaglandin biosynthetic process // prostaglandin biosynthetic process // lipid metabolic process // fatty acid biosynthetic process // transport // lipid biosynthetic process // regulation of circadian sleep/wake cycle, sleep	GO:0005576 // GO:0005576 // GO:0005615 // GO:0005634 // GO:0005737 // GO:0005783 // GO:0005791 // GO:0005794 // GO:0016020	extracellular region // extracellular region // extracellular space // nucleus // cytoplasm // endoplasmic reticulum // rough endoplasmic reticulum // Golgi apparatus // membrane	GO:0004667 // GO:0004667 // GO:0005215 // GO:0005501 // GO:0005501 // GO:0005504 // GO:0016853 // GO:0036094	prostaglandin-D synthase activity // prostaglandin-D synthase activity // transporter activity // retinoid binding // retinoid binding // fatty acid binding // isomerase activity // small molecule binding	GenMAPP // GenMAPP	Eicosanoid_Synthesis // Prostaglandin_synthesis_regulation
10481474	-0.801022	0.00108627	Crat	NM_007760	RefSeq	Mus musculus carnitine acetyltransferase (Crat), nuclear gene encoding mitochondrial protein, mRNA.	FALSE	GO:0006629 // GO:0006631 // GO:0006810 // GO:0019254	lipid metabolic process // fatty acid metabolic process // transport // carnitine metabolic process, CoA-linked	GO:0005739 // GO:0005739 // GO:0005743 // GO:0005777 // GO:0005783 // GO:0016020	mitochondrion // mitochondrion // mitochondrial inner membrane // peroxisome // endoplasmic reticulum // membrane	GO:0004092 // GO:0005102 // GO:0016740 // GO:0016746	carnitine O-acetyltransferase activity // receptor binding // transferase activity // transferase activity, transferring acyl groups	GenMAPP	Fatty_Acid_Degradation
10488374	-0.697228	0.00247115	Foxa2	NM_010446	RefSeq	Mus musculus forkhead box A2 (Foxa2), mRNA.	FALSE	GO:0000122 // GO:0000432 // GO:0000433 // GO:0001701 // GO:0001705 // GO:0001708 // GO:0006351 // GO:0006355 // GO:0006355 // GO:0006357 // GO:0007275 // GO:0007389 // GO:0007492 // GO:0007596 // GO:0008344 // GO:0009653 // GO:0009952 // GO:0009953 // GO:0010468 // GO:0010719 // GO:0016568 // GO:0021533 // GO:0021533 // GO:0021779 // GO:0021904 // GO:0021904 // GO:0023019 // GO:0030193 // GO:0030…	negative regulation of transcription from RNA polymerase II promoter // positive regulation of transcription from RNA polymerase II promoter by glucose // negative regulation of transcription from RNA polymerase II promoter by glucose // in utero embryonic development // ectoderm formation // cell fate specification // transcription, DNA-dependent // regulation of transcription, DNA-dependent // …	GO:0005634 // GO:0005634 // GO:0005667 // GO:0005737 // GO:0044464	nucleus // nucleus // transcription factor complex // cytoplasm // cell part	GO:0000978 // GO:0001077 // GO:0003677 // GO:0003677 // GO:0003690 // GO:0003700 // GO:0003700 // GO:0003705 // GO:0005515 // GO:0008134 // GO:0008301 // GO:0019900 // GO:0019904 // GO:0043565 // GO:0043565 // GO:0044212 // GO:0046332	RNA polymerase II core promoter proximal region sequence-specific DNA binding // RNA polymerase II core promoter proximal region sequence-specific DNA binding transcription factor activity involved in positive regulation of transcription // DNA binding // DNA binding // double-stranded DNA binding // sequence-specific DNA binding transcription factor activity // sequence-specific DNA binding tran…	---	---
10492330	-0.702471	0.000644588	P2ry1	NM_008772	RefSeq	Mus musculus purinergic receptor P2Y, G-protein coupled 1 (P2ry1), mRNA.	FALSE	GO:0001934 // GO:0001973 // GO:0007165 // GO:0007186 // GO:0007186 // GO:0007193 // GO:0007204 // GO:0009612 // GO:0010469 // GO:0010700 // GO:0019233 // GO:0023019 // GO:0032962 // GO:0035589 // GO:0042312 // GO:0042755 // GO:0043270 // GO:0043270 // GO:0045944 // GO:0046887 // GO:0051100 // GO:0060406 // GO:0070374 // GO:0072659	positive regulation of protein phosphorylation // adenosine receptor signaling pathway // signal transduction // G-protein coupled receptor signaling pathway // G-protein coupled receptor signaling pathway // adenylate cyclase-inhibiting G-protein coupled receptor signaling pathway // elevation of cytosolic calcium ion concentration // response to mechanical stimulus // regulation of receptor act…	GO:0005739 // GO:0005886 // GO:0005886 // GO:0014069 // GO:0016020 // GO:0016021 // GO:0016323 // GO:0016324 // GO:0030425 // GO:0044297 // GO:0045211	mitochondrion // plasma membrane // plasma membrane // postsynaptic density // membrane // integral to membrane // basolateral plasma membrane // apical plasma membrane // dendrite // cell body // postsynaptic membrane	GO:0004871 // GO:0004872 // GO:0004930 // GO:0005524 // GO:0031686 // GO:0043531 // GO:0045028 // GO:0045031 // GO:0045032 // GO:0046982 // GO:0097110	signal transducer activity // receptor activity // G-protein coupled receptor activity // ATP binding // A1 adenosine receptor binding // ADP binding // G-protein coupled purinergic nucleotide receptor activity // ATP-activated nucleotide receptor activity // ADP-activated nucleotide receptor activity // protein heterodimerization activity // scaffold protein binding	GenMAPP // GenMAPP	GPCRDB_Class_A_Rhodopsin-like // Nucleotide_GPCRs
10496494	-0.698173	0.00281758	Tspan5	NM_019571	RefSeq	Mus musculus tetraspanin 5 (Tspan5), mRNA.	FALSE	---	---	GO:0016020 // GO:0016021	membrane // integral to membrane	---	---	---	---
10497481	-1.14818	0.00040413	2810416G20Rik	AK021294	GenBank HTC	Mus musculus 13 days embryo stomach cDNA, RIKEN full-length enriched library, clone:D530019O13 product:hypothetical protein, full insert sequence.	FALSE	GO:0008150	biological_process	GO:0005575	cellular_component	GO:0003674	molecular_function	---	---
10504294	-0.7842	0.000829549	Rusc2	NM_001037709	RefSeq	Mus musculus RUN and SH3 domain containing 2 (Rusc2), transcript variant 2, mRNA.	FALSE	GO:0008150	biological_process	GO:0005575	cellular_component	GO:0003674	molecular_function	---	---
10507594	-0.589896	0.00202471	Slc2a1	NM_011400	RefSeq	Mus musculus solute carrier family 2 (facilitated glucose transporter), member 1 (Slc2a1), mRNA.	FALSE	GO:0006810 // GO:0008643 // GO:0015758 // GO:0015758 // GO:0035428 // GO:0042149 // GO:0042908 // GO:0055085 // GO:0070837 // GO:0070837	transport // carbohydrate transport // glucose transport // glucose transport // hexose transmembrane transport // cellular response to glucose starvation // xenobiotic transport // transmembrane transport // dehydroascorbic acid transport // dehydroascorbic acid transport	GO:0001939 // GO:0005622 // GO:0005737 // GO:0005737 // GO:0005886 // GO:0005886 // GO:0005901 // GO:0005911 // GO:0016020 // GO:0016021 // GO:0016323 // GO:0030496 // GO:0031982	female pronucleus // intracellular // cytoplasm // cytoplasm // plasma membrane // plasma membrane // caveola // cell-cell junction // membrane // integral to membrane // basolateral plasma membrane // midbody // vesicle	GO:0005215 // GO:0005355 // GO:0005515 // GO:0019900 // GO:0022857 // GO:0022891 // GO:0033300 // GO:0033300 // GO:0042802 // GO:0042910 // GO:0055056 // GO:0055056	transporter activity // glucose transmembrane transporter activity // protein binding // kinase binding // transmembrane transporter activity // substrate-specific transmembrane transporter activity // dehydroascorbic acid transporter activity // dehydroascorbic acid transporter activity // identical protein binding // xenobiotic transporter activity // D-glucose transmembrane transporter activit…	---	---
10509163	-0.822296	0.00088026	Id3	NM_008321	RefSeq	Mus musculus inhibitor of DNA binding 3 (Id3), mRNA.	FALSE	GO:0000122 // GO:0000122 // GO:0006275 // GO:0006351 // GO:0007275 // GO:0007507 // GO:0030855 // GO:0043065 // GO:0043433 // GO:0045668 // GO:0045892 // GO:0051726	negative regulation of transcription from RNA polymerase II promoter // negative regulation of transcription from RNA polymerase II promoter // regulation of DNA replication // transcription, DNA-dependent // multicellular organismal development // heart development // epithelial cell differentiation // positive regulation of apoptotic process // negative regulation of sequence-specific DNA bindi…	GO:0005634 // GO:0005737	nucleus // cytoplasm	GO:0003700 // GO:0005515 // GO:0008134 // GO:0019904	sequence-specific DNA binding transcription factor activity // protein binding // transcription factor binding // protein domain specific binding	---	---
10509927	-0.604795	0.00100508	4921514A10Rik	AK132662	GenBank HTC	Mus musculus adult male testis cDNA, RIKEN full-length enriched library, clone:4921514A10 product:hypothetical protein, full insert sequence.	FALSE	---	---	---	---	---	---	---	---
10510982	-0.677259	0.000583501	Pex10	NM_001042407	RefSeq	Mus musculus peroxisomal biogenesis factor 10 (Pex10), mRNA.	FALSE	GO:0007031 // GO:0016558	peroxisome organization // protein import into peroxisome matrix	GO:0005777 // GO:0005778 // GO:0005779 // GO:0016020	peroxisome // peroxisomal membrane // integral to peroxisomal membrane // membrane	GO:0008022 // GO:0008270 // GO:0046872	protein C-terminus binding // zinc ion binding // metal ion binding	---	---
10515335	-0.935011	0.00411285	C530005A16Rik	NR_029450	RefSeq	Mus musculus RIKEN cDNA C530005A16 gene (C530005A16Rik), non-coding RNA.	FALSE	GO:0008150	biological_process	GO:0005575	cellular_component	GO:0003674	molecular_function	GenMAPP	Electron_Transport_Chain
10517587	-0.987243	2.60936e-05	Alpl	NM_007431	RefSeq	Mus musculus alkaline phosphatase, liver/bone/kidney (Alpl), mRNA.	FALSE	GO:0001958 // GO:0003006 // GO:0008152 // GO:0016311 // GO:0016311 // GO:0046677 // GO:0051384 // GO:0071407	endochondral ossification // developmental process involved in reproduction // metabolic process // dephosphorylation // dephosphorylation // response to antibiotic // response to glucocorticoid stimulus // cellular response to organic cyclic compound	GO:0005615 // GO:0005886 // GO:0005886 // GO:0016020 // GO:0031225 // GO:0044420	extracellular space // plasma membrane // plasma membrane // membrane // anchored to membrane // extracellular matrix part	GO:0003824 // GO:0004035 // GO:0004035 // GO:0016462 // GO:0016462 // GO:0016787 // GO:0016791 // GO:0046872	catalytic activity // alkaline phosphatase activity // alkaline phosphatase activity // pyrophosphatase activity // pyrophosphatase activity // hydrolase activity // phosphatase activity // metal ion binding	---	---
10517609	-1.02945	0.0010264	Cda	NM_028176	RefSeq	Mus musculus cytidine deaminase (Cda), mRNA.	FALSE	GO:0008152 // GO:0009972 // GO:0030308 // GO:0045980 // GO:0051289	metabolic process // cytidine deamination // negative regulation of cell growth // negative regulation of nucleotide metabolic process // protein homotetramerization	GO:0005829	cytosol	GO:0001882 // GO:0003824 // GO:0004126 // GO:0008270 // GO:0016787 // GO:0042802 // GO:0042803 // GO:0046872	nucleoside binding // catalytic activity // cytidine deaminase activity // zinc ion binding // hydrolase activity // identical protein binding // protein homodimerization activity // metal ion binding	---	---
10518372	-0.859994	0.00103735	Miip	NM_001025365	RefSeq	Mus musculus migration and invasion inhibitory protein (Miip), mRNA.	FALSE	GO:0008150	biological_process	GO:0005575	cellular_component	GO:0003674	molecular_function	---	---
10524020	-0.658456	0.000806701	Tmem175	NM_001163531	RefSeq	Mus musculus transmembrane protein 175 (Tmem175), transcript variant 2, mRNA.	FALSE	GO:0008150	biological_process	GO:0005575 // GO:0016020 // GO:0016021	cellular_component // membrane // integral to membrane	GO:0003674	molecular_function	---	---
10526345	-0.641881	0.0024135	Nsun5	NM_145414	RefSeq	Mus musculus NOL1/NOP2/Sun domain family, member 5 (Nsun5), mRNA.	FALSE	GO:0008150 // GO:0032259	biological_process // methylation	GO:0005575	cellular_component	GO:0003674 // GO:0008168 // GO:0016740	molecular_function // methyltransferase activity // transferase activity	---	---
10526356	-0.826241	4.73527e-05	Rhbdd2	NM_146002	RefSeq	Mus musculus rhomboid domain containing 2 (Rhbdd2), mRNA.	FALSE	GO:0008150	biological_process	GO:0005575 // GO:0016020 // GO:0016021	cellular_component // membrane // integral to membrane	GO:0003674 // GO:0004252	molecular_function // serine-type endopeptidase activity	---	---
10531931	-1.2786	0.000676081	Sparcl1	NM_010097	RefSeq	Mus musculus SPARC-like 1 (Sparcl1), mRNA.	FALSE	GO:0007165	signal transduction	GO:0005576 // GO:0005578 // GO:0005615 // GO:0045202	extracellular region // proteinaceous extracellular matrix // extracellular space // synapse	GO:0005509	calcium ion binding	---	---
10534966	-0.641085	0.00434445	Zfp113	NM_019747	RefSeq	Mus musculus zinc finger protein 113 (Zfp113), mRNA.	FALSE	GO:0008150	biological_process	GO:0005634	nucleus	GO:0042802 // GO:0046872	identical protein binding // metal ion binding	---	---
10535213	-0.634436	0.00413985	Snx8	NM_172277	RefSeq	Mus musculus sorting nexin 8 (Snx8), mRNA.	FALSE	GO:0006810 // GO:0006886 // GO:0007154 // GO:0015031 // GO:0034498	transport // intracellular protein transport // cell communication // protein transport // early endosome to Golgi transport	GO:0005622 // GO:0005768 // GO:0016020 // GO:0031901	intracellular // endosome // membrane // early endosome membrane	GO:0008289 // GO:0035091	lipid binding // phosphatidylinositol binding	---	---
10539143	-0.781071	0.0012335	Retsat	NM_026159	RefSeq	Mus musculus retinol saturase (all trans retinol 13,14 reductase) (Retsat), mRNA.	FALSE	GO:0042572 // GO:0055114	retinol metabolic process // oxidation-reduction process	GO:0005640 // GO:0005783 // GO:0005789 // GO:0016020 // GO:0031965	nuclear outer membrane // endoplasmic reticulum // endoplasmic reticulum membrane // membrane // nuclear membrane	GO:0016491 // GO:0051786	oxidoreductase activity // all-trans-retinol 13,14-reductase activity	---	---
10546244	-0.603	0.00109408	Chst13	NM_027928	RefSeq	Mus musculus carbohydrate (chondroitin 4) sulfotransferase 13 (Chst13), mRNA.	FALSE	GO:0030206	chondroitin sulfate biosynthetic process	GO:0005575	cellular_component	GO:0001537 // GO:0047756	N-acetylgalactosamine 4-O-sulfotransferase activity // chondroitin 4-sulfotransferase activity	---	---
10547396	-0.999096	0.00012705	Wnt5b	NM_009525	RefSeq	Mus musculus wingless-related MMTV integration site 5B (Wnt5b), mRNA.	FALSE	GO:0000122 // GO:0001525 // GO:0002062 // GO:0007165 // GO:0007223 // GO:0007267 // GO:0007275 // GO:0009887 // GO:0009950 // GO:0009952 // GO:0016055 // GO:0030335 // GO:0031018 // GO:0042074 // GO:0045600 // GO:0060027 // GO:0060028 // GO:0060541 // GO:0090090	negative regulation of transcription from RNA polymerase II promoter // angiogenesis // chondrocyte differentiation // signal transduction // Wnt receptor signaling pathway, calcium modulating pathway // cell-cell signaling // multicellular organismal development // organ morphogenesis // dorsal/ventral axis specification // anterior/posterior pattern specification // Wnt receptor signaling pathw…	GO:0005576 // GO:0005578 // GO:0005615 // GO:0005886 // GO:0009986 // GO:0031012	extracellular region // proteinaceous extracellular matrix // extracellular space // plasma membrane // cell surface // extracellular matrix	GO:0005102 // GO:0005102 // GO:0005110 // GO:0005515	receptor binding // receptor binding // frizzled-2 binding // protein binding	---	---
10549733	-0.652818	0.000895863	A430110N23Rik	NM_173008	RefSeq	Mus musculus RIKEN cDNA A430110N23 gene (A430110N23Rik), mRNA.	FALSE	GO:0008150	biological_process	GO:0005576 // GO:0016020	extracellular region // membrane	GO:0004872 // GO:0005044	receptor activity // scavenger receptor activity	---	---
10551487	-0.719937	0.00071174	Eid2b	NM_001177427	RefSeq	Mus musculus EP300 interacting inhibitor of differentiation 2B (Eid2b), mRNA.	FALSE	GO:0008150	biological_process	GO:0005575	cellular_component	GO:0003674	molecular_function	---	---
10552156	-0.627413	0.000925043	Rhpn2	NM_027897	RefSeq	Mus musculus rhophilin, Rho GTPase binding protein 2 (Rhpn2), mRNA.	FALSE	GO:0007165 // GO:0008150	signal transduction // biological_process	GO:0005575 // GO:0005622 // GO:0005737	cellular_component // intracellular // cytoplasm	GO:0003674	molecular_function	---	---
10558825	-0.682439	0.00221545	Lrrc56	NM_001172064	RefSeq	Mus musculus leucine rich repeat containing 56 (Lrrc56), transcript variant 1, mRNA.	FALSE	GO:0008150	biological_process	GO:0005575	cellular_component	GO:0003674	molecular_function	---	---
10559270	-0.676867	0.00496353	Tssc4	NM_020285	RefSeq	Mus musculus tumor-suppressing subchromosomal transferable fragment 4 (Tssc4), transcript variant 1, mRNA.	FALSE	GO:0008150	biological_process	GO:0005575	cellular_component	GO:0003674	molecular_function	---	---
10559415	-0.765409	0.000920776	Leng1	NM_027203	RefSeq	Mus musculus leukocyte receptor cluster (LRC) member 1 (Leng1), mRNA.	FALSE	GO:0008150	biological_process	GO:0005575	cellular_component	GO:0003674	molecular_function	---	---
10562419	-0.595745	0.0032938	Lrp3	NM_001024707	RefSeq	Mus musculus low density lipoprotein receptor-related protein 3 (Lrp3), mRNA.	FALSE	GO:0008150	biological_process	GO:0005575	cellular_component	GO:0005515	protein binding	---	---
10567626	-0.620469	0.00153314	Gga2	NM_028758	RefSeq	Mus musculus golgi associated, gamma adaptin ear containing, ARF binding protein 2 (Gga2), mRNA.	FALSE	GO:0006810 // GO:0006886 // GO:0015031 // GO:0016192	transport // intracellular protein transport // protein transport // vesicle-mediated transport	GO:0005622 // GO:0005768 // GO:0005794 // GO:0005802 // GO:0016020 // GO:0030131 // GO:0030136 // GO:0044431	intracellular // endosome // Golgi apparatus // trans-Golgi network // membrane // clathrin adaptor complex // clathrin-coated vesicle // Golgi apparatus part	GO:0005515 // GO:0030306	protein binding // ADP-ribosylation factor binding	---	---
10569024	-0.602597	0.0017399	Sigirr	NM_023059	RefSeq	Mus musculus single immunoglobulin and toll-interleukin 1 receptor (TIR) domain (Sigirr), mRNA.	FALSE	GO:0001960 // GO:0006953 // GO:0007165 // GO:0043433 // GO:0045079 // GO:0045087	negative regulation of cytokine-mediated signaling pathway // acute-phase response // signal transduction // negative regulation of sequence-specific DNA binding transcription factor activity // negative regulation of chemokine biosynthetic process // innate immune response	GO:0005622 // GO:0016020 // GO:0016021 // GO:0031224	intracellular // membrane // integral to membrane // intrinsic to membrane	GO:0004872 // GO:0004888	receptor activity // transmembrane signaling receptor activity	---	---
10569513	-0.898358	0.00104393	Osbpl5	NM_024289	RefSeq	Mus musculus oxysterol binding protein-like 5 (Osbpl5), transcript variant 1, mRNA.	FALSE	GO:0006810 // GO:0006869	transport // lipid transport	GO:0005783 // GO:0016020 // GO:0016021	endoplasmic reticulum // membrane // integral to membrane	GO:0005543 // GO:0008289	phospholipid binding // lipid binding	---	---
10571362	-0.994037	0.00173297	AI429214	NM_001039220	RefSeq	Mus musculus expressed sequence AI429214 (AI429214), mRNA.	FALSE	GO:0008150	biological_process	GO:0005575	cellular_component	GO:0003674	molecular_function	---	---
10571907	-0.80151	0.00249975	Mfap3l	NM_027756	RefSeq	Mus musculus microfibrillar-associated protein 3-like (Mfap3l), transcript variant 1, mRNA.	FALSE	GO:0008150	biological_process	GO:0005575 // GO:0005886 // GO:0016020 // GO:0016021	cellular_component // plasma membrane // membrane // integral to membrane	GO:0003674	molecular_function	---	---
10572253	-0.762927	0.00209594	Sugp1	NM_027481	RefSeq	Mus musculus SURP and G patch domain containing 1 (Sugp1), mRNA.	FALSE	GO:0006396 // GO:0006397 // GO:0008380	RNA processing // mRNA processing // RNA splicing	GO:0005634 // GO:0005681	nucleus // spliceosomal complex	GO:0003674 // GO:0003676 // GO:0003723	molecular_function // nucleic acid binding // RNA binding	---	---
10579335	-0.587732	0.00010905	Pgpep1	NM_023217	RefSeq	Mus musculus pyroglutamyl-peptidase I (Pgpep1), mRNA.	FALSE	GO:0006508	proteolysis	GO:0005737 // GO:0005829	cytoplasm // cytosol	GO:0008233 // GO:0008234 // GO:0016787	peptidase activity // cysteine-type peptidase activity // hydrolase activity	---	---
10579341	-0.596599	0.00323077	Mpv17l2	NM_183170	RefSeq	Mus musculus MPV17 mitochondrial membrane protein-like 2 (Mpv17l2), nuclear gene encoding mitochondrial protein, mRNA.	FALSE	GO:0008150	biological_process	GO:0005739 // GO:0016020 // GO:0016021	mitochondrion // membrane // integral to membrane	GO:0003674	molecular_function	---	---
10580635	-1.03707	0.00144653	Ces1d	NM_053200	RefSeq	Mus musculus carboxylesterase 1D (Ces1d), mRNA.	FALSE	GO:0006629 // GO:0006637 // GO:0009636 // GO:0016042 // GO:0046464	lipid metabolic process // acyl-CoA metabolic process // response to toxin // lipid catabolic process // acylglycerol catabolic process	GO:0005737 // GO:0005783 // GO:0005788 // GO:0005811 // GO:0005829	cytoplasm // endoplasmic reticulum // endoplasmic reticulum lumen // lipid particle // cytosol	GO:0004091 // GO:0004091 // GO:0004771 // GO:0004806 // GO:0016787 // GO:0030339 // GO:0050253 // GO:0080030 // GO:0080031 // GO:0080032	carboxylesterase activity // carboxylesterase activity // sterol esterase activity // triglyceride lipase activity // hydrolase activity // fatty-acyl-ethyl-ester synthase activity // retinyl-palmitate esterase activity // methyl indole-3-acetate esterase activity // methyl salicylate esterase activity // methyl jasmonate esterase activity	---	---
10580756	-0.595239	0.00486919	Fam192a	NM_028221	RefSeq	Mus musculus family with sequence similarity 192, member A (Fam192a), mRNA.	FALSE	GO:0008150	biological_process	GO:0005634	nucleus	GO:0003674	molecular_function	---	---
10581181	-0.664095	0.00131145	Tradd	ENSMUST00000034359	ENSEMBL	cdna:known chromosome:NCBIM37:8:107782186:107788509:-1 gene:ENSMUSG00000031887 gene_biotype:protein_coding transcript_biotype:protein_coding	FALSE	GO:0006915 // GO:0006917 // GO:0007165 // GO:0042981 // GO:0043123 // GO:0051291 // GO:0051798 // GO:0097191	apoptotic process // induction of apoptosis // signal transduction // regulation of apoptotic process // positive regulation of I-kappaB kinase/NF-kappaB cascade // protein heterooligomerization // positive regulation of hair follicle development // extrinsic apoptotic signaling pathway	GO:0005737 // GO:0005737 // GO:0005856 // GO:0043234 // GO:0043235 // GO:0045121	cytoplasm // cytoplasm // cytoskeleton // protein complex // receptor complex // membrane raft	GO:0004871 // GO:0005164 // GO:0005515 // GO:0019900 // GO:0032403 // GO:0042802 // GO:0060090 // GO:0070513	signal transducer activity // tumor necrosis factor receptor binding // protein binding // kinase binding // protein complex binding // identical protein binding // binding, bridging // death domain binding	---	---
10581664	-0.610832	0.000525366	Il34	NM_029646	RefSeq	Mus musculus interleukin 34 (Il34), transcript variant 2, mRNA.	FALSE	GO:0001934 // GO:0001934 // GO:0006954 // GO:0008284 // GO:0008284 // GO:0045087	positive regulation of protein phosphorylation // positive regulation of protein phosphorylation // inflammatory response // positive regulation of cell proliferation // positive regulation of cell proliferation // innate immune response	GO:0005576 // GO:0005615 // GO:0005615	extracellular region // extracellular space // extracellular space	GO:0005125 // GO:0005157 // GO:0005157 // GO:0008083	cytokine activity // macrophage colony-stimulating factor receptor binding // macrophage colony-stimulating factor receptor binding // growth factor activity	---	---
10582809	-0.886952	0.00356034	Tk1	NM_009387	RefSeq	Mus musculus thymidine kinase 1 (Tk1), mRNA.	FALSE	GO:0006260 // GO:0016310 // GO:0046104 // GO:0051289	DNA replication // phosphorylation // thymidine metabolic process // protein homotetramerization	GO:0005625 // GO:0005737	soluble fraction // cytoplasm	GO:0000166 // GO:0004797 // GO:0005524 // GO:0008270 // GO:0016301 // GO:0016740 // GO:0046872	nucleotide binding // thymidine kinase activity // ATP binding // zinc ion binding // kinase activity // transferase activity // metal ion binding	---	---
10585186	-0.595032	0.00229689	1600029D21Rik	NM_029639	RefSeq	Mus musculus RIKEN cDNA 1600029D21 gene (1600029D21Rik), mRNA.	FALSE	---	---	GO:0009897 // GO:0016020 // GO:0016021	external side of plasma membrane // membrane // integral to membrane	---	---	---	---
10588683	-0.625889	0.000311334	Hyal2	NM_010489	RefSeq	Mus musculus hyaluronoglucosaminidase 2 (Hyal2), mRNA.	FALSE	GO:0000302 // GO:0005975 // GO:0006027 // GO:0008152 // GO:0009615 // GO:0009615 // GO:0010764 // GO:0019066 // GO:0019087 // GO:0030214 // GO:0030214 // GO:0030308 // GO:0042117 // GO:0042117 // GO:0042307 // GO:0043065 // GO:0043407 // GO:0044344 // GO:0045944 // GO:0046718 // GO:0050729 // GO:0050729 // GO:0051607 // GO:0051898 // GO:0061099 // GO:0071347 // GO:0071493 // GO:0071560 // GO:0071…	response to reactive oxygen species // carbohydrate metabolic process // glycosaminoglycan catabolic process // metabolic process // response to virus // response to virus // negative regulation of fibroblast migration // translocation of virus into host cell // transformation of host cell by virus // hyaluronan catabolic process // hyaluronan catabolic process // negative regulation of cell grow…	GO:0000139 // GO:0000139 // GO:0005764 // GO:0005829 // GO:0005886 // GO:0005902 // GO:0009986 // GO:0009986 // GO:0016020 // GO:0016023 // GO:0016324 // GO:0030139 // GO:0031225 // GO:0031362 // GO:0031362 // GO:0031410 // GO:0044444 // GO:0045121 // GO:0045121 // GO:0046658 // GO:0046658 // GO:0048471	Golgi membrane // Golgi membrane // lysosome // cytosol // plasma membrane // microvillus // cell surface // cell surface // membrane // cytoplasmic membrane-bounded vesicle // apical plasma membrane // endocytic vesicle // anchored to membrane // anchored to external side of plasma membrane // anchored to external side of plasma membrane // cytoplasmic vesicle // cytoplasmic part // membrane raf…	GO:0001105 // GO:0001618 // GO:0001618 // GO:0003824 // GO:0004415 // GO:0004415 // GO:0004872 // GO:0005540 // GO:0005540 // GO:0016787 // GO:0016798 // GO:0019899 // GO:0019899 // GO:0030294 // GO:0030971 // GO:0033906 // GO:0050431	RNA polymerase II transcription coactivator activity // viral receptor activity // viral receptor activity // catalytic activity // hyalurononglucosaminidase activity // hyalurononglucosaminidase activity // receptor activity // hyaluronic acid binding // hyaluronic acid binding // hydrolase activity // hydrolase activity, acting on glycosyl bonds // enzyme binding // enzyme binding // receptor s…	---	---
10594519	-1.52093	0.000252914	Ostb	NM_178933	RefSeq	Mus musculus organic solute transporter beta (Ostb), mRNA.	FALSE	GO:0006810	transport	GO:0005886 // GO:0016020 // GO:0016021	plasma membrane // membrane // integral to membrane	GO:0005215	transporter activity	---	---
10599192	-0.982546	0.000370981	Lonrf3	NM_028894	RefSeq	Mus musculus LON peptidase N-terminal domain and ring finger 3 (Lonrf3), mRNA.	FALSE	GO:0006508 // GO:0008150	proteolysis // biological_process	GO:0005575	cellular_component	GO:0003674 // GO:0004176 // GO:0008270 // GO:0046872	molecular_function // ATP-dependent peptidase activity // zinc ion binding // metal ion binding	---	---
10604922	-0.60587	0.00220528	BC023829	ENSMUST00000101506	ENSEMBL	cdna:novel chromosome:NCBIM37:X:67712928:67730355:-1 gene:ENSMUSG00000073139 gene_biotype:protein_coding transcript_biotype:protein_coding	FALSE	GO:0008150	biological_process	GO:0005575	cellular_component	GO:0003674	molecular_function	---	---
10604954	-1.59924	0.0023924	Mir224	NR_029808	RefSeq	Mus musculus microRNA 224 (Mir224), microRNA.	FALSE	GO:0016055 // GO:0071222 // GO:0071230	Wnt receptor signaling pathway // cellular response to lipopolysaccharide // cellular response to amino acid stimulus	---	---	---	---	---	---
10607950	-0.825647	0.000827122	---	---	---	---	---	---	---	---	---	---	---	---	---

## Sheet: down.RA_SAvsWT
Table S2: Lists of genes differentially expressed between wildtype (WT), Rassf1a-/- Sav1+/+ (RA), Rassf1a+/+ Sav1+/- (SA) and Rassf1a-/- Sav1+/- (RA_SA) mouse livers
ID	RA_SA.vs.WT.FC	RA_SA.vs.WT.p	Gene.Symbol	mRNA.Accession	mRNA..Source	mRna...Description	mRNA...xhyb	GO.Biological.Process.ID	GO.Biological.Process.Term	GO.Cellular.Component.ID	GO.Cellular.Component.Term	GO.Molecular.Function.ID	GO.Molecular.Function.Term	Pathway.Source	Pathway.Name
10338064	-0.876825	0.00485426	---	---	---	---	---	---	---	---	---	---	---	---	---
10338186	-2.90115	0.00286463	---	---	---	---	---	---	---	---	---	---	---	---	---
10338345	-2.73817	0.00043842	---	---	---	---	---	---	---	---	---	---	---	---	---
10339281	-2.47719	0.00119791	---	---	---	---	---	---	---	---	---	---	---	---	---
10339323	-0.857911	0.00209526	---	---	---	---	---	---	---	---	---	---	---	---	---
10339581	-2.14169	0.00275057	---	---	---	---	---	---	---	---	---	---	---	---	---
10340158	-1.22286	0.00348633	---	---	---	---	---	---	---	---	---	---	---	---	---
10340732	-0.738856	0.00322187	---	---	---	---	---	---	---	---	---	---	---	---	---
10341278	-3.11518	0.00115934	---	---	---	---	---	---	---	---	---	---	---	---	---
10341322	-3.14688	0.00220711	---	---	---	---	---	---	---	---	---	---	---	---	---
10341364	-0.726453	0.00139326	---	---	---	---	---	---	---	---	---	---	---	---	---
10341716	-1.42353	0.00150855	---	---	---	---	---	---	---	---	---	---	---	---	---
10341727	-0.602761	0.000352091	---	---	---	---	---	---	---	---	---	---	---	---	---
10341800	-1.27796	0.00121125	---	---	---	---	---	---	---	---	---	---	---	---	---
10342270	-0.718851	0.00303199	---	---	---	---	---	---	---	---	---	---	---	---	---
10342296	-1.37888	0.00120935	---	---	---	---	---	---	---	---	---	---	---	---	---
10342323	-0.798857	0.00318804	---	---	---	---	---	---	---	---	---	---	---	---	---
10342805	-1.35258	0.000119944	---	---	---	---	---	---	---	---	---	---	---	---	---
10343469	-0.688188	0.003778	---	---	---	---	---	---	---	---	---	---	---	---	---
10343513	-0.851477	0.00453021	---	---	---	---	---	---	---	---	---	---	---	---	---
10343844	-0.984377	0.00166023	---	---	---	---	---	---	---	---	---	---	---	---	---
10344342	-1.17808	0.00268167	---	---	---	---	---	---	---	---	---	---	---	---	---
10344551	-1.07619	0.00141212	---	---	---	---	---	---	---	---	---	---	---	---	---
10345509	-0.913523	0.000642413	Zap70	NM_009539	RefSeq	Mus musculus zeta-chain (TCR) associated protein kinase (Zap70), mRNA.	FALSE	GO:0006468 // GO:0006468 // GO:0006468 // GO:0006955 // GO:0016310 // GO:0018108 // GO:0018108 // GO:0035556 // GO:0043366 // GO:0045059 // GO:0045059 // GO:0045060 // GO:0045061 // GO:0045582 // GO:0045582 // GO:0046638 // GO:0046638 // GO:0046641 // GO:0046777 // GO:0046777 // GO:0050850 // GO:0050852	protein phosphorylation // protein phosphorylation // protein phosphorylation // immune response // phosphorylation // peptidyl-tyrosine phosphorylation // peptidyl-tyrosine phosphorylation // intracellular signal transduction // beta selection // positive thymic T cell selection // positive thymic T cell selection // negative thymic T cell selection // thymic T cell selection // positive regulat…	GO:0001772 // GO:0005737 // GO:0005829 // GO:0005886 // GO:0016020 // GO:0042101	immunological synapse // cytoplasm // cytosol // plasma membrane // membrane // T cell receptor complex	GO:0000166 // GO:0001784 // GO:0004672 // GO:0004713 // GO:0004713 // GO:0004713 // GO:0004715 // GO:0005515 // GO:0005524 // GO:0016301 // GO:0016740 // GO:0016772	nucleotide binding // phosphotyrosine binding // protein kinase activity // protein tyrosine kinase activity // protein tyrosine kinase activity // protein tyrosine kinase activity // non-membrane spanning protein tyrosine kinase activity // protein binding // ATP binding // kinase activity // transferase activity // transferase activity, transferring phosphorus-containing groups	GenMAPP	Inflammatory_Response_Pathway
10346298	-1.89306	1.73909e-05	Coq10b	NM_001039710	RefSeq	Mus musculus coenzyme Q10 homolog B (S. cerevisiae) (Coq10b), nuclear gene encoding mitochondrial protein, transcript variant 1, mRNA.	FALSE	GO:0008150	biological_process	GO:0005739 // GO:0005743 // GO:0016020	mitochondrion // mitochondrial inner membrane // membrane	GO:0003674	molecular_function	---	---
10348234	-0.706368	0.00459937	Neu2	ENSMUST00000165109	ENSEMBL	cdna:known chromosome:NCBIM37:1:89491125:89494396:1 gene:ENSMUSG00000079434 gene_biotype:protein_coding transcript_biotype:protein_coding	FALSE	GO:0008152 // GO:0010831 // GO:0045663	metabolic process // positive regulation of myotube differentiation // positive regulation of myoblast differentiation	GO:0005737 // GO:0005829	cytoplasm // cytosol	GO:0004308 // GO:0016787 // GO:0016798 // GO:0052794 // GO:0052795 // GO:0052796	exo-alpha-sialidase activity // hydrolase activity // hydrolase activity, acting on glycosyl bonds // exo-alpha-(2->3)-sialidase activity // exo-alpha-(2->6)-sialidase activity // exo-alpha-(2->8)-sialidase activity	---	---
10348666	-0.760795	0.000393154	Dusp28	NM_175118	RefSeq	Mus musculus dual specificity phosphatase 28 (Dusp28), mRNA.	FALSE	GO:0006470 // GO:0016311 // GO:0035335	protein dephosphorylation // dephosphorylation // peptidyl-tyrosine dephosphorylation	GO:0005575	cellular_component	GO:0004721 // GO:0004725 // GO:0008138 // GO:0016787 // GO:0016791	phosphoprotein phosphatase activity // protein tyrosine phosphatase activity // protein tyrosine/serine/threonine phosphatase activity // hydrolase activity // phosphatase activity	---	---
10348682	-0.641369	0.00430715	Capn10	NM_011796	RefSeq	Mus musculus calpain 10 (Capn10), mRNA.	FALSE	GO:0006508 // GO:0007568 // GO:0031532 // GO:0031532 // GO:0031667 // GO:0032024 // GO:0032388 // GO:0032869 // GO:0032869 // GO:0043065 // GO:0043065 // GO:0046326 // GO:0046326	proteolysis // aging // actin cytoskeleton reorganization // actin cytoskeleton reorganization // response to nutrient levels // positive regulation of insulin secretion // positive regulation of intracellular transport // cellular response to insulin stimulus // cellular response to insulin stimulus // positive regulation of apoptotic process // positive regulation of apoptotic process // positi…	GO:0005622 // GO:0005623 // GO:0005634 // GO:0005737 // GO:0005741 // GO:0005743 // GO:0005758 // GO:0005759 // GO:0005792 // GO:0005829 // GO:0005856 // GO:0005886 // GO:0005938	intracellular // cell // nucleus // cytoplasm // mitochondrial outer membrane // mitochondrial inner membrane // mitochondrial intermembrane space // mitochondrial matrix // microsome // cytosol // cytoskeleton // plasma membrane // cell cortex	GO:0000149 // GO:0004198 // GO:0008092 // GO:0008233 // GO:0008234 // GO:0016787	SNARE binding // calcium-dependent cysteine-type endopeptidase activity // cytoskeletal protein binding // peptidase activity // cysteine-type peptidase activity // hydrolase activity	GenMAPP	Integrin-mediated_cell_adhesion_KEGG
10348917	-0.8882	0.000502096	Fam174a	NM_026321	RefSeq	Mus musculus family with sequence similarity 174, member A (Fam174a), mRNA.	FALSE	GO:0008150	biological_process	GO:0005575 // GO:0016020 // GO:0016021	cellular_component // membrane // integral to membrane	GO:0003674	molecular_function	---	---
10349922	-1.83452	0.00153668	Ren1	NM_031192	RefSeq	Mus musculus renin 1 structural (Ren1), mRNA.	FALSE	GO:0001822 // GO:0002003 // GO:0002003 // GO:0002016 // GO:0002018 // GO:0006508 // GO:0006950 // GO:0008065 // GO:0008152 // GO:0008217 // GO:0009755 // GO:0010033 // GO:0042493 // GO:0042756 // GO:0043408 // GO:0048469 // GO:0051591 // GO:0070305	kidney development // angiotensin maturation // angiotensin maturation // regulation of blood volume by renin-angiotensin // renin-angiotensin regulation of aldosterone production // proteolysis // response to stress // establishment of blood-nerve barrier // metabolic process // regulation of blood pressure // hormone-mediated signaling pathway // response to organic substance // response to dru…	GO:0005576 // GO:0005615 // GO:0005615 // GO:0005622 // GO:0005625 // GO:0016020 // GO:0044444	extracellular region // extracellular space // extracellular space // intracellular // soluble fraction // membrane // cytoplasmic part	GO:0004175 // GO:0004175 // GO:0004190 // GO:0005102 // GO:0005159 // GO:0008233 // GO:0016787	endopeptidase activity // endopeptidase activity // aspartic-type endopeptidase activity // receptor binding // insulin-like growth factor receptor binding // peptidase activity // hydrolase activity	---	---
10349932	-0.711737	4.78407e-05	Etnk2	NM_175443	RefSeq	Mus musculus ethanolamine kinase 2 (Etnk2), mRNA.	FALSE	GO:0001701 // GO:0001890 // GO:0006646 // GO:0008654 // GO:0009791 // GO:0016310 // GO:0035264	in utero embryonic development // placenta development // phosphatidylethanolamine biosynthetic process // phospholipid biosynthetic process // post-embryonic development // phosphorylation // multicellular organism growth	GO:0005575	cellular_component	GO:0000166 // GO:0004103 // GO:0004305 // GO:0005524 // GO:0016301 // GO:0016740 // GO:0016772 // GO:0016773	nucleotide binding // choline kinase activity // ethanolamine kinase activity // ATP binding // kinase activity // transferase activity // transferase activity, transferring phosphorus-containing groups // phosphotransferase activity, alcohol group as acceptor	---	---
10351533	-0.834594	9.87369e-05	Nr1i3	NM_009803	RefSeq	Mus musculus nuclear receptor subfamily 1, group I, member 3 (Nr1i3), transcript variant 1, mRNA.	FALSE	GO:0006351 // GO:0006355 // GO:0043401 // GO:0045892	transcription, DNA-dependent // regulation of transcription, DNA-dependent // steroid hormone mediated signaling pathway // negative regulation of transcription, DNA-dependent	GO:0005634 // GO:0005737 // GO:0005829 // GO:0005856	nucleus // cytoplasm // cytosol // cytoskeleton	GO:0003677 // GO:0003700 // GO:0003707 // GO:0004872 // GO:0004887 // GO:0005515 // GO:0008270 // GO:0043565 // GO:0046872	DNA binding // sequence-specific DNA binding transcription factor activity // steroid hormone receptor activity // receptor activity // thyroid hormone receptor activity // protein binding // zinc ion binding // sequence-specific DNA binding // metal ion binding	GenMAPP	Nuclear_Receptors
10352110	-1.26394	0.00183887	Gm16432	NM_001034899	RefSeq	Mus musculus predicted gene 16432 (Gm16432), mRNA.	FALSE	GO:0008150	biological_process	GO:0005575	cellular_component	GO:0003674	molecular_function	---	---
10353672	-1.15559	0.00209518	---	ENSMUST00000083191	ENSEMBL	ncrna:rRNA chromosome:NCBIM37:1:27015948:27016066:-1 gene:ENSMUSG00000065125 gene_biotype:rRNA transcript_biotype:rRNA	FALSE	---	---	---	---	---	---	---	---
10356406	-0.687515	0.00231597	Ngef	NM_001111314	RefSeq	Mus musculus neuronal guanine nucleotide exchange factor (Ngef), transcript variant 1, mRNA.	FALSE	GO:0007275 // GO:0007399 // GO:0009987 // GO:0030154 // GO:0035023 // GO:0043087 // GO:0048013 // GO:0061002	multicellular organismal development // nervous system development // cellular process // cell differentiation // regulation of Rho protein signal transduction // regulation of GTPase activity // ephrin receptor signaling pathway // negative regulation of dendritic spine morphogenesis	GO:0005622 // GO:0005737 // GO:0005886 // GO:0016020 // GO:0042995	intracellular // cytoplasm // plasma membrane // membrane // cell projection	GO:0005085 // GO:0005089 // GO:0005515 // GO:0005543 // GO:0046875	guanyl-nucleotide exchange factor activity // Rho guanyl-nucleotide exchange factor activity // protein binding // phospholipid binding // ephrin receptor binding	---	---
10356601	-1.7125	3.2093e-05	Per2	NM_011066	RefSeq	Mus musculus period homolog 2 (Drosophila) (Per2), mRNA.	FALSE	GO:0000122 // GO:0000122 // GO:0006351 // GO:0006355 // GO:0007165 // GO:0007623 // GO:0048511	negative regulation of transcription from RNA polymerase II promoter // negative regulation of transcription from RNA polymerase II promoter // transcription, DNA-dependent // regulation of transcription, DNA-dependent // signal transduction // circadian rhythm // rhythmic process	GO:0005634 // GO:0005634 // GO:0005737	nucleus // nucleus // cytoplasm	GO:0000988 // GO:0004871 // GO:0005515	protein binding transcription factor activity // signal transducer activity // protein binding	GenMAPP	Circadian_Exercise
10356677	-0.841231	0.00166282	Myeov2	NM_001163425	RefSeq	Mus musculus myeloma overexpressed 2 (Myeov2), transcript variant 1, mRNA.	FALSE	GO:0008150	biological_process	GO:0005575	cellular_component	GO:0003674	molecular_function	---	---
10361246	-0.92182	0.00170453	G0s2	NM_008059	RefSeq	Mus musculus G0/G1 switch gene 2 (G0s2), mRNA.	FALSE	GO:0006915 // GO:0043065	apoptotic process // positive regulation of apoptotic process	GO:0005739	mitochondrion	---	---	GenMAPP	Circadian_Exercise
10361760	-0.802511	4.93224e-05	Timm8a1	ENSMUST00000054213	ENSEMBL	cdna:known chromosome:NCBIM37:X:131071795:131076404:-1 gene:ENSMUSG00000048007 gene_biotype:protein_coding transcript_biotype:protein_coding	FALSE	GO:0006626	protein targeting to mitochondrion	GO:0005625 // GO:0005739 // GO:0005739 // GO:0005758	soluble fraction // mitochondrion // mitochondrion // mitochondrial intermembrane space	GO:0008270	zinc ion binding	---	---
10362394	-0.619036	0.000341108	Hddc2	ENSMUST00000000304	ENSEMBL	cdna:known chromosome:NCBIM37:10:31033188:31048010:1 gene:ENSMUSG00000000295 gene_biotype:protein_coding transcript_biotype:protein_coding	FALSE	GO:0008150	biological_process	GO:0005739	mitochondrion	GO:0003674 // GO:0003824 // GO:0008081 // GO:0046872	molecular_function // catalytic activity // phosphoric diester hydrolase activity // metal ion binding	---	---
10362916	-0.619967	0.000775948	Aim1	NM_172393	RefSeq	Mus musculus absent in melanoma 1 (Aim1), mRNA.	FALSE	GO:0008150	biological_process	GO:0005575	cellular_component	GO:0003674	molecular_function	---	---
10363528	-0.799964	0.00109335	Aifm2	NM_001039194	RefSeq	Mus musculus apoptosis-inducing factor, mitochondrion-associated 2 (Aifm2), nuclear gene encoding mitochondrial protein, transcript variant 3, mRNA.	FALSE	GO:0006917 // GO:0030261 // GO:0055114	induction of apoptosis // chromosome condensation // oxidation-reduction process	GO:0005737 // GO:0005739 // GO:0005739 // GO:0005741 // GO:0005811 // GO:0005829 // GO:0016020 // GO:0016021	cytoplasm // mitochondrion // mitochondrion // mitochondrial outer membrane // lipid particle // cytosol // membrane // integral to membrane	GO:0003677 // GO:0004174 // GO:0016491 // GO:0050660	DNA binding // electron-transferring-flavoprotein dehydrogenase activity // oxidoreductase activity // flavin adenine dinucleotide binding	---	---
10364373	-0.777979	0.00237573	Lsm7	NM_025349	RefSeq	Mus musculus LSM7 homolog, U6 small nuclear RNA associated (S. cerevisiae) (Lsm7), mRNA.	FALSE	GO:0006402	mRNA catabolic process	GO:0005737	cytoplasm	GO:0005515 // GO:0046982	protein binding // protein heterodimerization activity	---	---
10367641	-0.881025	0.00103952	Mthfd1l	NM_172308	RefSeq	Mus musculus methylenetetrahydrofolate dehydrogenase (NADP+ dependent) 1-like (Mthfd1l), nuclear gene encoding mitochondrial protein, transcript variant 2, mRNA.	FALSE	GO:0006730 // GO:0006760 // GO:0009257 // GO:0009396 // GO:0015942 // GO:0046653 // GO:0055114	one-carbon metabolic process // folic acid-containing compound metabolic process // 10-formyltetrahydrofolate biosynthetic process // folic acid-containing compound biosynthetic process // formate metabolic process // tetrahydrofolate metabolic process // oxidation-reduction process	GO:0005737 // GO:0005739 // GO:0005739	cytoplasm // mitochondrion // mitochondrion	GO:0000166 // GO:0003824 // GO:0004329 // GO:0004488 // GO:0005524 // GO:0016874 // GO:0042803	nucleotide binding // catalytic activity // formate-tetrahydrofolate ligase activity // methylenetetrahydrofolate dehydrogenase (NADP+) activity // ATP binding // ligase activity // protein homodimerization activity	---	---
10369828	-0.914791	0.00227067	---	---	---	---	---	---	---	---	---	---	---	---	---
10370013	-0.769517	0.00017274	Gstt2	NM_010361	RefSeq	Mus musculus glutathione S-transferase, theta 2 (Gstt2), mRNA.	FALSE	GO:0006749	glutathione metabolic process	GO:0005634 // GO:0005737 // GO:0005829	nucleus // cytoplasm // cytosol	GO:0004364 // GO:0016740	glutathione transferase activity // transferase activity	---	---
10370931	-0.968819	0.000219781	Mknk2	ENSMUST00000072616	ENSEMBL	cdna:known chromosome:NCBIM37:10:80128532:80139038:-1 gene:ENSMUSG00000020190 gene_biotype:protein_coding transcript_biotype:protein_coding	FALSE	GO:0006417 // GO:0006468 // GO:0006468 // GO:0006468 // GO:0006915 // GO:0007243 // GO:0007243 // GO:0016310 // GO:0030097 // GO:0071243	regulation of translation // protein phosphorylation // protein phosphorylation // protein phosphorylation // apoptotic process // intracellular protein kinase cascade // intracellular protein kinase cascade // phosphorylation // hemopoiesis // cellular response to arsenic-containing substance	GO:0005634 // GO:0005737	nucleus // cytoplasm	GO:0000166 // GO:0004672 // GO:0004674 // GO:0004674 // GO:0005515 // GO:0005524 // GO:0005524 // GO:0016301 // GO:0016740 // GO:0016772 // GO:0046872	nucleotide binding // protein kinase activity // protein serine/threonine kinase activity // protein serine/threonine kinase activity // protein binding // ATP binding // ATP binding // kinase activity // transferase activity // transferase activity, transferring phosphorus-containing groups // metal ion binding	---	---
10371006	-0.631303	0.00132896	Timm13	NM_013895	RefSeq	Mus musculus translocase of inner mitochondrial membrane 13 homolog (yeast) (Timm13), nuclear gene encoding mitochondrial protein, mRNA.	FALSE	GO:0006626 // GO:0006810 // GO:0015031 // GO:0045039	protein targeting to mitochondrion // transport // protein transport // protein import into mitochondrial inner membrane	GO:0005739 // GO:0005743 // GO:0016020 // GO:0042719	mitochondrion // mitochondrial inner membrane // membrane // mitochondrial intermembrane space protein transporter complex	GO:0046872	metal ion binding	---	---
10373000	-0.944135	0.000436468	Xrcc6bp1	NM_026858	RefSeq	Mus musculus XRCC6 binding protein 1 (Xrcc6bp1), transcript variant 2, mRNA.	FALSE	GO:0006508 // GO:0008150	proteolysis // biological_process	GO:0005575	cellular_component	GO:0003674 // GO:0004222 // GO:0008233 // GO:0008237 // GO:0016787 // GO:0046872	molecular_function // metalloendopeptidase activity // peptidase activity // metallopeptidase activity // hydrolase activity // metal ion binding	---	---
10373452	-4.0178	1.82349e-06	---	GENSCAN00000035267	ENSEMBL	cdna:genscan chromosome:NCBIM37:10:127981235:127987794:-1 transcript_biotype:protein_coding	FALSE	---	---	---	---	---	---	---	---
10377439	-1.70083	0.000549761	Per1	NM_001159367	RefSeq	Mus musculus period homolog 1 (Drosophila) (Per1), transcript variant 2, mRNA.	FALSE	GO:0000122 // GO:0006351 // GO:0006355 // GO:0007165 // GO:0007623 // GO:0007623 // GO:0032922 // GO:0045892 // GO:0048511	negative regulation of transcription from RNA polymerase II promoter // transcription, DNA-dependent // regulation of transcription, DNA-dependent // signal transduction // circadian rhythm // circadian rhythm // circadian regulation of gene expression // negative regulation of transcription, DNA-dependent // rhythmic process	GO:0005634 // GO:0005737	nucleus // cytoplasm	GO:0000978 // GO:0000988 // GO:0004871 // GO:0005515 // GO:0070888	RNA polymerase II core promoter proximal region sequence-specific DNA binding // protein binding transcription factor activity // signal transducer activity // protein binding // E-box binding	---	---
10377605	-0.927721	0.0037052	1810027O10Rik	BC117077	GenBank	Mus musculus RIKEN cDNA 1810027O10 gene, mRNA (cDNA clone MGC:151454 IMAGE:40126396), complete cds.	FALSE	GO:0008150	biological_process	GO:0005743 // GO:0016020 // GO:0016021	mitochondrial inner membrane // membrane // integral to membrane	GO:0003674	molecular_function	---	---
10378013	-0.607592	0.000306647	Rpain	NM_027186	RefSeq	Mus musculus RPA interacting protein (Rpain), transcript variant 1, mRNA.	FALSE	GO:0006261 // GO:0006281 // GO:0006310 // GO:0006606 // GO:0009411	DNA-dependent DNA replication // DNA repair // DNA recombination // protein import into nucleus // response to UV	GO:0005634 // GO:0005730 // GO:0005737 // GO:0016605	nucleus // nucleolus // cytoplasm // PML body	GO:0032403 // GO:0046872	protein complex binding // metal ion binding	---	---
10380821	-0.700588	0.00231411	Atp5l	NM_013795	RefSeq	Mus musculus ATP synthase, H+ transporting, mitochondrial F0 complex, subunit g (Atp5l), nuclear gene encoding mitochondrial protein, mRNA.	FALSE	GO:0006200 // GO:0006754 // GO:0006810 // GO:0006811 // GO:0015986 // GO:0015992 // GO:0034220	ATP catabolic process // ATP biosynthetic process // transport // ion transport // ATP synthesis coupled proton transport // proton transport // ion transmembrane transport	GO:0000276 // GO:0005739 // GO:0005739 // GO:0005743 // GO:0005753 // GO:0016020 // GO:0045263	mitochondrial proton-transporting ATP synthase complex, coupling factor F(o) // mitochondrion // mitochondrion // mitochondrial inner membrane // mitochondrial proton-transporting ATP synthase complex // membrane // proton-transporting ATP synthase complex, coupling factor F(o)	GO:0008553 // GO:0015078	hydrogen-exporting ATPase activity, phosphorylative mechanism // hydrogen ion transmembrane transporter activity	GenMAPP	Electron_Transport_Chain
10382136	-0.621698	0.00334298	1810010H24Rik	NM_001163473	RefSeq	Mus musculus RIKEN cDNA 1810010H24 gene (1810010H24Rik), mRNA.	FALSE	GO:0008150	biological_process	GO:0005575	cellular_component	GO:0003674	molecular_function	---	---
10382300	-1.16859	0.000141671	Map2k6	NM_011943	RefSeq	Mus musculus mitogen-activated protein kinase kinase 6 (Map2k6), mRNA.	FALSE	GO:0000165 // GO:0000187 // GO:0000187 // GO:0006351 // GO:0006355 // GO:0006468 // GO:0006468 // GO:0006915 // GO:0006950 // GO:0016310 // GO:0043065 // GO:0060048	MAPK cascade // activation of MAPK activity // activation of MAPK activity // transcription, DNA-dependent // regulation of transcription, DNA-dependent // protein phosphorylation // protein phosphorylation // apoptotic process // response to stress // phosphorylation // positive regulation of apoptotic process // cardiac muscle contraction	GO:0005634 // GO:0005737 // GO:0005856	nucleus // cytoplasm // cytoskeleton	GO:0000166 // GO:0004672 // GO:0004674 // GO:0004713 // GO:0005515 // GO:0005524 // GO:0016301 // GO:0016740 // GO:0016772 // GO:0019901	nucleotide binding // protein kinase activity // protein serine/threonine kinase activity // protein tyrosine kinase activity // protein binding // ATP binding // kinase activity // transferase activity // transferase activity, transferring phosphorus-containing groups // protein kinase binding	GenMAPP // GenMAPP	Integrin-mediated_cell_adhesion_KEGG // MAPK_Cascade
10382888	-1.63166	0.00228825	2810008D09Rik	AK171830	GenBank HTC	Mus musculus activated spleen cDNA, RIKEN full-length enriched library, clone:F830013G13 product:hypothetical protein, full insert sequence.	FALSE	---	---	---	---	---	---	---	---
10383152	-1.10533	0.00190457	Rnf213	ENSMUST00000131035	ENSEMBL	cdna:known chromosome:NCBIM37:11:119254414:119348732:1 gene:ENSMUSG00000070327 gene_biotype:protein_coding transcript_biotype:protein_coding	FALSE	GO:0006200 // GO:0016567 // GO:0051865	ATP catabolic process // protein ubiquitination // protein autoubiquitination	GO:0005737	cytoplasm	GO:0000166 // GO:0004842 // GO:0008270 // GO:0016874 // GO:0016887 // GO:0017111 // GO:0046872	nucleotide binding // ubiquitin-protein ligase activity // zinc ion binding // ligase activity // ATPase activity // nucleoside-triphosphatase activity // metal ion binding	---	---
10383168	-1.06232	0.000617471	---	---	---	---	---	---	---	---	---	---	---	---	---
10383192	-1.63952	0.000272231	---	---	---	---	---	---	---	---	---	---	---	---	---
10383194	-1.01753	0.000124907	Rnf213	ENSMUST00000131035	ENSEMBL	cdna:known chromosome:NCBIM37:11:119254414:119348732:1 gene:ENSMUSG00000070327 gene_biotype:protein_coding transcript_biotype:protein_coding	FALSE	GO:0006200 // GO:0016567 // GO:0051865	ATP catabolic process // protein ubiquitination // protein autoubiquitination	GO:0005737	cytoplasm	GO:0000166 // GO:0004842 // GO:0008270 // GO:0016874 // GO:0016887 // GO:0017111 // GO:0046872	nucleotide binding // ubiquitin-protein ligase activity // zinc ion binding // ligase activity // ATPase activity // nucleoside-triphosphatase activity // metal ion binding	---	---
10383198	-1.29673	0.000499174	---	---	---	---	---	---	---	---	---	---	---	---	---
10383200	-1.3131	0.0027163	---	---	---	---	---	---	---	---	---	---	---	---	---
10383202	-1.23925	0.00349823	Rnf213	ENSMUST00000131035	ENSEMBL	cdna:known chromosome:NCBIM37:11:119254414:119348732:1 gene:ENSMUSG00000070327 gene_biotype:protein_coding transcript_biotype:protein_coding	FALSE	GO:0006200 // GO:0016567 // GO:0051865	ATP catabolic process // protein ubiquitination // protein autoubiquitination	GO:0005737	cytoplasm	GO:0000166 // GO:0004842 // GO:0008270 // GO:0016874 // GO:0016887 // GO:0017111 // GO:0046872	nucleotide binding // ubiquitin-protein ligase activity // zinc ion binding // ligase activity // ATPase activity // nucleoside-triphosphatase activity // metal ion binding	---	---
10383204	-1.30531	0.000629633	Rnf213	ENSMUST00000131035	ENSEMBL	cdna:known chromosome:NCBIM37:11:119254414:119348732:1 gene:ENSMUSG00000070327 gene_biotype:protein_coding transcript_biotype:protein_coding	FALSE	GO:0006200 // GO:0016567 // GO:0051865	ATP catabolic process // protein ubiquitination // protein autoubiquitination	GO:0005737	cytoplasm	GO:0000166 // GO:0004842 // GO:0008270 // GO:0016874 // GO:0016887 // GO:0017111 // GO:0046872	nucleotide binding // ubiquitin-protein ligase activity // zinc ion binding // ligase activity // ATPase activity // nucleoside-triphosphatase activity // metal ion binding	---	---
10383206	-1.05302	0.00215563	---	---	---	---	---	---	---	---	---	---	---	---	---
10383208	-1.394	0.00104858	---	---	---	---	---	---	---	---	---	---	---	---	---
10383210	-1.37657	0.000105257	Rnf213	ENSMUST00000131035	ENSEMBL	cdna:known chromosome:NCBIM37:11:119254414:119348732:1 gene:ENSMUSG00000070327 gene_biotype:protein_coding transcript_biotype:protein_coding	FALSE	GO:0006200 // GO:0016567 // GO:0051865	ATP catabolic process // protein ubiquitination // protein autoubiquitination	GO:0005737	cytoplasm	GO:0000166 // GO:0004842 // GO:0008270 // GO:0016874 // GO:0016887 // GO:0017111 // GO:0046872	nucleotide binding // ubiquitin-protein ligase activity // zinc ion binding // ligase activity // ATPase activity // nucleoside-triphosphatase activity // metal ion binding	---	---
10383212	-1.34955	0.00014761	Rnf213	ENSMUST00000131035	ENSEMBL	cdna:known chromosome:NCBIM37:11:119254414:119348732:1 gene:ENSMUSG00000070327 gene_biotype:protein_coding transcript_biotype:protein_coding	FALSE	GO:0006200 // GO:0016567 // GO:0051865	ATP catabolic process // protein ubiquitination // protein autoubiquitination	GO:0005737	cytoplasm	GO:0000166 // GO:0004842 // GO:0008270 // GO:0016874 // GO:0016887 // GO:0017111 // GO:0046872	nucleotide binding // ubiquitin-protein ligase activity // zinc ion binding // ligase activity // ATPase activity // nucleoside-triphosphatase activity // metal ion binding	---	---
10383214	-1.192	0.000383814	Rnf213	AK173199	GenBank	Mus musculus premature mRNA for mKIAA1554 protein.	FALSE	GO:0006200 // GO:0016567 // GO:0051865	ATP catabolic process // protein ubiquitination // protein autoubiquitination	GO:0005737	cytoplasm	GO:0000166 // GO:0004842 // GO:0008270 // GO:0016874 // GO:0016887 // GO:0017111 // GO:0046872	nucleotide binding // ubiquitin-protein ligase activity // zinc ion binding // ligase activity // ATPase activity // nucleoside-triphosphatase activity // metal ion binding	---	---
10383233	-1.29733	0.000883891	Rnf213	AK173199	GenBank	Mus musculus premature mRNA for mKIAA1554 protein.	FALSE	GO:0006200 // GO:0016567 // GO:0051865	ATP catabolic process // protein ubiquitination // protein autoubiquitination	GO:0005737	cytoplasm	GO:0000166 // GO:0004842 // GO:0008270 // GO:0016874 // GO:0016887 // GO:0017111 // GO:0046872	nucleotide binding // ubiquitin-protein ligase activity // zinc ion binding // ligase activity // ATPase activity // nucleoside-triphosphatase activity // metal ion binding	---	---
10383389	-0.743969	0.00011307	Mrpl12	NM_027204	RefSeq	Mus musculus mitochondrial ribosomal protein L12 (Mrpl12), nuclear gene encoding mitochondrial protein, mRNA.	FALSE	GO:0006390 // GO:0006412 // GO:0045893	transcription from mitochondrial promoter // translation // positive regulation of transcription, DNA-dependent	GO:0005622 // GO:0005739 // GO:0005739 // GO:0005761 // GO:0005762 // GO:0005840 // GO:0030529	intracellular // mitochondrion // mitochondrion // mitochondrial ribosome // mitochondrial large ribosomal subunit // ribosome // ribonucleoprotein complex	GO:0003735	structural constituent of ribosome	---	---
10383632	-0.755467	0.00209701	Sfi1	NM_030207	RefSeq	Mus musculus Sfi1 homolog, spindle assembly associated (yeast) (Sfi1), mRNA.	FALSE	GO:0010923	negative regulation of phosphatase activity	GO:0005737 // GO:0005856	cytoplasm // cytoskeleton	GO:0019902	phosphatase binding	---	---
10385283	-1.1441	0.000257744	Gabrg2	ENSMUST00000070725	ENSEMBL	cdna:known chromosome:NCBIM37:11:41723705:41814359:-1 gene:ENSMUSG00000020436 gene_biotype:protein_coding transcript_biotype:protein_coding	FALSE	GO:0006810 // GO:0006811 // GO:0006821 // GO:0007214 // GO:0007268 // GO:0009791 // GO:0030534 // GO:0051932	transport // ion transport // chloride transport // gamma-aminobutyric acid signaling pathway // synaptic transmission // post-embryonic development // adult behavior // synaptic transmission, GABAergic	GO:0005737 // GO:0005886 // GO:0016020 // GO:0016021 // GO:0030054 // GO:0030424 // GO:0032590 // GO:0034707 // GO:0045202 // GO:0045211 // GO:0060077	cytoplasm // plasma membrane // membrane // integral to membrane // cell junction // axon // dendrite membrane // chloride channel complex // synapse // postsynaptic membrane // inhibitory synapse	GO:0004872 // GO:0004890 // GO:0004890 // GO:0005216 // GO:0005230 // GO:0005254 // GO:0005515	receptor activity // GABA-A receptor activity // GABA-A receptor activity // ion channel activity // extracellular ligand-gated ion channel activity // chloride channel activity // protein binding	---	---
10386123	-0.592345	0.00123023	---	---	---	---	---	---	---	---	---	---	---	---	---
10386844	-0.762889	0.000427925	Zswim7	NM_027198	RefSeq	Mus musculus zinc finger, SWIM-type containing 7 (Zswim7), mRNA.	FALSE	GO:0000724 // GO:0006281 // GO:0006310 // GO:0006974 // GO:0050821	double-strand break repair via homologous recombination // DNA repair // DNA recombination // response to DNA damage stimulus // protein stabilization	GO:0005634 // GO:0097196	nucleus // Shu complex	GO:0003674 // GO:0008270 // GO:0046872	molecular_function // zinc ion binding // metal ion binding	---	---
10388154	-0.642149	0.00413494	Med31	NM_026068	RefSeq	Mus musculus mediator of RNA polymerase II transcription, subunit 31 homolog (yeast) (Med31), mRNA.	FALSE	GO:0006351 // GO:0006355 // GO:0006461	transcription, DNA-dependent // regulation of transcription, DNA-dependent // protein complex assembly	GO:0005634 // GO:0016592	nucleus // mediator complex	GO:0001104 // GO:0005515 // GO:0032403	RNA polymerase II transcription cofactor activity // protein binding // protein complex binding	---	---
10393047	-0.685917	0.000331842	Galk1	NM_016905	RefSeq	Mus musculus galactokinase 1 (Galk1), mRNA.	FALSE	GO:0006012 // GO:0006012 // GO:0006012 // GO:0016310 // GO:0019402 // GO:0046835 // GO:0046835	galactose metabolic process // galactose metabolic process // galactose metabolic process // phosphorylation // galactitol metabolic process // carbohydrate phosphorylation // carbohydrate phosphorylation	GO:0005737	cytoplasm	GO:0000166 // GO:0004335 // GO:0004335 // GO:0005515 // GO:0005524 // GO:0005534 // GO:0016301 // GO:0016740	nucleotide binding // galactokinase activity // galactokinase activity // protein binding // ATP binding // galactose binding // kinase activity // transferase activity	---	---
10393431	-0.947509	0.00156493	Tk1	NM_009387	RefSeq	Mus musculus thymidine kinase 1 (Tk1), mRNA.	FALSE	GO:0006260 // GO:0016310 // GO:0046104 // GO:0051289	DNA replication // phosphorylation // thymidine metabolic process // protein homotetramerization	GO:0005625 // GO:0005737	soluble fraction // cytoplasm	GO:0000166 // GO:0004797 // GO:0005524 // GO:0008270 // GO:0016301 // GO:0016740 // GO:0046872	nucleotide binding // thymidine kinase activity // ATP binding // zinc ion binding // kinase activity // transferase activity // metal ion binding	---	---
10393801	-0.736965	0.000186495	1810049H13Rik	BC147292	GenBank	Mus musculus RIKEN cDNA 1810049H13 gene, mRNA (cDNA clone MGC:182447 IMAGE:9056341), complete cds.	FALSE	GO:0008150	biological_process	GO:0005739	mitochondrion	GO:0003674	molecular_function	---	---
10394353	-0.616772	0.00403212	0610009D07Rik	NM_025323	RefSeq	Mus musculus RIKEN cDNA 0610009D07 gene (0610009D07Rik), mRNA.	FALSE	GO:0006397 // GO:0008380	mRNA processing // RNA splicing	GO:0005634 // GO:0005689	nucleus // U12-type spliceosomal complex	GO:0000166 // GO:0003674 // GO:0003676 // GO:0003723	nucleotide binding // molecular_function // nucleic acid binding // RNA binding	---	---
10395259	-1.31516	1.12559e-05	Nampt	NM_021524	RefSeq	Mus musculus nicotinamide phosphoribosyltransferase (Nampt), mRNA.	FALSE	GO:0009435 // GO:0019363 // GO:0048661 // GO:0051770	NAD biosynthetic process // pyridine nucleotide biosynthetic process // positive regulation of smooth muscle cell proliferation // positive regulation of nitric-oxide synthase biosynthetic process	GO:0005634 // GO:0005737 // GO:0005737	nucleus // cytoplasm // cytoplasm	GO:0004514 // GO:0004516 // GO:0005125 // GO:0008144 // GO:0016740 // GO:0016757 // GO:0042803 // GO:0047280 // GO:0047280	nicotinate-nucleotide diphosphorylase (carboxylating) activity // nicotinate phosphoribosyltransferase activity // cytokine activity // drug binding // transferase activity // transferase activity, transferring glycosyl groups // protein homodimerization activity // nicotinamide phosphoribosyltransferase activity // nicotinamide phosphoribosyltransferase activity	---	---
10395273	-1.76945	0.00415744	Gdap10	BC052902	GenBank	Mus musculus ganglioside-induced differentiation-associated-protein 10, mRNA (cDNA clone MGC:60602 IMAGE:30067675), complete cds.	FALSE	---	---	---	---	---	---	---	---
10395893	-0.591819	0.000333427	Sip1	NM_025656	RefSeq	Mus musculus survival of motor neuron protein interacting protein 1 (Sip1), mRNA.	FALSE	GO:0000245 // GO:0000398 // GO:0006397 // GO:0008380	spliceosomal complex assembly // nuclear mRNA splicing, via spliceosome // mRNA processing // RNA splicing	GO:0005622 // GO:0005634 // GO:0005681 // GO:0005737	intracellular // nucleus // spliceosomal complex // cytoplasm	---	---	---	---
10396694	-0.632564	0.000200588	Churc1	NM_206534	RefSeq	Mus musculus churchill domain containing 1 (Churc1), mRNA.	FALSE	GO:0006351 // GO:0006355 // GO:0007275 // GO:0007498 // GO:0045893 // GO:0045944	transcription, DNA-dependent // regulation of transcription, DNA-dependent // multicellular organismal development // mesoderm development // positive regulation of transcription, DNA-dependent // positive regulation of transcription from RNA polymerase II promoter	GO:0005634	nucleus	GO:0003677 // GO:0008270 // GO:0046872	DNA binding // zinc ion binding // metal ion binding	---	---
10396950	-0.940909	0.000770146	---	ENSMUST00000051437	ENSEMBL	cdna:pseudogene chromosome:NCBIM37:12:82500799:82501110:1 gene:ENSMUSG00000049246 gene_biotype:pseudogene transcript_biotype:transcribed_processed_pseudogene	FALSE	---	---	---	---	---	---	---	---
10397912	-2.71187	0.000550701	Unc79	NM_001081017	RefSeq	Mus musculus unc-79 homolog (C. elegans) (Unc79), mRNA.	FALSE	GO:0008150	biological_process	GO:0005575 // GO:0016020 // GO:0016021	cellular_component // membrane // integral to membrane	GO:0003674	molecular_function	---	---
10398874	-0.632173	0.00206155	Siva1	NM_013929	RefSeq	Mus musculus SIVA1, apoptosis-inducing factor (Siva1), transcript variant 1, mRNA.	FALSE	GO:0006915 // GO:0006917 // GO:0006924 // GO:0008635 // GO:0019987 // GO:0032088	apoptotic process // induction of apoptosis // activation-induced cell death of T cells // activation of cysteine-type endopeptidase activity involved in apoptotic process by cytochrome c // negative regulation of anti-apoptosis // negative regulation of NF-kappaB transcription factor activity	GO:0005634 // GO:0005654 // GO:0005737 // GO:0005739	nucleus // nucleoplasm // cytoplasm // mitochondrion	GO:0001618 // GO:0005164 // GO:0005175 // GO:0005175 // GO:0005515 // GO:0008270 // GO:0008656 // GO:0046872	viral receptor activity // tumor necrosis factor receptor binding // CD27 receptor binding // CD27 receptor binding // protein binding // zinc ion binding // cysteine-type endopeptidase activator activity involved in apoptotic process // metal ion binding	---	---
10400795	-0.87804	0.000202429	Sav1	NM_022028	RefSeq	Mus musculus salvador homolog 1 (Drosophila) (Sav1), mRNA.	FALSE	GO:0001942 // GO:0007165 // GO:0030216 // GO:0030216 // GO:0035329 // GO:0035329 // GO:0043065 // GO:0046620 // GO:0050680 // GO:0060044 // GO:0060412 // GO:0060487 // GO:0060575 // GO:2000036	hair follicle development // signal transduction // keratinocyte differentiation // keratinocyte differentiation // hippo signaling cascade // hippo signaling cascade // positive regulation of apoptotic process // regulation of organ growth // negative regulation of epithelial cell proliferation // negative regulation of cardiac muscle cell proliferation // ventricular septum morphogenesis // lun…	GO:0005634 // GO:0005737	nucleus // cytoplasm	---	---	---	---
10401665	-1.71876	0.00360423	---	ENSMUST00000102019	ENSEMBL	ncrna:rRNA chromosome:NCBIM37:12:87059427:87059545:-1 gene:ENSMUSG00000075973 gene_biotype:rRNA transcript_biotype:rRNA	FALSE	---	---	---	---	---	---	---	---
10402659	-0.832877	0.00334817	Ankrd9	NM_175207	RefSeq	Mus musculus ankyrin repeat domain 9 (Ankrd9), mRNA.	FALSE	GO:0008150	biological_process	GO:0005575	cellular_component	GO:0003674 // GO:0016787	molecular_function // hydrolase activity	---	---
10402835	-0.622912	0.00153976	Nudt14	NM_025399	RefSeq	Mus musculus nudix (nucleoside diphosphate linked moiety X)-type motif 14 (Nudt14), mRNA.	FALSE	GO:0008150	biological_process	GO:0005575 // GO:0005737	cellular_component // cytoplasm	GO:0008768 // GO:0016787 // GO:0016818 // GO:0046872 // GO:0047631	UDP-sugar diphosphatase activity // hydrolase activity // hydrolase activity, acting on acid anhydrides, in phosphorus-containing anhydrides // metal ion binding // ADP-ribose diphosphatase activity	---	---
10403392	-2.37135	4.64734e-05	---	GENSCAN00000045129	ENSEMBL	cdna:genscan chromosome:NCBIM37:13:7386393:7387082:1 transcript_biotype:protein_coding	FALSE	---	---	---	---	---	---	---	---
10404024	-0.8324	0.00155567	Hist1h4h	NM_153173	RefSeq	Mus musculus histone cluster 1, H4h (Hist1h4h), mRNA.	FALSE	GO:0008150	biological_process	GO:0005575	cellular_component	GO:0003674	molecular_function	---	---
10405633	-1.0807	0.00230042	Ntrk2	NM_001025074	RefSeq	Mus musculus neurotrophic tyrosine kinase, receptor, type 2 (Ntrk2), transcript variant 1, mRNA.	FALSE	GO:0001570 // GO:0001764 // GO:0006468 // GO:0007169 // GO:0007275 // GO:0007399 // GO:0007612 // GO:0007616 // GO:0007631 // GO:0008284 // GO:0010628 // GO:0010976 // GO:0014047 // GO:0014068 // GO:0016310 // GO:0019222 // GO:0021954 // GO:0021987 // GO:0030154 // GO:0030182 // GO:0031547 // GO:0031547 // GO:0032314 // GO:0035584 // GO:0042490 // GO:0043408 // GO:0043410 // GO:0043524 // GO:0046…	vasculogenesis // neuron migration // protein phosphorylation // transmembrane receptor protein tyrosine kinase signaling pathway // multicellular organismal development // nervous system development // learning // long-term memory // feeding behavior // positive regulation of cell proliferation // positive regulation of gene expression // positive regulation of neuron projection development // g…	GO:0005622 // GO:0005768 // GO:0005829 // GO:0005886 // GO:0005886 // GO:0005887 // GO:0009986 // GO:0014069 // GO:0016020 // GO:0016021 // GO:0030424 // GO:0030425 // GO:0030426 // GO:0043025 // GO:0043195 // GO:0043197 // GO:0043679 // GO:0048786 // GO:0060076	intracellular // endosome // cytosol // plasma membrane // plasma membrane // integral to plasma membrane // cell surface // postsynaptic density // membrane // integral to membrane // axon // dendrite // growth cone // neuronal cell body // terminal button // dendritic spine // axon terminus // presynaptic active zone // excitatory synapse	GO:0000166 // GO:0004672 // GO:0004713 // GO:0004714 // GO:0004872 // GO:0005030 // GO:0005515 // GO:0005524 // GO:0016301 // GO:0016740 // GO:0016772 // GO:0042803 // GO:0043121 // GO:0043121 // GO:0046875 // GO:0048403 // GO:0048403 // GO:0060175 // GO:0060175	nucleotide binding // protein kinase activity // protein tyrosine kinase activity // transmembrane receptor protein tyrosine kinase activity // receptor activity // neurotrophin receptor activity // protein binding // ATP binding // kinase activity // transferase activity // transferase activity, transferring phosphorus-containing groups // protein homodimerization activity // neurotrophin bindin…	---	---
10406546	-0.993019	0.0040406	---	ENSMUST00000164671	ENSEMBL	cdna:pseudogene chromosome:NCBIM37:13:91360048:91360513:1 gene:ENSMUSG00000091419 gene_biotype:pseudogene transcript_biotype:pseudogene	FALSE	---	---	---	---	---	---	---	---
10407278	-0.785404	0.00334402	---	ENSMUST00000053398	ENSEMBL	cdna:known chromosome:NCBIM37:13:113898281:113898542:1 gene:ENSMUSG00000051002 gene_biotype:protein_coding transcript_biotype:protein_coding	FALSE	---	---	---	---	---	---	---	---
10409629	-0.665487	0.000384975	Klhl3	NM_001195075	RefSeq	Mus musculus kelch-like 3 (Drosophila) (Klhl3), mRNA.	FALSE	GO:0070294 // GO:0072156	renal sodium ion absorption // distal tubule morphogenesis	GO:0005737 // GO:0005829 // GO:0005856	cytoplasm // cytosol // cytoskeleton	GO:0003674 // GO:0003779	molecular_function // actin binding	---	---
10409709	-0.696163	0.00437341	Mir7-1	NR_029825	RefSeq	Mus musculus microRNA 7-1 (Mir7-1), microRNA.	FALSE	GO:0010608 // GO:0035195 // GO:0060576	posttranscriptional regulation of gene expression // gene silencing by miRNA // intestinal epithelial cell development	---	---	---	---	---	---
10413014	-0.6486	0.00433803	Chchd1	NM_025366	RefSeq	Mus musculus coiled-coil-helix-coiled-coil-helix domain containing 1 (Chchd1), mRNA.	FALSE	GO:0008150	biological_process	GO:0005634 // GO:0005730 // GO:0005737 // GO:0005739 // GO:0005739	nucleus // nucleolus // cytoplasm // mitochondrion // mitochondrion	GO:0003674	molecular_function	---	---
10414269	-0.668969	0.000799418	Bnip3	NM_009760	RefSeq	Mus musculus BCL2/adenovirus E1B interacting protein 3 (Bnip3), nuclear gene encoding mitochondrial protein, mRNA.	FALSE	GO:0001666 // GO:0006309 // GO:0006338 // GO:0006915 // GO:0006915 // GO:0006917 // GO:0006917 // GO:0006917 // GO:0008219 // GO:0008629 // GO:0008634 // GO:0010637 // GO:0035694 // GO:0042981 // GO:0043065 // GO:0043243 // GO:0043653 // GO:0045837 // GO:0046902 // GO:0048102 // GO:0050873 // GO:0051402 // GO:0051607 // GO:0070301 // GO:0071279 // GO:0071456 // GO:0072593 // GO:0090141 // GO:0090…	response to hypoxia // apoptotic DNA fragmentation // chromatin remodeling // apoptotic process // apoptotic process // induction of apoptosis // induction of apoptosis // induction of apoptosis // cell death // induction of apoptosis by intracellular signals // negative regulation of survival gene product expression // negative regulation of mitochondrial fusion // mitochondrial protein cataboli…	GO:0005634 // GO:0005635 // GO:0005654 // GO:0005737 // GO:0005739 // GO:0005739 // GO:0005740 // GO:0005741 // GO:0016020 // GO:0016021 // GO:0030425 // GO:0031307 // GO:0031966 // GO:0031966	nucleus // nuclear envelope // nucleoplasm // cytoplasm // mitochondrion // mitochondrion // mitochondrial envelope // mitochondrial outer membrane // membrane // integral to membrane // dendrite // integral to mitochondrial outer membrane // mitochondrial membrane // mitochondrial membrane	GO:0005515 // GO:0042802 // GO:0042803 // GO:0046982 // GO:0051020	protein binding // identical protein binding // protein homodimerization activity // protein heterodimerization activity // GTPase binding	---	---
10414325	-0.585748	0.00103002	Cgrrf1	NM_026832	RefSeq	Mus musculus cell growth regulator with ring finger domain 1 (Cgrrf1), mRNA.	FALSE	GO:0007049 // GO:0007050 // GO:0030308	cell cycle // cell cycle arrest // negative regulation of cell growth	GO:0005575 // GO:0005634	cellular_component // nucleus	GO:0003674 // GO:0008270 // GO:0046872	molecular_function // zinc ion binding // metal ion binding	---	---
10418341	-0.717384	0.00407167	Il17rb	NM_019583	RefSeq	Mus musculus interleukin 17 receptor B (Il17rb), mRNA.	FALSE	GO:0019221	cytokine-mediated signaling pathway	GO:0005576 // GO:0005737 // GO:0005886 // GO:0005887 // GO:0009986 // GO:0016020 // GO:0016021	extracellular region // cytoplasm // plasma membrane // integral to plasma membrane // cell surface // membrane // integral to membrane	GO:0004872 // GO:0004896	receptor activity // cytokine receptor activity	---	---
10419288	-0.824587	0.00103204	Gch1	NM_008102	RefSeq	Mus musculus GTP cyclohydrolase 1 (Gch1), mRNA.	FALSE	GO:0006184 // GO:0006461 // GO:0006729 // GO:0006729 // GO:0008152 // GO:0008217 // GO:0008217 // GO:0014916 // GO:0032496 // GO:0034341 // GO:0034612 // GO:0042311 // GO:0042416 // GO:0042559 // GO:0045776 // GO:0046654 // GO:0048265 // GO:0050884 // GO:0051000 // GO:0051066 // GO:0051260 // GO:0051291	GTP catabolic process // protein complex assembly // tetrahydrobiopterin biosynthetic process // tetrahydrobiopterin biosynthetic process // metabolic process // regulation of blood pressure // regulation of blood pressure // regulation of lung blood pressure // response to lipopolysaccharide // response to interferon-gamma // response to tumor necrosis factor // vasodilation // dopamine biosynth…	GO:0005625 // GO:0005634 // GO:0005737 // GO:0005829 // GO:0031410 // GO:0031965 // GO:0043234	soluble fraction // nucleus // cytoplasm // cytosol // cytoplasmic vesicle // nuclear membrane // protein complex	GO:0000166 // GO:0003824 // GO:0003934 // GO:0003934 // GO:0005509 // GO:0005525 // GO:0008270 // GO:0016787 // GO:0030742 // GO:0042803 // GO:0046872 // GO:0050662	nucleotide binding // catalytic activity // GTP cyclohydrolase I activity // GTP cyclohydrolase I activity // calcium ion binding // GTP binding // zinc ion binding // hydrolase activity // GTP-dependent protein binding // protein homodimerization activity // metal ion binding // coenzyme binding	---	---
10423575	-1.0401	0.00412671	---	---	---	---	---	---	---	---	---	---	---	---	---
10425158	-0.875477	0.00131755	Pdxp	NM_020271	RefSeq	Mus musculus pyridoxal (pyridoxine, vitamin B6) phosphatase (Pdxp), mRNA.	FALSE	GO:0006470 // GO:0007088 // GO:0008152 // GO:0030836 // GO:0031247 // GO:0032465 // GO:0071318	protein dephosphorylation // regulation of mitosis // metabolic process // positive regulation of actin filament depolymerization // actin rod assembly // regulation of cytokinesis // cellular response to ATP	GO:0005737 // GO:0005829 // GO:0005856 // GO:0005886 // GO:0016020 // GO:0042995	cytoplasm // cytosol // cytoskeleton // plasma membrane // membrane // cell projection	GO:0004647 // GO:0004721 // GO:0016787 // GO:0016791 // GO:0031072 // GO:0033883 // GO:0046872	phosphoserine phosphatase activity // phosphoprotein phosphatase activity // hydrolase activity // phosphatase activity // heat shock protein binding // pyridoxal phosphatase activity // metal ion binding	---	---
10425601	-1.55245	2.80804e-06	Tef	NM_153484	RefSeq	Mus musculus thyrotroph embryonic factor (Tef), transcript variant 2, mRNA.	FALSE	GO:0006351 // GO:0006355 // GO:0045944 // GO:0045944 // GO:0048511	transcription, DNA-dependent // regulation of transcription, DNA-dependent // positive regulation of transcription from RNA polymerase II promoter // positive regulation of transcription from RNA polymerase II promoter // rhythmic process	GO:0005634	nucleus	GO:0003677 // GO:0003690 // GO:0003700 // GO:0005515 // GO:0042803 // GO:0043565 // GO:0046982 // GO:0046983	DNA binding // double-stranded DNA binding // sequence-specific DNA binding transcription factor activity // protein binding // protein homodimerization activity // sequence-specific DNA binding // protein heterodimerization activity // protein dimerization activity	---	---
10426110	-0.769316	0.000376268	Pim3	NM_145478	RefSeq	Mus musculus proviral integration site 3 (Pim3), mRNA.	FALSE	GO:0006468 // GO:0006468 // GO:0006915 // GO:0007049 // GO:0007346 // GO:0016310 // GO:0016572 // GO:0043066 // GO:0046777 // GO:0061179	protein phosphorylation // protein phosphorylation // apoptotic process // cell cycle // regulation of mitotic cell cycle // phosphorylation // histone phosphorylation // negative regulation of apoptotic process // protein autophosphorylation // negative regulation of insulin secretion involved in cellular response to glucose stimulus	GO:0005737	cytoplasm	GO:0000166 // GO:0004672 // GO:0004674 // GO:0005515 // GO:0005524 // GO:0016301 // GO:0016740 // GO:0016772	nucleotide binding // protein kinase activity // protein serine/threonine kinase activity // protein binding // ATP binding // kinase activity // transferase activity // transferase activity, transferring phosphorus-containing groups	---	---
10430993	-0.89023	0.003777	1700001L05Rik	NR_027980	RefSeq	Mus musculus RIKEN cDNA 1700001L05 gene (1700001L05Rik), non-coding RNA.	FALSE	GO:0008150	biological_process	GO:0005575	cellular_component	GO:0003674	molecular_function	---	---
10431282	-0.63799	0.00366092	2810001A02Rik	AK012625	GenBank HTC	Mus musculus 10, 11 days embryo whole body cDNA, RIKEN full-length enriched library, clone:2810001A02 product:unclassifiable, full insert sequence.	FALSE	---	---	---	---	---	---	---	---
10433885	-0.773154	0.0044521	Cebpd	NM_007679	RefSeq	Mus musculus CCAAT/enhancer binding protein (C/EBP), delta (Cebpd), mRNA.	FALSE	GO:0006351 // GO:0006355 // GO:0006357 // GO:0045444 // GO:0045444 // GO:0045669 // GO:0045892 // GO:0045944 // GO:0048839	transcription, DNA-dependent // regulation of transcription, DNA-dependent // regulation of transcription from RNA polymerase II promoter // fat cell differentiation // fat cell differentiation // positive regulation of osteoblast differentiation // negative regulation of transcription, DNA-dependent // positive regulation of transcription from RNA polymerase II promoter // inner ear development	GO:0005634 // GO:0005634	nucleus // nucleus	GO:0003677 // GO:0003700 // GO:0005515 // GO:0042803 // GO:0043565 // GO:0044212 // GO:0046982 // GO:0046983	DNA binding // sequence-specific DNA binding transcription factor activity // protein binding // protein homodimerization activity // sequence-specific DNA binding // transcription regulatory region DNA binding // protein heterodimerization activity // protein dimerization activity	---	---
10434133	-0.58792	0.00279492	Dgcr6	NM_010047	RefSeq	Mus musculus DiGeorge syndrome critical region gene 6 (Dgcr6), mRNA.	FALSE	GO:0008150	biological_process	GO:0005575	cellular_component	GO:0003674	molecular_function	---	---
10434441	-0.641447	0.000824454	Ece2	NM_025462	RefSeq	Mus musculus endothelin converting enzyme 2 (Ece2), transcript variant 3, mRNA.	FALSE	GO:0006508 // GO:0008152 // GO:0016486 // GO:0016486 // GO:0032259	proteolysis // metabolic process // peptide hormone processing // peptide hormone processing // methylation	GO:0005794 // GO:0005802 // GO:0016020 // GO:0016021 // GO:0030659	Golgi apparatus // trans-Golgi network // membrane // integral to membrane // cytoplasmic vesicle membrane	GO:0003824 // GO:0004222 // GO:0008168 // GO:0008233 // GO:0008237 // GO:0016740 // GO:0016787 // GO:0046872	catalytic activity // metalloendopeptidase activity // methyltransferase activity // peptidase activity // metallopeptidase activity // transferase activity // hydrolase activity // metal ion binding	---	---
10434523	-0.654493	0.00208515	Polr2h	NM_145632	RefSeq	Mus musculus polymerase (RNA) II (DNA directed) polypeptide H (Polr2h), mRNA.	FALSE	GO:0006351 // GO:0006366 // GO:0006468	transcription, DNA-dependent // transcription from RNA polymerase II promoter // protein phosphorylation	GO:0005634 // GO:0005665 // GO:0005737	nucleus // DNA-directed RNA polymerase II, core complex // cytoplasm	GO:0003674 // GO:0003899	molecular_function // DNA-directed RNA polymerase activity	---	---
10435693	-0.714507	0.00316356	Cox17	NM_001017429	RefSeq	Mus musculus cytochrome c oxidase, subunit XVII assembly protein homolog (yeast) (Cox17), mRNA.	FALSE	GO:0006825 // GO:0043085	copper ion transport // positive regulation of catalytic activity	GO:0005739 // GO:0005758	mitochondrion // mitochondrial intermembrane space	GO:0005507 // GO:0008047 // GO:0016531 // GO:0046872	copper ion binding // enzyme activator activity // copper chaperone activity // metal ion binding	---	---
[truncated: 126 more rows]
